# Supplementary material for: To Have the Best Interest at Heart: Analyzing the Match Between Laypersons’ Interests and Publication Activity in Psychology
Source: Front Psychol. 2022 Jun 2;13:899430. doi: 10.3389/fpsyg.2022.899430 (PMC9201961; doi:10.3389/fpsyg.2022.899430)
Supplement: Supplementary Material 4 — Basic bibliographic metadata of research syntheses extracted from PSYNDEX after validation. [file Table_4.XLSX]

## Sheet: Tabellenblatt1
topic	title	authors	year	journal	doi
Clinical Psychology: Addiction	Effectiveness of psychosocial interventions targeting hazardous and harmful alcohol use and alcohol-related symptoms in low- and middle-income countries: A systematic review	Preusse, Melissa; Neuner, Frank; Ertl, Verena	2020	Frontiers in Psychiatry, 2020	https://doi.org/10.3389/fpsyt.2020.00768
Clinical Psychology: Addiction	Group treatment for substance use disorder in adults: A systematic review and meta-analysis of randomized-controlled trials	Lo Coco, Gianluca; Melchiori, Francesco; Oieni, Veronica; Infurna, Maria Rita; Strauss, Bernhard; Schwartze, Dominique; Rosendahl, Jenny; Gullo, Salvatore	2019	Journal of Substance Abuse Treatment	https://doi.org/10.1016/j.jsat.2019.01.016
Clinical Psychology: Addiction	Treatments for internet addiction, sex addiction and compulsive buying: A meta-analysis	Goslarp, Martina; Leibetseder, Max; Muench, Hannah M.; Hofmann, Stefan G.; Laireiter, Anton-Rupert	2020	Journal of Behavioral Addictions	https://doi.org/10.1556/2006.2020.00005
Clinical Psychology: Addiction	The association between the big five personality traits and smartphone use disorder: A meta-analysis	Marengo, Davide; Sindermann, Cornelia; H<U+FFFD>ckel, Daniela; Settanni, Michele; Elhai, Jon D.; Montag, Christian	2020	Journal of Behavioral Addictions	https://doi.org/10.1556/2006.2020.00069
Clinical Psychology: Addiction	Effectiveness and treatment moderators of internet interventions for adult problem drinking: An individual patient data meta-analysis of 19 randomised controlled trials	Riper, Heleen; Hoogendoorn, Adriaan; Cuijpers, Pim; Karyotaki, Eirini; Boumparis, Nikolaos; Mira, Adriana; Andersson, Gerhard; Berman, Anne H.; Bertholet, Nicolas; Bischof, Gallus; Blankers, Matthijs; Boon, Brigitte; Bo<U+FFFD>, Leif; Brendryen, Havar; Cunningham, John; Ebert, David; Hansen, Anders; Hester, Reid; Khadjesari, Zarnie; Kramer, Jeannet; Murray, Elizabeth; Postel, Marloes; Schulz, Dan…	2018	PLOS Medicine (Online Journal), 2018	https://doi.org/10.1371/journal.pmed.1002714
Clinical Psychology: Addiction	Transcranial electrical and magnetic stimulation (tES and TMS) for addiction medicine: A consensus paper on the present state of the science and the road ahead	Ekhtiari, Hamed; Tavakoli, Hosna; Addolorato, Giovanni; Baeken, Chris; Bonci, Antonello; Campanella, Salvatore; Castelo-Branco, Luis; Challet-Bouju, Ga<U+FFFD>lle; Clark, Vincent P.; Claus, Eric; Dannon, Pinhas N.; Del Felice, Alessandra; den Uyl, Tess; Diana, Marco; di Giannantonio, Massimo; Fedota, John R.; Fitzgerald, Paul; Gallimberti, Luigi; Grall-Bronnec, Marie; Herremans, Sarah C.; Herrman…	2019	Neuroscience and Biobehavioral Reviews	https://doi.org/10.1016/j.neubiorev.2019.06.007
Clinical Psychology: Addiction	Alcohol-specific computerized interventions to alter cognitive biases: A systematic review of effects on experimental tasks, drinking behavior, and neuronal activation	Batschelet, Hallie M.; Stein, Maria; Tschuemperlin, Raphaela M.; Soravia, Leila M.; Moggi, Franz	2020	Frontiers in Psychiatry, 2020	https://doi.org/10.3389/fpsyt.2019.00871
Clinical Psychology: Addiction	Cannabis: Potenzial und Risiko. Eine wissenschaftliche Bestandsaufnahme	Hoch, Eva; Friemel, Chris Maria; Schneider, Miriam	2019		https://doi.org/10.1007/978-3-662-57291-7
Clinical Psychology: Addiction	Review zu gl<U+FFFD>cksspielbezogenen Problemen des Personals von Gl<U+FFFD>cksspielanbietern	Hayer, Tobias; Kornek, Christian	2020	Sucht	https://doi.org/10.1024/0939-5911/a000689
Clinical Psychology: Addiction	Screening and assessment tools for gaming disorder: A comprehensive systematic review	King, Daniel L.; Chamberlain, Samuel R.; Carragher, Natacha; Billieux, Joel; Stein, Dan; Mueller, Kai; Potenza, Marc N.; Rumpf, Hans Juergen; Saunders, John; Starcevic, Vladan; Demetrovics, Zsolt; Brand, Matthias; Lee, Hae Kook; Spada, Marcantonio; Lindenberg, Katajun; Wu, Anise M. S.; Lemenager, Tagrid; Pallesen, Stale; Achab, Sophia; Kyrios, Mike; Higuchi, Susumu; Fineberg, Naomi A.; Delfabbro,…	2020	Clinical Psychology Review, 2020	https://doi.org/10.1016/j.cpr.2020.101831
Clinical Psychology: Addiction	Social networks use disorder and associations with depression and anxiety symptoms: A systematic review of recent research in China	Hussain, Zaheer; Wegmann, Elisa; Yang, Haibo; Montag, Christian	2020	Frontiers in Psychology, 2020	https://doi.org/10.3389/fpsyg.2020.00211
Clinical Psychology: Addiction	Neuronal correlates of delay discounting in healthy subjects and its implication for addiction: An ALE meta-analysis study	Sch<U+FFFD>ller, Canan Beate; Kuhn, Jens; Jessen, Frank; Hu, Xiaochen	2019	American Journal of Drug and Alcohol Abuse	https://doi.org/10.1080/00952990.2018.1557675
Clinical Psychology: Addiction	Alcohol use disorders and the risk of progression of liver disease in people with hepatitis C virus infection - a systematic review	Llamosas-Falc<U+FFFD>n, Laura; Shield, Kevin D.; Gelovany, Maya; Manthey, Jakob; Rehm, J<U+FFFD>rgen	2020	Substance Abuse Treatment, Prevention, and Policy, 2020	https://doi.org/10.1186/s13011-020-00287-1
Clinical Psychology: Addiction	Short- and long-term effects of digital prevention and treatment interventions for cannabis use reduction: A systematic review and meta-analysis	Boumparis, Nikolaos; Loheide-Niesmann, Lisa; Blankers, Matthijs; Ebert, David D.; Korf, Dirk; Schaub, Michael P.; Spijkerman, Renske; Tait, Robert J.; Riper, Heleen	2019	Drug and Alcohol Dependence	https://doi.org/10.1016/j.drugalcdep.2019.03.016
Clinical Psychology: Addiction	Cue-reactivity in behavioral addictions: A meta-analysis and methodological considerations	Starcke, Katrin; Antons, Stephanie; Trotzke, Patrick; Brand, Matthias	2018	Journal of Behavioral Addictions	https://doi.org/10.1556/2006.7.2018.39
Clinical Psychology: Addiction	Alcohol Use Disorders Identification Test (AUDIT) and mortality risk: A systematic review and meta-analysis	Kuitunen-Paul, S<U+FFFD>ren; Roerecke, Michael	2018	Journal of Epidemiology and Community Health	https://doi.org/10.1136/jech-2017-210078
Clinical Psychology: Addiction	A neurobiological pathway to smoking in adolescence: TTC12-ANKK1-DRD2 variants and reward response	Macare, Christine; Ducci, Francesca; Zhang, Yuning; Ruggeri, Barbara; Jia, Tianye; Kaakinen, Marika; Kalsi, Gursharan; Charoen, Pimphen; Casoni, Filippo; Peters, Jan; Bromberg, Uli; Hill, Matthew; Buxton, Jessica; Blakemore, Alexandra; Veijola, Juha; B<U+FFFD>chel, Christian; Banaschewski, Tobias; Bokde, Arun L. W.; Conrod, Patricia; Flor, Herta; Frouin, Vincent; Gallinat, J<U+FFFD>rgen; Garavan,…	2018	European Neuropsychopharmacology	https://doi.org/10.1016/j.euroneuro.2018.07.101
Clinical Psychology: Addiction	Substance related disorders are associated with impaired valuation of delayed gratification and feedback processing: A multilevel meta-analysis and meta-regression	Kluwe-Schiavon, B.; Viola, T. W.; Sanvicente-Vieira, B.; Lumertz, F. S.; Salum, G. A.; Grassi-Oliveira, R.; Quednow, B. B.	2020	Neuroscience and Biobehavioral Reviews	https://doi.org/10.1016/j.neubiorev.2019.11.016
Clinical Psychology: Addiction	Pharmacological treatments for disordered gambling: A meta-analysis	Goslar, Martina; Leibetseder, Max; Muench, Hannah M.; Hofmann, Stefan G.; Laireiter, Anton-Rupert	2019	Journal of Gambling Studies	https://doi.org/10.1007/s10899-018-09815-y
Clinical Psychology: Depression	The endogenous oxytocin system in depressive disorders: A systematic review and meta-analysis	Engel, Sinha; Laufer, Sebastian; Knaevelsrud, Christine; Schumacher, Sarah	2019	Psychoneuroendocrinology	https://doi.org/10.1016/j.psyneuen.2018.11.011
Clinical Psychology: Depression	The prevalence of PTSD and major depression in the global population of adult war survivors: A meta-analytically informed estimate in absolute numbers	Hoppen, Thole Hilko; Morina, Nexhmedin	2019	European Journal of Psychotraumatology, 2019	https://doi.org/10.1080/20008198.2019.1578637
Clinical Psychology: Depression	The relation between attachment and depression in children and adolescents: A multilevel meta-analysis	Spruit, Anouk; Goos, Linda; Weenink, Nikki; Rodenburg, Roos; Niemeyer, Helen; Stams, Geert Jan; Colonnesi, Cristina	2020	Clinical Child and Family Psychology Review	https://doi.org/10.1007/s10567-019-00299-9
Clinical Psychology: Depression	How depressed is "depressed"? A systematic review and diagnostic meta-analysis of optimal cut points for the Beck Depression Inventory revised (BDI-II)	von Glischinski, Michael; von Brachel, Ruth; Hirschfeld, Gerrit	2019	Quality of Life Research	https://doi.org/10.1007/s11136-018-2050-x
Clinical Psychology: Depression	Exploring the association of social comparison with depression and anxiety: A systematic review and meta-analysis	McCarthy, Peter A.; Morina, Nexhmedin	2020	Clinical Psychology and Psychotherapy	https://doi.org/10.1002/cpp.2452
Clinical Psychology: Depression	Physical activity for the treatment of adolescent depression: A systematic review and meta-analysis	Oberste, Max; Medele, Marie; Javelle, Florian; Wunram, Heidrun Lioba; Walter, Daniel; Bloch, Wilhelm; Bender, Stephan; Fricke, Oliver; Joisten, Niklas; Walzik, David; Gro<U+FFFD>heinrich, Nicola; Zimmer, Philipp	2020	Frontiers in Physiology, 2020	https://doi.org/10.3389/fphys.2020.00185
Clinical Psychology: Depression	Psychological interventions for posttraumatic stress disorder and depression in refugees: A meta-analysis of randomized controlled trials	Kip, Ahlke; Priebe, Stefan; Holling, Heinz; Morina, Nexhmedin	2020	Clinical Psychology and Psychotherapy	https://doi.org/10.1002/cpp.2446
Clinical Psychology: Depression	Hormones of the hypothalamic-pituitary-gonadal (HPG) axis in male depressive disorders - A systematic review and meta-analysis	Fischer, Susanne; Ehlert, Ulrike; Castro, Rita Amiel	2019	Frontiers in Neuroendocrinology, 2019	https://doi.org/10.1016/j.yfrne.2019.100792
Clinical Psychology: Depression	Effects of Internet-based cognitive behavioral therapy in routine care for adults in treatment for depression and anxiety: Systematic review and meta-analysis	Etzelmueller, Anne; Vis, Christiaan; Karyotaki, Eirini; Baumeister, Harald; Titov, Nickolai; Berking, Matthias; Cuijpers, Pim; Riper, Heleen; Ebert, David Daniel	2020	Journal of Medical Internet Research, 2020	https://doi.org/10.2196/18100
Clinical Psychology: Depression	Psychiatric and psychosomatic consultation-liaison services in general hospitals: A systematic review and meta-analysis of effects on symptoms of depression and anxiety	Stein, Barbara; M<U+FFFD>ller, Markus M.; Meyer, Lisa K.; S<U+FFFD>llner, Wolfgang; Merkle, Wolfgang; Hannich, Hans-Joachim; Kern-Ehrlich, Alexander; Moelein-Teising, Ingrid; Weidner, Kerstin; Vitinius, Frank; Fazekas, Christian; Jenewein, Josef	2020	Psychotherapy and Psychosomatics	https://doi.org/10.1159/000503177
Clinical Psychology: Depression	Efficacy and tolerability of pharmacological and non-pharmacological interventions in older patients with major depressive disorder: A systematic review, pairwise and network meta-analysis	Krause, Marc; Gutsmiedl, Katharina; Bighelli, Irene; Schneider-Thoma, Johannes; Chaimani, Anna; Leucht, Stefan	2019	European Neuropsychopharmacology	https://doi.org/10.1016/j.euroneuro.2019.07.130
Clinical Psychology: Depression	The efficacy of light therapy in the treatment of seasonal affective disorder: A meta-analysis of randomized controlled trials	Pjrek, Edda; Friedrich, Michaela-Elena; Cambioli, Luca; Dold, Markus; J<U+FFFD>ger, Fiona; Komorowski, Arkadiusz; Lanzenberger, Rupert; Kasper, Siegfried; Winkler, Dietmar	2020	Psychotherapy and Psychosomatics	https://doi.org/10.1159/000502891
Clinical Psychology: Depression	Risk factors and clinical manifestations of prolonged grief disorder: Particular characteristics of violent loss	Heeke, Carina	2018		https://doi.org/10.17169/refubium-359
Clinical Psychology: Depression	Geschlechtsunterschiede in Glucocorticoidkonzentrationen und Entz<U+FFFD>ndungsparametern im Zusammenhang mit Depression. Eine systematische <U+FFFD>bersichtsarbeit	Schneider, Lena; Walther, Andreas	2020	Nervenheilkunde	https://doi.org/10.1055/a<U+FFFD>1033<U+FFFD>9899
Clinical Psychology: Depression	Depression and burnout in (junior) elite athletes: Reviewing the state of knowledge and analysing their relationship	Nixdorf, Raphael	2018		http://nbn-resolving.de/urn:nbn:de:bvb:91-diss-20180606-1375844-1-2
Clinical Psychology: Depression	Transkranielle Magnetstimulation zur Behandlung von Depressionen bei Schwangeren. Eine <U+FFFD>bersicht	Hebel, Tobias; Schecklmann, Martin; Langguth, Berthold	2020	Nervenheilkunde	https://doi.org/10.1055/a-1113-0084
Clinical Psychology: Depression	Brain structural effects of treatments for depression and biomarkers of response: A systematic review of neuroimaging studies	Enneking, Verena; Leehr, Elisabeth J.; Dannlowski, Udo; Redlich, Ronny	2020	Psychological Medicine	https://doi.org/10.1017/S0033291719003660
Clinical Psychology: Depression	Smartphone applications for depression: A systematic literature review and a survey of health care professionals' attitudes towards their use in clinical practice	Kerst, Ariane; Zielasek, J<U+FFFD>rgen; Gaebel, Wolfgang	2020	European Archives of Psychiatry and Clinical Neuroscience	https://doi.org/10.1007/s00406-018-0974-3
Clinical Psychology: Depression	Moderators of psychological and psychoeducational interventions for the prevention of depression: A systematic review	Conejo-Cer<U+FFFD>n, Sonia; <U+FFFD>ngel Bell<U+FFFD>n, Juan; Motrico, Emma; Campos-Pa<U+FFFD>no, Henar; Mart<U+FFFD>n-G<U+FFFD>mez, Carmen; Ebert, David D.; Buntrock, Claudia; Gili, Margalida; Moreno-Peral, Patricia	2020	Clinical Psychology Review, 2020	https://doi.org/10.1016/j.cpr.2020.101859
Clinical Psychology: Depression	Lipidomics in major depressive disorder	Walther, Andreas; Cannistraci, Carlo Vittorio; Simons, Kai; Dur<U+FFFD>n, Claudio; Gerl, Mathias J.; Wehrli, Susanne; Kirschbaum, Clemens	2018	Frontiers in Psychiatry, 2018	https://doi.org/10.3389/fpsyt.2018.00459
Clinical Psychology: Depression	Associations between premenstrual syndrome and postpartum depression: A systematic literature review	Castro, R. T. Amiel; Pataky, E. A.; Ehlert, U.	2019	Biological Psychology, 2019	https://doi.org/10.1016/j.biopsycho.2018.10.014
Clinical Psychology: Depression	Transcranial magnetic stimulation in the treatment of depression during pregnancy: A review	Hebel, Tobias; Schecklmann, Martin; Langguth, Berthold	2020	Archives of Women's Mental Health	https://doi.org/10.1007/s00737-019-01004-z
Clinical Psychology: Depression	Symptoms assessed in studies on perimenopausal depression: A narrative review	Willi, Jasmine; Ehlert, Ulrike	2020	Sexual & Reproductive Healthcare, 2020	https://doi.org/10.1016/j.srhc.2020.100559
Clinical Psychology: Depression	Mediators in psychological and psychoeducational interventions for the prevention of depression and anxiety. A systematic review	Moreno-Peral, Patricia; <U+FFFD>ngel Bell<U+FFFD>n, Juan; Huibers, Marcus J. H.; Mestre, Jos<U+FFFD> M.; Joaqu<U+FFFD>n Garc<U+FFFD>a-L<U+FFFD>pez, Lu<U+FFFD>s; Taubner, Svenja; Rodr<U+FFFD>guez-Morej<U+FFFD>n, Alberto; Bolinski, Felix; Sales, C<U+FFFD>lia M. D.; Conejo-Cer<U+FFFD>n, Sonia	2020	Clinical Psychology Review, 2020	https://doi.org/10.1016/j.cpr.2020.101813
Clinical Psychology: Depression	Depression in somatic disorders: Is there a beneficial effect of exercise?	Roeh, Astrid; Kirchner, Sophie K.; Malchow, Berend; Maurus, Isabel; Schmitt, Andrea; Falkai, Peter; Hasan, Alkomiet	2019	Frontiers in Psychiatry, 2019	https://doi.org/10.3389/fpsyt.2019.00141
Clinical Psychology: Depression	Comparative effectiveness of continuation and maintenance treatments for persistent depressive disorder in adults	Machmutow, Katja; Meister, Ramona; Jansen, Alessa; Kriston, Levente; Watzke, Birgit; H<U+FFFD>rter, Martin Christian; Liebherz, Sarah	2019	Cochrane Database of Systematic Reviews, 2019	https://doi.org/10.1002/14651858.CD012855.pub2
Clinical Psychology: Depression	Therapeutic alliance in technology-based interventions for the treatment of depression: Systematic review	Wehmann, Eileen; K<U+FFFD>hnen, Moritz; H<U+FFFD>rter, Martin; Liebherz, Sarah	2020	Journal of Medical Internet Research, 2020	https://doi.org/10.2196/17195
Clinical Psychology: Depression	Neuroimaging insights into the link between depression and Insomnia: A systematic review	Bagherzadeh-Azbari, Shadi; Khazaie, Habibolah; Zarei, Mojtaba; Spiegelhalder, Kai; Walter, Martin; Leerssen, Jeanne; Van Someren, Eus J. W.; Sepehry, Amir A.; Tahmasian, Masoud	2019	Journal of Affective Disorders	https://doi.org/10.1016/j.jad.2019.07.089
Clinical Psychology: Depression	Confining the concept of vascular depression to late-onset depression: A meta-analysis of MRI-defined hyperintensity burden in major depressive disorder and bipolar disorder	Salo, Katharina, I; Scharfen, Jana; Wilden, Isabelle D.; Schubotz, Ricarda, I; Holling, Heinz	2019	Frontiers in Psychology, 2019	https://doi.org/10.3389/fpsyg.2019.01241
Clinical Psychology: Depression	Towards an evidence-based unified psychodynamic protocol for emotional disorders	Leichsenring, Falk; Steinert, Christiane	2018	Journal of Affective Disorders	https://doi.org/10.1016/j.jad.2017.11.036
Clinical Psychology: Depression	Polymorphisms in genes related to the hypothalamic-pituitary-adrenal axis and antidepressant response. Systematic review	Fischer, Susanne; Gardini, Elena S.; Haas, Florence; Cleare, Anthony J.	2019	Neuroscience and Biobehavioral Reviews	https://doi.org/10.1016/j.neubiorev.2018.11.009
Clinical Psychology: Depression	Zusammenhang zwischen beruflichen Traumata, posttraumatischer Belastungsst<U+FFFD>rung und Depression - eine Beurteilung von systematischen Reviews	Bolm-Audorff, Ulrich; Petereit-Haack, Gabriela; Seidler, Andreas	2019	Psychiatrische Praxis	https://doi.org/10.1055/a-0822-7712
Clinical Psychology: Depression	Collaborative meta-analysis finds no evidence of a strong interaction between stress and 5-HTTLPR genotype contributing to the development of depression	Culverhouse, R. C.; Saccone, N. L.; Horton, A. C.; Ma, Y.; Anstey, K. J.Bierut, L. J.; Banaschewski, T.; Burmeister, M.; Cohen-Woods, S.; Etain, B.Laucht, M.; Fisher, H. L.; Goldman, N.; Guillaume, S.; Horwood, J.; Juhasz, G; Lester, K. J.; Mandelli, L.; Middeldorp, C. M.; Olie, E.; Villafuerte, S.; Air, T. M.; Araya, R.Ritchie, K.; Bowes, L.; Burns, R.Fergusson, D. M.; Byrne, E. M.; Coffey, C.; …	2018	Molecular Psychiatry	https://doi.org/10.1038/mp.2017.44
Clinical Psychology: Depression	Problem-solving therapy for adult depression: An updated meta-analysis	Cuijpers, Pim; de Wit, Leonore; Kleiboer, Annet; Karyotaki, Eirini; Ebert, David D.	2018	European Psychiatry	https://doi.org/10.1016/j.eurpsy.2017.11.006
Clinical Psychology: Depression	Association of depression and anxiety disorders with autoimmune thyroiditis: A systematic review and meta-analysis	Siegmann, Eva-Maria; M<U+FFFD>ller, Helge H. O.; Luecke, Caroline; Philipsen, Alexandra; Kornhuber, Johannes; Gr<U+FFFD>mer, Teja Wolfgang	2018	JAMA Psychiatry	https://doi.org/10.1001/jamapsychiatry.2018.0190
Clinical Psychology: Depression	Age of anxiety and depression revisited: A meta-analysis of two European community samples (1964-2015)	Sch<U+FFFD>rmann, Jan; Margraf, J<U+FFFD>rgen	2018	International Journal of Clinical and Health Psychology	https://doi.org/10.1016/j.ijchp.2018.02.002
Clinical Psychology: Depression	Efficacy and moderators of psychological interventions in treating subclinical symptoms of depression and preventing major depressive disorder onsets: Protocol for an individual patient data meta-analysis of randomised controlled trials	Ebert, David D.; Buntrock, Claudia; Reins, Jo Annika; Zimmermann, Johannes; Cuijpers, Pim	2018	BMJ Open, 2018	https://doi.org/10.1136/bmjopen-2017-018582
Clinical Psychology: Depression	The accuracy of the Patient Health Questionnaire-9 algorithm for screening to detect major depression: An individual participant data meta-analysis	He, Chen; Levis, Brooke; Riehm, Kira E.; Saadat, Nazanin; Levis, Alexander W.; Azar, Marleine; Rice, Danielle B.; Krishnan, Ankur; Wu, Yin; Sun, Ying; Imran, Mahrukh; Boruff, Jill; Cuijpers, Pim; Gilbody, Simon; Ioannidis, John P. A.; Kloda, Lorie A.; McMillan, Dean; Patten, Scott B.; Shrier, Ian; Ziegelstein, Roy C.; Akena, Dickens H.; Arroll, Bruce; Ayalon, Liat; Baradaran, Hamid R.; Baron, Mur…	2020	Psychotherapy and Psychosomatics	https://doi.org/10.1159/000502294
Clinical Psychology: Depression	Is psychotherapy effective? A re-analysis of treatments for depression	Munder, T.; Fl<U+FFFD>ckiger, C.; Leichsenring, F.; Abbass, A. A.; Hilsenroth, M. J.; Luyten, P.; Rabung, S.; Steinert, C.; Wampold, B. E.	2019	Epidemiology and Psychiatric Sciences	https://doi.org/10.1017/S2045796018000355
Clinical Psychology: Depression	The symptom-specific efficacy of antidepressant medication vs. cognitive behavioral therapy in the treatment of depression: Results from an individual patient data meta-analysis	Boschloo, Lynn; Bekhuis, Ella; Weitz, Erica S.; Reijnders, Mirjam; DeRubeis, Robert J.; Dimidjian, Sona; Dunner, David L.; Dunlop, Boadie W.; Hegerl, Ulrich; Hollon, Steven D.; Jarrett, Robin B.; Kennedy, Sidney H.; Miranda, Jeanne; Mohr, David C.; Simons, Anne D.; Parker, Gordon; Petrak, Frank; Herpertz, Stephan; Quilty, Lena C.; Rush, A. John; Segal, Zindel V.; Vittengl, Jeffrey R.; Schoevers, …	2019	World Psychiatry	https://doi.org/10.1002/wps.20630
Clinical Psychology: Depression	ENIGMA MDD: Seven years of global neuroimaging studies of major depression through worldwide data sharing	Schmaal, Lianne; Pozzi, Elena; Ho, Tiffany C.; van Velzen, Laura S.; Veer, Ilya M.; Opel, Nils; Van Someren, Eus J. W.; Han, Laura K. M.; Aftanas, Lybomir; Aleman, Andr<U+FFFD>; Baune, Bernhard T.; Berger, Klaus; Blanken, Tessa F.; Capitao, Liliana; Couvy-Duchesne, Baptiste; Cullen, Kathryn R.; Dannlowski, Udo; Davey, Christopher; Erwin-Grabner, Tracy; Evans, Jennifer; Frodl, Thomas; Fu, Cynthia …	2020	Translational Psychiatry, 2020	https://doi.org/10.1038/s41398-020-0842-6
Clinical Psychology: Depression	What we learn about bipolar disorder from large-scale neuroimaging: Findings and future directions from the ENIGMA Bipolar Disorder Working Group	Ching, Christopher R. K.; Hibar, Derrek P.; Gurholt, Tiril P.; Nunes, Abraham; Thomopoulos, Sophia I.; Ab<U+FFFD>, Christoph; Agartz, Ingrid; Brouwer, Rachel M.; Cannon, Dara M.; de Zwarte, Sonja M. C.; Eyler, Lisa T.; Favre, Pauline; Hajek, Tomas; Haukvik, Unn K.; Houenou, Josselin; Land<U+FFFD>n, Mikael; Lett, Tristram A.; McDonald, Colm; Nabulsi, Leila; Patel, Yash; Pauling, Melissa E.; Paus, …	2020	Human Brain Mapping	https://doi.org/10.1002/hbm.25098
Clinical Psychology: Depression	Cognitive effects of non-surgical brain stimulation for major depressive disorder: Protocol for a systematic review and meta-analysis	Kiebs, Maximilian; Hurlemann, Ren<U+FFFD>; Mutz, Julian	2019	BMJ Open, 2019	https://doi.org/10.1136/bmjopen-2018-023796
Clinical Psychology: Depression	Effects of expressive writing on depressive symptoms - A meta-analysis	Reinhold, Maren; B<U+FFFD>rkner, Paul-Christian; Holling, Heinz	2018	Clinical Psychology - Science and Practice, 2018	https://doi.org/10.1186/s13229-018-0199-3
Clinical Psychology: Depression	Association of the polygenic scores for personality traits and response to selective serotonin reuptake inhibitors in patients with major depressive disorder	Amare, Azmeraw T.; Schubert, Klaus Oliver; Tekola-Ayele, Fasil; Hsu, Yi-Hsiang; Sangkuhl, Katrin; Jenkins, Gregory; Whaley, Ryan M.; Barman, Poulami; Batzler, Anthony; Altman, Russ B.; Arolt, Volker; Brockm<U+FFFD>ller, J<U+FFFD>rgen; Chen, Chia-Hui; Domschke, Katharina; Hall-Flavin, Daniel K.; Hong, Chen-Jee; Illi, Ari; Ji, Yuan; Kampman, Olli; Kinoshita, Toshihiko; Leinonen, Esa; Liou, Ying-Jay…	2018	Frontiers in Psychiatry, 2018	https://doi.org/10.3389/fpsyt.2018.00065
Clinical Psychology: Depression	Preventing depression in the offspring of parents with depression: A systematic review and meta-analysis of randomized controlled trials	Loechner, Johanna; Starman, Kornelija; Galuschka, Katharina; Tamm, Jeanette; Schulte-K<U+FFFD>rne, Gerd; Rubel, Julian; Platt, Belinda	2018	Clinical Psychology Review	https://doi.org/10.1016/j.cpr.2017.11.009
Clinical Psychology: Depression	Cost effectiveness of guided internet-based interventions for depression in comparison with control conditions: An individual-participant data meta-analysis	Kolovos, Spyros; van Dongen, Johanna M.; Riper, Heleen; Buntrock, Claudia; Cuijpers, Pim; Ebert, David D.; Geraedts, Anna S.; Kenter, Robin M.; Nobis, Stephanie; Smith, Andrea; Warmerdam, Lisanne; Hayden, Jill A.; van Tulder, Maurits W.; Bosmans, Judith E.	2018	Depression and Anxiety	https://doi.org/10.1002/da.22714
Clinical Psychology: Depression	Cognitive-behavioral analysis system of psychotherapy, drug, or their combination for persistent depressive disorder: Personalizing the treatment choice using individual participant data network metaregression	Furukawa, Toshi A.; Efthimiou, Orestis; Weitz, Erica S.; Cipriani, Andrea; Keller, Martin B.; Kocsis, James H.; Klein, Daniel N.; Michalak, Johannes; Salanti, Georgia; Cuijpers, Pim; Schramm, Elisabeth	2018	Psychotherapy and Psychosomatics	https://doi.org/10.1159/000489227
Clinical Psychology: Depression	Cognitive effects of transcranial direct current stimulation treatment in patients with major depressive disorder: An individual patient data meta-analysis of randomised, sham-controlled trials	Martin, Donel M.; Moffa, Adriano; Nikolin, Stevan; Bennabi, Djamila; Brunoni, Andr<U+FFFD> R.; Flannery, William; Haffen, Emmanuel; McClintock, Shawn M.; Moreno, Marina L.; Padberg, Frank; Palm, Ulrich; Loo, Colleen K.	2018	Neuroscience and Biobehavioral Reviews	https://doi.org/10.1016/j.neubiorev.2018.04.008
Clinical Psychology: Depression	Does childhood trauma moderate polygenic risk for depression? A meta-analysis of 5765 subjects from the Psychiatric Genomics Consortium	Peyrot, Wouter J.; Van der Auwera, Sandra; Milaneschi, Yuri; Dolan, Conor V.; Madden, Pamela A. F.; Sullivan, Patrick F.; Strohmaier, Jana; Ripke, Stephan; Rietschel, Marcella; Nivard, Michel G.; Mullins, Niamh; Montgomery, Grant W.; Henders, Anjali K.; Heat, Andrew C.; Fisher, Helen L.; Dunn, Erin C.; Byrne, Enda M.; Air, Tracy A.; Baune, Bernhard T.; Breen, Gerome; Levinson, Douglas F.; Lewis, …	2018	Biological Psychiatry	https://doi.org/10.1016/j.biopsych.2017.09.009
Clinical Psychology: Depression	Association of testosterone treatment with alleviation of depressive symptoms in men: A systematic review and meta-analysis	Walther, Andreas; Breidenstein, Jonas; Miller, Robert	2019	JAMA Psychiatry	https://doi.org/10.1001/jamapsychiatry.2018.2734
Clinical Psychology: Depression	Negative effects of psychotherapies for adult depression: A meta-analysis of deterioration rates	Cuijpers, Pim; Reijnders, Mirjam; Karyotaki, Eirini; de Wit, Leonore; Ebert, David D.	2018	Journal of Affective Disorders	https://doi.org/10.1016/j.jad.2018.05.050
Clinical Psychology: Depression	Lack of evidence for the efficacy of psychotherapies for PTSD and depression in child and adolescent refugees	Morina, Nexhmedin; Sterr, Tim Nicolai	2019	World Psychiatry	https://doi.org/10.1002/wps.20596
Clinical Psychology: Depression	Neural correlates of affective disturbances: A comparative meta-analysis of negative affect processing in borderline personality disorder, major depressive disorder, and posttraumatic stress disorder	Schulze, Lars; Schulze, Andreas; Renneberg, Babette; Schmahl, Christian; Niedtfeld, Inga	2019	Biological Psychiatry: Cognitive Neuroscience and Neuroimaging	https://doi.org/10.1016/j.bpsc.2018.11.004
Clinical Psychology: Depression	An update of a meta-analysis on the clinical outcomes of deep transcranial magnetic stimulation (DTMS) in major depressive disorder (MDD)	Gellersen, Helena M.; Kedzior, Karina Karolina	2018	Zeitschrift f<U+FFFD>r Psychologie	https://doi.org/10.1027/2151-2604/a000320
Clinical Psychology: Depression	Augmentation therapies for treatment-resistant depression: Systematic review and meta-analysis	Strawbridge, Rebecca; Carter, Ben; Marwood, Lindsey; Bandelow, Borwin; Tsapekos, Dimosthenis; Nikolova, Viktoriya L.; Taylor, Rachael; Mantingh, Tim; de Angel, Valeria; Patrick, Fiona; Cleare, Anthony J.; Young, Allan H.	2019	British Journal of Psychiatry	https://doi.org/10.1192/bjp.2018.233
Clinical Psychology: Depression	Eine meta-analytische Untersuchung des sozio<U+FFFD>konomischen Status als Risikofaktor f<U+FFFD>r postpartale Depression	Hehlmann, Miriam I.; Schaan, Violetta; Rubel, Julian A.	2018	Zeitschrift f<U+FFFD>r Klinische Psychologie und Psychotherapie	https://doi.org/10.1026/1616-3443/a000491
Clinical Psychology: Depression	Efficacy of inpatient psychotherapy for major depressive disorder: A meta-analysis of controlled trials	Schefft, C.; Guhn, A.; Brakemeier, E.-L.; Sterzer, P.; K<U+FFFD>hler, S.	2019	Acta Psychiatrica Scandinavica	https://doi.org/10.1111/acps.12995
Clinical Psychology: Depression	A genome-wide association meta-analysis of prognostic outcomes following cognitive behavioural therapy in individuals with anxiety and depressive disorders	Rayner, Christopher; Coleman, Jonathan R. I.; Purves, Kirstin L.; Hodsoll, John; Goldsmith, Kimberley; Alpers, Georg W.; Andersson, Evelyn; Arolt, Volker; Boberg, Julia; B<U+FFFD>gels, Susan; Creswell, Cathy; Cooper, Peter; Curtis, Charles; Deckert, J<U+FFFD>rgen; Domschke, Katharina; El Alaoui, Samir; Fehm, Lydia; Fydrich, Thomas; Gerlach, Alexander L.; Grocholewski, Anja; Hahlweg, Kurt; Hamm, A…	2019	Translational Psychiatry, 2019	https://doi.org/10.1038/s41398-019-0481-y
Clinical Psychology: Depression	Does depression after stroke negatively influence physical disability? A systematic review and meta-analysis of longitudinal studies	Bl<U+FFFD>chl, Maria; Meissner, Sophie; Nestler, Steffen	2019	Journal of Affective Disorders	https://doi.org/10.1016/j.jad.2018.12.082
Clinical Psychology: Depression	Was Eysenck right after all? A reassessment of the effects of psychotherapy for adult depression	Cuijpers, P.; Karyotaki, E.; Reijnders, M.; Ebert, D. D.	2019	Epidemiology and Psychiatric Sciences	https://doi.org/10.1017/S2045796018000057
Clinical Psychology: Depression	A meta-analysis of heart rate variability in major depression	Koch, Celine; Wilhelm, Marcel; Salzmann, Stefan; Rief, Winfried; Euteneuer, Frank	2019	Psychological Medicine	https://doi.org/10.1017/S0033291719001351
Clinical Psychology: Depression	Do guided Internet-based interventions result in clinically relevant changes for patients with depression? An individual participant data meta-analysis	Karyotaki, Eirini; Ebert, David Daniel; Donkin, Liesje; Riper, Heleen; Twisk, Jos; Burger, Simone; Rozental, Alexander; Lange, Alfred; Williams, Alishia D.; Zarski, Anna Carlotta; Geraedts, Anna; van Straten, Annemieke; Kleiboer, Annet; Meyer, Bjoern; Ince, Bur<U+FFFD>in B. <U+FFFD>nl<U+FFFD>; Buntrock, Claudia; Lehr, Dirk; Snoek, Frank J.; Andrews, Gavin; Andersson, Gerhard; Choi, Isabella; Ruwa…	2018	Clinical Psychology Review	https://doi.org/10.1016/j.cpr.2018.06.007
Clinical Psychology: Depression	Probability of major depression diagnostic classification using semi-structured versus fully structured diagnostic interviews	Levis, Brooke; Benedetti, Andrea; Riehm, Kira E.; Saadat, Nazanin; Levis, Alexander W.; Azar, Marleine; Rice, Danielle B.; Chiovitti, Matthew J.; Sanchez, Tatiana A.; Cuijpers, Pim; Gilbody, Simon; Ioannidis, John A.; Kloda, Lorie A.; McMillan, Dean; Patten, Scott B.; Shrier, Ian; Steele, Russell J.; Ziegelstein, Roy C.; Akena, Dickens H.; Arroll, Bruce; Ayalon, Liat; Baradaran, Hamid R.; Baron, …	2018	British Journal of Psychiatry	https://doi.org/10.1192/bjp.2018.54
Clinical Psychology: Depression	Music-based interventions to reduce internalizing symptoms in children and adolescents: A meta-analysis	Geipel, Josephine; Koenig, Julian; Hillecke, Thomas K.; Resch, Franz; Kaess, Michael	2018	Journal of Affective Disorders	https://doi.org/10.1016/j.jad.2017.08.035
Clinical Psychology: Depression	Longitudinal course of cognitive function across treatment in patients with MDD: A meta-analysis	Bernhardt, Maren; Klauke, Selina; Schr<U+FFFD>der, Annette	2019	Journal of Affective Disorders	https://doi.org/10.1016/j.jad.2019.02.021
Clinical Psychology: Depression	Social networks use disorder and associations with depression and anxiety symptoms: A systematic review of recent research in China	Hussain, Zaheer; Wegmann, Elisa; Yang, Haibo; Montag, Christian	2020	Frontiers in Psychology, 2020	https://doi.org/10.3389/fpsyg.2020.00211
Clinical Psychology: Depression	The effects of meditation, yoga, and mindfulness on depression, anxiety, and stress in tertiary education students: A meta-analysis	Breedvelt, Josefien J. F.; Amanvermez, Yagmur; Harrer, Mathias; Karyotaki, Eirini; Gilbody, Simon; Bockting, Claudi L. H.; Cuijpers, Pim; Ebert, David D.	2019	Frontiers in Psychiatry, 2019	https://doi.org/10.3389/fpsyt.2019.00193
Clinical Psychology: Depression	Featured article: Depressive symptoms in parents of children with chronic health conditions: A meta-analysis	Pinquart, Martin	2019	Journal of Pediatric Psychology	https://doi.org/10.1093/jpepsy/jsy075
Clinical Psychology: Depression	Effects of mindfulness exercises as stand-alone intervention on symptoms of anxiety and depression: Systematic review and meta-analysis	Blanck, Paul; Perleth, Sarah; Heidenreich, Thomas; Kr<U+FFFD>ger, Paula; Ditzen, Beate; Bents, Hinrich; Mander, Johannes	2018	Behaviour Research and Therapy	https://doi.org/10.1016/j.brat.2017.12.002
Clinical Psychology: Depression	Comparison of treatment rates of depression after stroke versus myocardial infarction: A systematic review and meta-analysis of observational data	Ladwig, Simon; Zhou, Zien; Xu, Ying; Wang, Xia; Chow, Clara K.; Werheid, Katja; Hackett, Maree L.	2018	Psychosomatic Medicine	https://doi.org/10.1097/PSY.0000000000000632
Clinical Psychology: Depression	Effects of exercise on depression and anxiety in persons living with HIV: A meta-analysis	Heissel, Andreas; Zech, Philipp; Rapp, Michael A.; Schuch, Felipe B.; Lawrence, Jimmy B.; Kangas, Maria; Heinzel, Stephan	2019	Journal of Psychosomatic Research, 2019	https://doi.org/10.1016/j.jpsychores.2019.109823
Clinical Psychology: Depression	Prevalence of depression and posttraumatic stress disorder in adult civilian survivors of war who stay in war-afflicted regions. A systematic review and meta-analysis of epidemiological studies	Morina, Nexhmedin; Stam, Kimberly; Pollet, Thomas V.; Priebe, Stefan	2018	Journal of Affective Disorders	https://doi.org/10.1016/j.jad.2018.07.027
Clinical Psychology: Depression	The effectiveness of behavioural and cognitive behavioural therapies for insomnia on depressive and fatigue symptoms: A systematic review and network meta-analysis	Ballesio, Andrea; Aquino, Maria Raisa Jessica V.; Feige, Bernd; Johann, Anna F.; Kyle, Simon D.; Spiegelhalder, Kai; Lombardo, Caterina; R<U+FFFD>cker, Gerta; Riemann, Dieter; Baglioni, Chiara	2018	Sleep Medicine Reviews	https://doi.org/10.1016/j.smrv.2017.01.006
Clinical Psychology: Depression	Efficacy of new-generation antidepressants assessed with the Montgomery-Asberg Depression Rating Scale, the gold standard clinician rating scale: A meta-analysis of randomised placebo-controlled trials	Hengartner, Michael P.; Jakobsen, Janus C.; S<U+FFFD>rensen, Anders; Pl<U+FFFD>derl, Martin	2020	PLoS ONE, 2020	https://doi.org/10.1371/journal.pone.0229381
Clinical Psychology: Neurological and Somatic Disorders	Music therapy in the psychosocial treatment of adult cancer patients: A systematic review and meta-analysis	Köhler, Friederike; Martin, Zoe-Sofia; Hertrampf, Ruth-Susanne; Gäbel, Christine; Kessler, Jens; Ditzen, Beate; Warth, Marco	2020	Frontiers in Psychology, 2020	https://doi.org/10.3389/fpsyg.2020.00651
Clinical Psychology: Neurological and Somatic Disorders	Psychosocial interventions for pain management in advanced cancer patients: A systematic review and meta-analysis	Warth, Marco; Zöller, Joshua; Köhler, Friederike; Aguilar-Raab, Corina; Kessler, Jens; Ditzen, Beate	2020	Current Oncology Reports, 2020	https://doi.org/10.1007/s11912-020-0870-7
Clinical Psychology: Neurological and Somatic Disorders	Do cognitive interventions for preschoolers improve executive functions and reduce ADHD and externalizing symptoms? A meta-analysis of randomized controlled trials	Pauli-Pott, Ursula; Mann, Christopher; Becker, Katja	2020	European Child & Adolescent Psychiatry	https://doi.org/10.1007/s00787-020-01627-z
Clinical Psychology: Neurological and Somatic Disorders	Ätiologie und Behandlung externalisierender Störungen im Kindesalter	Mingebach, Tanja	2018		https://doi.org/10.17192/z2018.0104
Clinical Psychology: Neurological and Somatic Disorders	Improving attentional abilities of children in clinical settings. Verbesserung der Aufmerksamkeitsleistungen von Kindern in klinischen Kontexten	Van Doren, Jessica	2020		http://nbn-resolving.de/urn:nbn:de:bvb:29-opus4-132494
Clinical Psychology: Neurological and Somatic Disorders	Sustained effects of neurofeedback in ADHD: A systematic review and meta-analysis	Van Doren, Jessica; Arns, Martijn; Heinrich, Hartmut; Vollebregt, Madelon A.; Strehl, Ute; Loo, Sandra K.	2019	European Child & Adolescent Psychiatry	https://doi.org/10.1007/s00787-018-1121-4
Clinical Psychology: Neurological and Somatic Disorders	Recent advances in rehabilitation for Parkinson's disease with exergames: A systematic review	Garcia-Agundez, Augusto; Folkerts, Ann-Kristin; Konrad, Robert; Caserman, Polona; Tregel, Thomas; Goosses, Mareike; Göbel, Stefan; Kalbe, Elke	2019	Journal of NeuroEngineering and Rehabilitation, 2019	https://doi.org/10.1186/s12984-019-0492-1
Clinical Psychology: Neurological and Somatic Disorders	Efficacy, safety, and acceptability of pharmacologic treatments for pediatric migraine prophylaxis. A systematic review and network meta-analysis	Locher, Cosima; Kossowsky, Joe; Koechlin, Helen; Lam, Thanh Lan; Barthel, Johannes; Berde, Charles B.; Gaab, Jens; Schwarzer, Guido; Linde, Klaus; Meissner, Karin	2020	JAMA Pediatrics	https://doi.org/10.1001/jamapediatrics.2019.5856
Clinical Psychology: Neurological and Somatic Disorders	Standard urotherapy as first-line intervention for daytime incontinence: A meta-analysis	Schaefer, S. K.; Pospeschill, M.; Becker, N.; Equit, M.; Niemczyk, J.; von Gontard, A.	2018	European Child & Adolescent Psychiatry	https://doi.org/10.1007/s00787-017-1051-6
Clinical Psychology: Neurological and Somatic Disorders	A systematic review and network meta-analysis of randomized controlled trials evaluating the evidence base of melatonin, light exposure, exercise, and complementary and alternative medicine for patients with insomnia disorder	Baglioni, Chiara; Bostanova, Zarina; Bacaro, Valeria; Benz, Fee; Hertenstein, Elisabeth; Spiegelhalder, Kai; Rücker, Gerta; Frase, Lukas; Riemann, Dieter; Feige, Bernd	2020	Journal of Clinical Medicine, 2020	https://doi.org/10.3390/jcm9061949
Clinical Psychology: Neurological and Somatic Disorders	Antidepressants vs. placebo for the treatment of functional gastrointestinal disorders in adults: A systematic review and meta-analysis	Xiong, Nana; Duan, Yanping; Wei, Jing; Mewes, Ricarda; Leonhart, Rainer	2018	Frontiers in Psychiatry, 2018	https://doi.org/10.3389/fpsyt.2018.00659
Clinical Psychology: Neurological and Somatic Disorders	Efficacy, acceptability and safety of Internet-delivered psychological therapies for fibromyalgia syndrome: A systematic review and meta-analysis of randomized controlled trials	Bernardy, K.; Klose, P.; Welsch, P.; Häuser, W.	2019	European Journal of Pain	https://doi.org/10.1002/ejp.1284
Clinical Psychology: Neurological and Somatic Disorders	Are invasive procedures effective for chronic pain? A systematic review	Jonas, Wayne B.; Crawford, Cindy; Colloca, Luana; Kriston, Levente; Linde, Klaus; Moseley, Bruce; Meissner, Karin	2019	Pain Medicine	https://doi.org/10.1093/pm/pny154
Clinical Psychology: Neurological and Somatic Disorders	The effects of patients' expectations on surgery outcome in total hip and knee arthroplasty: A prognostic factor meta-analysis	Laferton, Johannes A. C.; Oeltjen, Lara; Neubauer, Karolin; Ebert, David D.; Munder, Thomas	2020	Health Psychology Review	https://doi.org/10.1080/17437199.2020.1854051
Clinical Psychology: Neurological and Somatic Disorders	Gender differences in self-reported family history of cancer: A review and secondary data analysis	Sieverding, Monika; Arbogast, Anna Lisa; Zintel, Stephanie; von Wagner, Christian	2020	Cancer Medicine	https://doi.org/10.1002/cam4.3405
Clinical Psychology: Neurological and Somatic Disorders	A meta-synthesis of studies of patients' experience of living with terminal cancer	Willig, Carla; Wirth, Luisa	2018	Health Psychology	https://doi.org/10.1037/hea0000581
Clinical Psychology: Neurological and Somatic Disorders	Statistical analysis of patient-reported outcome data in randomised controlled trials of locally advanced and metastatic breast cancer: A systematic review	Pe, Madeline; Dorme, Lien; Coens, Corneel; Basch, Ethan; Calvert, Melanie; Campbell, Alicyn; Cleeland, Charles; Cocks, Kim; Collette, Laurence; Dirven, Linda; Dueck, Amylou C.; Devlin, Nancy; Flechtner, Hans-Henning; Gotay, Carolyn; Griebsch, Ingolf; Groenvold, Mogens; King, Madeleine; Koller, Michael; Malone, Daniel C.; Martinelli, Francesca; Mitchell, Sandra A.; Musoro, Jammbe Z.; Piault-Louis,…	2018	The Lancet Oncology, 2018	https://doi.org/10.1016/S1470-2045(18)30418-2
Clinical Psychology: Neurological and Somatic Disorders	Palliative care initiation in pediatric oncology patients: A systematic review	Cheng, Brian T.; Rost, Michael; De Clercq, Eva; Arnold, Louisa; Elger, Bernice S.; Wangmo, Tenzin	2019	Cancer Medicine	https://doi.org/10.1002/cam4.1907
Clinical Psychology: Neurological and Somatic Disorders	Research on cognitive and sociocognitive functions in patients with brain tumours: A bibliometric analysis and visualization of the scientific landscape	Pertz, Milena; Popkirov, Stoyan; Schlegel, Uwe; Thoma, Patrizia	2020	Neurological Sciences	https://doi.org/10.1007/s10072-020-04276-x
Clinical Psychology: Neurological and Somatic Disorders	Systematic review of patient-reported outcome measures in graft-versus-host disease	Kilgour, James M.; Wali, Gorav; Gibbons, Elizabeth; Scherwath, Angela; Badiella, Anna Barata; Peniket, Andy; Schoemans, Helene; Matin, Rubeta N.	2020	Biology of Blood and Marrow Transplantation, 2020	https://doi.org/10.1016/j.bbmt.2020.01.022
Clinical Psychology: Neurological and Somatic Disorders	Health-related quality of life in cutaneous lymphomas: Past, present and future	Jonak, Constanze; Porkert, Stefanie; Oerlemans, Simone; Papadavid, Evangelia; Molloy, Kevin; Lehner-Baumgartner, Eva; Cozzio, Antonio; Efficace, Fabio; Scarisbrick, Julia	2019	Acta Dermato-Venereologica	https://doi.org/10.2340/00015555-3171
Clinical Psychology: Neurological and Somatic Disorders	Psychological interventions targeting partners of cancer patients: A systematic review	Kleine, Anne-Kathrin; Hallensleben, Nina; Mehnert, Anja; Hönig, Klaus; Ernst, Jochen	2019	Critical Reviews in Oncology/Hematology	https://doi.org/10.1016/j.critrevonc.2019.05.008
Clinical Psychology: Neurological and Somatic Disorders	Exercise interventions in children and adolescents with ADHD: A systematic review	Neudecker, Christina; Mewes, Nadine; Reimers, Anne K.; Woll, Alexander	2019	Journal of Attention Disorders	https://doi.org/10.1177/1087054715584053
Clinical Psychology: Neurological and Somatic Disorders	Addressing sequelae of developmental regression associated with developmental disabilities: A systematic review of behavioral and educational intervention studies	Sigafoos, Jeff; O'Reilly, Mark F.; Ledbetter-Cho, Katherine; Lim, Nataly; Lancioni, Giulio E.; Marschik, Peter B.	2019	Neuroscience and Biobehavioral Reviews	https://doi.org/10.1016/j.neubiorev.2018.11.014
Clinical Psychology: Neurological and Somatic Disorders	Transcranial direct current stimulation in ADHD: A systematic review of efficacy, safety, and protocol-induced electrical field modeling results	Salehinejad, Mohammad Ali; Nejati, Vahid; Mosayebi-Samani, Mohsen; Mohammadi, Ali; Wischnewski, Miles; Kuo, Min-Fang; Avenanti, Alessio; Vicario, Carmelo M.; Nitsche, Michael A.	2020	Neuroscience Bulletin	https://doi.org/10.1007/s12264-020-00501-x
Clinical Psychology: Neurological and Somatic Disorders	Empirisch untersuchte entwicklungsorientierte und verhaltenstherapeutisch basierte Therapieprogramme zur Verbesserung der Kernsymptome und der Sprachentwicklung bei Klein- und Vorschulkindern mit Autismus-Spektrum-Störungen	Freitag, Christine M.; Jensen, Katrin; Teufel, Karoline; Luh, Marvin; Todorova, Antoaneta; Lalk, Christopher; Vllasaliu, Leonora	2020	Zeitschrift für Kinder- und Jugendpsychiatrie und Psychotherapie	https://doi.org/10.1024/1422-4917/a000714
Clinical Psychology: Neurological and Somatic Disorders	The multi-informant-approach in the diagnostics of child and adolescent mental disorders. Challenges in its application with the focus on self-report of externalizing disorders in early childhood	Merten, Eva Charlotte	2019		https://doi.org/10.13154/294-6572
Clinical Psychology: Neurological and Somatic Disorders	Autismus-Spektrum-Störungen und Geschlechtsdysphorie bei Kindern und Jugendlichen: Systematisches Review zur gemeinsamen Prävalenz	Herrmann, Lena; Bindt, Carola; Schweizer, Katinka; Micheel, Jan; Nieder, Timo Ole; Haaß, Judith; Schöttle, Daniel; Becker-Hebly, Inga	2020	Psychiatrische Praxis	https://doi.org/10.1055/a-1148-4873
Clinical Psychology: Neurological and Somatic Disorders	Systematic review: Overlap between eating, autism spectrum, and attention-deficit/hyperactivity disorder	Nickel, Kathrin; Maier, Simon; Endres, Dominique; Joos, Andreas; Maier, Viktoria; van Elst, Ludger Tebartz; Zeeck, Almut	2019	Frontiers in Psychiatry, 2019	https://doi.org/10.3389/fpsyt.2019.00708
Clinical Psychology: Neurological and Somatic Disorders	Motivationale Einflüsse auf exekutive Funktionen bei Aufmerksamkeitsdefizit-/ Hyperaktivitätsstörungen (ADHS). Ein systematisches Review	Lauth-Lebens, Morena; Lauth, Gerhard W.	2020	Lernen und Lernstörungen	https://doi.org/10.1024/2235-0977/a000284
Clinical Psychology: Neurological and Somatic Disorders	Effects of existential interventions on spiritual, psychological, and physical well-being in adult patients with cancer: Systematic review and meta-analysis of randomized controlled trials	Bauereiß, Natalie; Obermaier, Stefanie; Özünal, Selçuk Erol; Baumeister, Harald	2018	Psycho-Oncology	https://doi.org/10.1002/pon.4829
Clinical Psychology: Neurological and Somatic Disorders	Systematic review on the impact of intelligence on cognitive decline and dementia risk	Rodriguez, Francisca S.; Lachmann, Thomas	2020	Frontiers in Psychology, 2020	https://doi.org/10.3389/fpsyt.2020.00658
Clinical Psychology: Neurological and Somatic Disorders	The human right to make one's own choices - Implications for supported decision-making in persons with dementia. A systematic review	Wied, Theresa S.; Knebel, Maren; Tesky, Valentina A.; Haberstroh, Julia	2019	European Psychologist	https://doi.org/10.1027/1016-9040/a000372
Clinical Psychology: Neurological and Somatic Disorders	Health literacy in individuals at risk for Alzheimer's dementia: A systematic review	Rostamzadeh, Ayda; Stapels, J.; Genske, A.; Haidl, T.; Jünger, S.; Seves, M.; Woopen, C.; Jessen, F.	2020	The Journal of Prevention of Alzheimer's Disease	https://doi.org/10.14283/jpad.2019.34
Clinical Psychology: Neurological and Somatic Disorders	(Neuro)Psychological interventions for non-motor symptoms in the treatment of patients with parkinson's disease: A systematic umbrella review	Kampling, Hanna; Brendel, Lisa K.; Mittag, Oskar	2019	Neuropsychology Review	https://doi.org/10.1007/s11065-019-09409-4
Clinical Psychology: Neurological and Somatic Disorders	Visuospatial neglect - A theory-informed overview of current and emerging strategies and a systematic review on the therapeutic use of non-invasive brain stimulation	Zebhauser, Paul Theo; Vernet, Marine; Unterburger, Evelyn; Brem, Anna-Katharine	2019	Neuropsychology Review	https://doi.org/10.1007/s11065-019-09417-4
Clinical Psychology: Neurological and Somatic Disorders	Earlier versus later cognitive event-related potentials (ERPs) in attention-deficit/hyperactivity disorder (ADHD): A meta-analysis	Kaiser, Anna; Aggensteiner, Pascal-M.; Baumeister, Sarah; Holz, Nathalie E.; Banaschewski, Tobias; Brandeis, Daniel	2020	Neuroscience and Biobehavioral Reviews	https://doi.org/10.1016/j.neubiorev.2020.01.019
Clinical Psychology: Neurological and Somatic Disorders	Meta-meta-analysis on the effectiveness of parent-based interventions for the treatment of child externalizing behavior problems	Mingebach, Tanja; Kamp-Becker, Inge; Christiansen, Hanna; Weber, Linda	2018	PLoS ONE, 2018	https://doi.org/10.1371/journal.pone.0202855
Clinical Psychology: Neurological and Somatic Disorders	Multisensory temporal binding window in autism spectrum disorders and schizophrenia spectrum disorders: A systematic review and meta-analysis	Zhou, Han-yu; Cai, Xin-lu; Weigl, Michael; Bang, Peter; Cheung, Eric F. C.; Chan, Raymond C. K.	2018	Neuroscience and Biobehavioral Reviews	https://doi.org/10.1016/j.neubiorev.2017.12.013
Clinical Psychology: Neurological and Somatic Disorders	Transcranial direct current stimulation in attention-deficit hyperactivity disorder: A meta-analysis of neuropsychological deficits	Salehinejad, Mohammad Ali; Wischnewski, Miles; Nejati, Vahid; Vicario, Carmelo M.; Nitsche, Michael A.	2019	PLoS ONE, 2019	https://doi.org/10.1371/journal.pone.0215095
Clinical Psychology: Neurological and Somatic Disorders	Discovery of the first genome-wide significant risk loci for attention deficit/hyperactivity disorder	Demontis, Ditte; Walters, Raymond K.; Martin, Joanna; Mattheisen, Manuel; Als, Thomas D.; Agerbo, Esben; Baldursson, Gisli; Belliveau, Rich; Bybjerg-Grauholm, Jonas; Cerrato, Felecia; Chambert, Kimberly; Churchhouse, Claire; Dumont, Ashley; Eriksson, Nicholas; Gandal, Michael; Goldstein, Jacqueline I.; Grasby, Katrina L.; Grove, Jakob; Gudmundsson, Olafur O.; Hansen, Christine S.; Hauberg, Mads E…	2019	Nature Genetics	https://doi.org/10.1038/s41588-018-0269-7
Clinical Psychology: Neurological and Somatic Disorders	Metaanalyse zur Wirksamkeit achtsamkeitsbasierter Interventionen bei ADHS im Kindes- und Jugendalter	Linderkamp, Friedrich; Lüdeke, Sören	2019	Kindheit und Entwicklung	https://doi.org/10.1026/0942-5403/a000278
Clinical Psychology: Neurological and Somatic Disorders	A multicohort, longitudinal study of cerebellar development in attention deficit hyperactivity disorder	Shaw, Philip; Ishii-Takahashi, Ayaka; Park, Min Tae; Devenyi, Gabriel A.; Zibman, Chava; Kasparek, Steven; Sudre, Gustavo; Mangalmurti, Aman; Hoogman, Martine; Tiemeier, Henning; von Polier, Georg; Shook, Devon; Muetzel, Ryan; Chakravarty, M. Mallar; Konrad, Kerstin; Durston, Sarah; White, Tonya	2018	Journal of Child Psychology and Psychiatry	https://doi.org/10.1111/jcpp.12920
Clinical Psychology: Neurological and Somatic Disorders	Impaired interparental relationships in families of children with attention-deficit/hyperactivity disorder (ADHD). A meta-analysis	Weyers, Lena; Zemp, Martina; Alpers, Georg W.	2019	Zeitschrift für Psychologie	https://www.hogrefe.de/produkte/zeitschriften/zfp
Clinical Psychology: Neurological and Somatic Disorders	Comparative efficacy and tolerability of medications for attention-deficit hyperactivity disorder in children, adolescents, and adults: A systematic review and network meta-analysis	Cortese, Samuele; Adamo, Nicoletta; Del Giovane, Cinzia; Mohr-Jensen, Christina; Hayes, Adrian J.; Carucci, Sara; Atkinson, Lauren Z.; Tessari, Luca; Banaschewski, Tobias; Coghill, David; Hollis, Chris; Simonoff, Emily; Zuddas, Alessandro; Barbui, Corrado; Purgato, Marianna; Steinhausen, Hans-Christoph; Shokraneh, Farhad; Xia, Jun; Cipriani, Andrea	2018	The Lancet Psychiatry	https://doi.org/10.1016/S2215-0366(18)30269-4
Clinical Psychology: Neurological and Somatic Disorders	Emotion dysregulation in adults with attention deficit hyperactivity disorder: A meta-analysis	Beheshti, Ashkan; Chavanon, Mira-Lynn; Christiansen, Hanna	2020	BMC Psychiatry, 2020	https://doi.org/10.1186/s12888-020-2442-7
Clinical Psychology: Neurological and Somatic Disorders	Psychological resilience during the perimenopause	Süss, Hannah; Ehlert, Ulrike	2020	Maturitas	https://doi.org/10.1016/j.maturitas.2019.10.015
Clinical Psychology: Neurological and Somatic Disorders	Sleep disorders in migrants and refugees: A systematic review with implications for personalized medical approach	Richter, Kneginja; Baumgärtner, Lisa; Niklewski, Günter; Peter, Lukas; Köck, Melanie; Kellner, Stefanie; Hillemacher, Thomas; Büttner-Teleaga, Antje	2020	EPMA Journal	https://doi.org/10.1007/s13167-020-00205-2
Clinical Psychology: Neurological and Somatic Disorders	Outcome measures for assessing the effectiveness of non-pharmacological interventions in frequent episodic or chronic migraine: A Delphi study	Luedtke, Kerstin; Basener, Annika; Bedei, Stephanie; Castien, Rene; Chaibi, Aleksander; Falla, Deborah; Fernández-de-las-Peñas, Cesar; Gustafsson, Mirja; Hall, Toby; Jull, Gwen; Kropp, Peter; Madsen, Bjarne K.; Schaefer, Benjamin; Seng, Elizabeth; Steen, Claudia; Tuchin, Peter; von Piekartz, Harry; Wollesen, Bettina	2020	BMJ Open, 2020	https://doi.org/10.1136/bmjopen-2019-029855
Clinical Psychology: Neurological and Somatic Disorders	Physiotherapy management of patients with chronic pelvic pain (CPP): A systematic review	Klotz, Susanne G. R.; Schön, Mila; Ketels, Gesche; Löwe, Bernd; Brünahl, Christian A.	2019	Physiotherapy Theory and Practice	https://doi.org/10.1080/09593985.2018.1455251
Clinical Psychology: Neurological and Somatic Disorders	Smartphone apps in the context of tinnitus: Systematic review	Mehdi, Muntazir; Riha, Constanze; Neff, Patrick; Dode, Albi; Pryss, Rüdiger; Schlee, Winfried; Reichert, Manfred; Hauck, Franz J.	2020	Sensors, 2020	https://doi.org/10.3390/s20061725
Clinical Psychology: Neurological and Somatic Disorders	Which symptoms, complaints and complications of the gastrointestinal tract occur in patients with eating disorders? A systematic review and quantitative analysis	Riedlinger, Caroline; Schmidt, Greta; Weiland, Alisa; Stengel, Andreas; Giel, Katrin Elisabeth; Zipfel, Stephan; Enck, Paul; Mack, Isabelle	2020	Frontiers in Psychiatry, 2020	https://doi.org/10.3389/fpsyt.2020.00195
Clinical Psychology: Neurological and Somatic Disorders	Internet-based interventions in chronic somatic disease	Bendig, Eileen; Bauereiß, Natalie; Ebert, David Daniel; Snoek, Frank; Andersson, Gerhard; Baumeister, Harald	2018	Deutsches Ärzteblatt International	https://doi.org/10.3238/arztebl.2018.0659
Clinical Psychology: Neurological and Somatic Disorders	Developing a core outcome domain set to assessing effectiveness of interdisciplinary multimodal pain therapy: The VAPAIN consensus statement on core outcome domains	Kaiser, Ulrike; Kopkow, Christian; Deckert, Stefanie; Neustadt, Katrin; Jacobi, Lena; Cameron, Paul; De Angelis, Valerio; Apfelbacher, Christian; Arnold, Bernhard; Birch, Judy; Bjarnegard, Anna; Christiansen, Sandra; de C Williams, Amanda C; Gossrau, Gudrun; Heinks, Andrea; Hüppe, Michael; Kiers, Henri; Kleinert, Ursula; Martelletti, Paolo; McCracken, Lance; de Meij, Nelleke; Nagel, Bernd; Nijs, …	2018	Pain	https://doi.org/10.1097/j.pain.0000000000001129
Clinical Psychology: Neurological and Somatic Disorders	Chronic non-specific low back pain and motor control during gait	Koch, Cathrin; Hansel, Frank	2018	Frontiers in Psychology, 2018	https://doi.org/10.3389/fpsyg.2018.02236
Clinical Psychology: Neurological and Somatic Disorders	Depression in somatic disorders: Is there a beneficial effect of exercise?	Roeh, Astrid; Kirchner, Sophie K.; Malchow, Berend; Maurus, Isabel; Schmitt, Andrea; Falkai, Peter; Hasan, Alkomiet	2019	Frontiers in Psychiatry, 2019	https://doi.org/10.3389/fpsyt.2019.00141
Clinical Psychology: Neurological and Somatic Disorders	Management of comorbid mental and somatic disorders in stepped care approaches in primary care: A systematic review	Maehder, Kerstin; Löwe, Bernd; Härter, Martin; Heddaeus, Daniela; Scherer, Martin; Weigel, Angelika	2019	Family Practice	https://doi.org/10.1093/fampra/cmy122
Clinical Psychology: Neurological and Somatic Disorders	Measuring anger in patients experiencing chronic pain - A systematic review	Sommer, Isabelle; Lukic, Nenad; Rössler, Wulf; Ettlin, Dominik A.	2019	Journal of Psychosomatic Research, 2019	https://doi.org/10.1016/j.jpsychores.2019.109778
Clinical Psychology: Neurological and Somatic Disorders	Symptoms assessed in studies on perimenopausal depression: A narrative review	Willi, Jasmine; Ehlert, Ulrike	2020	Sexual & Reproductive Healthcare, 2020	https://doi.org/10.1016/j.srhc.2020.100559
Clinical Psychology: Neurological and Somatic Disorders	Interventions for sleep problems during pregnancy: A systematic review	Bacaro, Valeria; Benz, Fee; Pappaccogli, Andrea; De Bartolo, Paola; Johann, Anna F.; Palagini, Laura; Lombardo, Caterina; Feige, Bernd; Riemann, Dieter; Baglioni, Chiara	2020	Sleep Medicine Reviews, 2020	https://doi.org/10.1016/j.smrv.2019.101234
Clinical Psychology: Neurological and Somatic Disorders	Neuroimaging insights into the link between depression and Insomnia: A systematic review	Bagherzadeh-Azbari, Shadi; Khazaie, Habibolah; Zarei, Mojtaba; Spiegelhalder, Kai; Walter, Martin; Leerssen, Jeanne; Van Someren, Eus J. W.; Sepehry, Amir A.; Tahmasian, Masoud	2019	Journal of Affective Disorders	https://doi.org/10.1016/j.jad.2019.07.089
Clinical Psychology: Neurological and Somatic Disorders	A systematic review and meta-analysis of the relationship between brain data and the outcome in disorders of consciousness	Kotchoubey, Boris; Pavlov, Yuri G.	2018	Frontiers in Neurology, 2018	https://doi.org/10.3389/fneur.2018.00315
Clinical Psychology: Neurological and Somatic Disorders	Mild cognitive impairment disrupts attention network connectivity in Parkinson's disease: A combined multimodal MRI and meta-analytical study	Bezdicek, Ondrej; Ballarini, Tommaso; Ruzicka, Filip; Roth, Jan; Mueller, Karsten; Jech, Robert; Schroeter, Matthias L.	2018	Neuropsychologia	https://doi.org/10.1016/j.neuropsychologia.2018.03.011
Clinical Psychology: Neurological and Somatic Disorders	A meta-analysis of inhibitory-control deficits in patients diagnosed with Alzheimer's dementia	Kaiser, Anna; Kuhlmann, Beatrice G.; Bosnjak, Michael	2018	Neuropsychology	https://doi.org/10.1037/neu0000460
Clinical Psychology: Neurological and Somatic Disorders	Does depression after stroke negatively influence physical disability? A systematic review and meta-analysis of longitudinal studies	Blöchl, Maria; Meissner, Sophie; Nestler, Steffen	2019	Journal of Affective Disorders	https://doi.org/10.1016/j.jad.2018.12.082
Clinical Psychology: Neurological and Somatic Disorders	Confining the concept of vascular depression to late-onset depression: A meta-analysis of MRI-defined hyperintensity burden in major depressive disorder and bipolar disorder	Salo, Katharina, I; Scharfen, Jana; Wilden, Isabelle D.; Schubotz, Ricarda, I; Holling, Heinz	2019	Frontiers in Psychology, 2019	https://doi.org/10.3389/fpsyg.2019.01241
Clinical Psychology: Neurological and Somatic Disorders	Meta-analysis of anxiety in parents of young people with chronic health conditions	Pinquart, Martin	2019	Journal of Pediatric Psychology	https://doi.org/10.1093/jpepsy/jsz024
Clinical Psychology: Neurological and Somatic Disorders	Insomnia as a predictor of mental disorders: A systematic review and meta-analysis	Hertenstein, Elisabeth; Feige, Bernd; Gmeiner, Tabea; Kienzler, Christian; Spiegelhalder, Kai; Johann, Anna; Jansson-Fröjmark, Markus; Palagini, Laura; Rücker, Gerta; Riemann, Dieter; Baglioni, Chiara	2019	Sleep Medicine Reviews	https://doi.org/10.1016/j.smrv.2018.10.006
Clinical Psychology: Neurological and Somatic Disorders	Brief psychosocial interventions improve quality of life of patients receiving palliative care: A systematic review and meta-analysis	Warth, Marco; Kessler, Jens; Koehler, Friederike; Aguilar-Raab, Corina; Bardenheuer, Hubert J.; Ditzen, Beate	2019	Palliative Medicine	https://doi.org/10.1177/0269216318818011
Clinical Psychology: Neurological and Somatic Disorders	Efficacy, acceptability and safety of cognitive behavioural therapies in fibromyalgia syndrome - A systematic review and meta-analysis of randomized controlled trials	Bernardy, K.; Klose, P.; Welsch, P.; Häuser, W.	2018	European Journal of Pain	https://doi.org/10.1002/ejp.1121
Clinical Psychology: Neurological and Somatic Disorders	Alcohol use disorders and the risk of progression of liver disease in people with hepatitis C virus infection - a systematic review	Llamosas-Falcón, Laura; Shield, Kevin D.; Gelovany, Maya; Manthey, Jakob; Rehm, Jürgen	2020	Substance Abuse Treatment, Prevention, and Policy, 2020	https://doi.org/10.1186/s13011-020-00287-1
Clinical Psychology: Neurological and Somatic Disorders	Behaviour change techniques applied in interventions to enhance physical activity adherence in patients with chronic musculoskeletal conditions: A systematic review and meta-analysis	Eisele, Angelika; Schagg, Daniela; Krämer, Lena Violetta; Bengel, Jürgen; Göhnera, Wiebke	2019	Patient Education and Counseling	https://doi.org/10.1016/j.pec.2018.09.018
Clinical Psychology: Neurological and Somatic Disorders	Do 8-to 18-year-old children/adolescents with chronic physical health conditions have worse health-related quality of life than their healthy peers? A meta-analysis of studies using the KIDSCREEN questionnaires	Silva, Neuza; Pereira, Marco; Otto, Christiane; Ravens-Sieberer, Ulrike; Canavarro, Maria Cristina; Bullinger, Monika	2019	Quality of Life Research	https://doi.org/10.1007/s11136-019-02189-7
Clinical Psychology: Neurological and Somatic Disorders	The effectiveness of behavioural and cognitive behavioural therapies for insomnia on depressive and fatigue symptoms: A systematic review and network meta-analysis	Ballesio, Andrea; Aquino, Maria Raisa Jessica V.; Feige, Bernd; Johann, Anna F.; Kyle, Simon D.; Spiegelhalder, Kai; Lombardo, Caterina; Rücker, Gerta; Riemann, Dieter; Baglioni, Chiara	2018	Sleep Medicine Reviews	https://doi.org/10.1016/j.smrv.2017.01.006
Clinical Psychology: Neurological and Somatic Disorders	Wie beeinflussen Misshandlungserfahrungen im Kindesalter das Erleben von chronischen Schmerzen im Erwachsenenalter? - Eine Metaanalyse	Savluk, Lidia; Petermann, Franz; Vasileva, Mira	2019	Zeitschrift für Psychiatrie, Psychologie und Psychotherapie	https://doi.org/10.1024/1661-4747/a000376
Clinical Psychology: Neurological and Somatic Disorders	Zusammenhang von Resilienz und psychischer Gesundheit bei körperlichen Erkrankungen. Systematisches Review und Metaanalyse	Färber, Francesca; Rosendahl, Jenny	2018	Deutsches Ärzteblatt	https://www.aerzteblatt.de/
Clinical Psychology: Neurological and Somatic Disorders	Is healthy neuroticism associated with chronic conditions? A coordinated integrative data analysis	Weston, Sara J.; Graham, Eileen K.; Turiano, Nicholas A.; Aschwanden, Damaris; Booth, Tom; Harrison, Fleur; James, Bryan D.; Lewis, Nathan A.; Makkar, Steven R.; Mueller, Swantje; Wisniewski, Kristi M.; Yoneda, Tomiko; Zhaoyang, Ruixue; Spiro, Avron; Drewelies, Johanna; Wagner, Gert G.; Steinhagen-Thiessen, Elisabeth; Demuth, Ilja; Willis, Sherry; Schaie, K. Warner; Sliwinski, Martin; Lipton, Ric…	2020	Collabra: Psychology, 2020	https://doi.org/10.1525/collabra.267
Clinical Psychology: Neuroses & Anxiety Disorders	Exploring the association of social comparison with depression and anxiety: A systematic review and meta-analysis	McCarthy, Peter A.; Morina, Nexhmedin	2020	Clinical Psychology and Psychotherapy	https://doi.org/10.1002/cpp.2452
Clinical Psychology: Neuroses & Anxiety Disorders	Psychiatric and psychosomatic consultation-liaison services in general hospitals: A systematic review and meta-analysis of effects on symptoms of depression and anxiety	Stein, Barbara; Müller, Markus M.; Meyer, Lisa K.; Söllner, Wolfgang; Merkle, Wolfgang; Hannich, Hans-Joachim; Kern-Ehrlich, Alexander; Moelein-Teising, Ingrid; Weidner, Kerstin; Vitinius, Frank; Fazekas, Christian; Jenewein, Josef	2020	Psychotherapy and Psychosomatics	https://doi.org/10.1159/000503177
Clinical Psychology: Neuroses & Anxiety Disorders	Efficacy of group psychotherapy for anxiety disorders: A systematic review and meta-analysis	Barkowski, Sarah; Schwartze, Dominique; Strauss, Bernhard; Burlingame, Gary M.; Rosendahl, Jenny	2020	Psychotherapy Research	https://doi.org/10.1080/10503307.2020.1729440
Clinical Psychology: Neuroses & Anxiety Disorders	Sedentary behaviors and anxiety among children, adolescents and adults: A systematic review and meta-analysis	Stanczykiewicz, Bartlomiej; Banik, Anna; Knoll, Nina; Keller, Jan; Hohl, Diana Hilda; Rosinczuk, Joanna; Luszczynska, Aleksandra	2019	BMC Public Health, 2019	https://doi.org/10.1186/s12889-019-6715-3
Clinical Psychology: Neuroses & Anxiety Disorders	Effects of Internet-based cognitive behavioral therapy in routine care for adults in treatment for depression and anxiety: Systematic review and meta-analysis	Etzelmueller, Anne; Vis, Christiaan; Karyotaki, Eirini; Baumeister, Harald; Titov, Nickolai; Berking, Matthias; Cuijpers, Pim; Riper, Heleen; Ebert, David Daniel	2020	Journal of Medical Internet Research, 2020	https://doi.org/10.2196/18100
Clinical Psychology: Neuroses & Anxiety Disorders	Systematic review and meta-analysis: Cognitive-behavioral therapy for obsessive-compulsive disorder in children and adolescents	Funch Uhre, Camilla; Funch Uhre, Valdemar; Lonfeldt, Nicole Nadine; Pretzmann, Linea; Vangkilde, Signe; Plessen, Kerstin Jessica; Gluud, Christian; Jakobsen, Janus Christian; Pagsberg, Anne Katrine	2020	Journal of the American Academy of Child and Adolescent Psychiatry	https://doi.org/10.1016/j.jaac.2019.08.480
Clinical Psychology: Neuroses & Anxiety Disorders	Dysfunctional cognition and self-efficacy as mediators of symptom change in exposure therapy for agoraphobia - Systematic review and meta-analysis	Breuninger, Christoph; Tuschen-Caffier, Brunna; Svaldi, Jennifer	2019	Behaviour Research and Therapy, 2019	https://doi.org/10.1016/j.brat.2019.103443
Clinical Psychology: Neuroses & Anxiety Disorders	The erring brain: Error-related negativity as an endophenotype for OCD-A review and meta-analysis	Riesel, Anja	2019	Psychophysiology, 2019	https://doi.org/10.1111/psyp.13348
Clinical Psychology: Neuroses & Anxiety Disorders	Inferiority or even superiority of virtual reality exposure therapy in phobias? - A systematic review and quantitative meta-analysis on randomized controlled trials specifically comparing the efficacy of virtual reality exposure to gold standard in vivo exposure in agoraphobia, specific phobia, and social phobia	Wechsler, Theresa F.; Kümpers, Franziska; Mühlberger, Andreas	2019	Frontiers in Psychology, 2019	https://doi.org/10.3389/fpsyg.2019.01758
Clinical Psychology: Neuroses & Anxiety Disorders	Catastrophic misinterpretation of bodily sensations and external events in panic disorder, other anxiety disorders, and healthy subjects: A systematic review and meta-analysis	Ohst, Barnabas; Tuschen-Caffier, Brunna	2018	PLoS ONE, 2018	https://doi.org/10.1371/journal.pone.0194493
Clinical Psychology: Neuroses & Anxiety Disorders	A systematic review on the therapeutic effectiveness of non-invasive brain stimulation for the treatment of anxiety disorders	Vicario, C. M.; Salehinejad, Mohammad Ali; Felmingham, K.; Martino, G.; Nitsche, M. A.	2019	Neuroscience and Biobehavioral Reviews	https://doi.org/10.1016/j.neubiorev.2018.12.012
Clinical Psychology: Neuroses & Anxiety Disorders	Metabolomic biomarkers in anxiety disorders	Humer, Elke; Pieh, Christoph; Probst, Thomas	2020	International Journal of Molecular Sciences, 2020	https://doi.org/10.3390/ijms21134784
Clinical Psychology: Neuroses & Anxiety Disorders	Mediators in psychological and psychoeducational interventions for the prevention of depression and anxiety. A systematic review	Moreno-Peral, Patricia; Ángel Bellón, Juan; Huibers, Marcus J. H.; Mestre, José M.; Joaquín García-López, Luís; Taubner, Svenja; Rodríguez-Morejón, Alberto; Bolinski, Felix; Sales, Célia M. D.; Conejo-Cerón, Sonia	2020	Clinical Psychology Review, 2020	https://doi.org/10.1016/j.cpr.2020.101813
Clinical Psychology: Neuroses & Anxiety Disorders	Fear of pain and pain intensity: Meta-analysis and systematic review	Markfelder, Tobias; Pauli, Paul	2020	Psychological Bulletin	https://doi.org/10.1037/bul0000228
Clinical Psychology: Neuroses & Anxiety Disorders	Performance anxiety in professional musicians: A systematic review on prevalence, risk factors and clinical treatment effects	Fernholz, I.; Mumm, J. L. M.; Plag, J.; Noeres, K.; Rotter, G.; Willich, S. N.; Ströhle, A.; Berghöfer, A.; Schmidt, A.	2019	Psychological Medicine	https://doi.org/10.1017/S0033291719001910
Clinical Psychology: Neuroses & Anxiety Disorders	Mega-analysis methods in ENIGMA: The experience of the generalized anxiety disorder working group	Zugman, André; Harrewijn, Anita; Cardinale, Elise M.; Zwiebel, Hannah; Freitag, Gabrielle F.; Werwath, Katy E.; Bas-Hoogendam, Janna M.; Groenewold, Nynke A.; Aghajani, Moji; Hilbert, Kevin; Cardoner, Narcis; Porta-Casteràs, Daniel; Gosnell, Savannah; Salas, Ramiro; Blair, Karina S.; Blair, James R.; Hammoud, Mira Z.; Milad, Mohammed; Burkhouse, Katie; Phan, K. Luan; Schroeder, Heidi K.; Strawn, …	2020	Human Brain Mapping	https://doi.org/10.1002/hbm.25096
Clinical Psychology: Neuroses & Anxiety Disorders	Age of anxiety and depression revisited: A meta-analysis of two European community samples (1964-2015)	Schürmann, Jan; Margraf, Jürgen	2018	International Journal of Clinical and Health Psychology	https://doi.org/10.1016/j.ijchp.2018.02.002
Clinical Psychology: Neuroses & Anxiety Disorders	Is there a sleeper effect of exposure-based vs. cognitive-only intervention for anxiety disorders? A longitudinal multilevel meta-analysis	Podina, Ioana R.; Vîsla, Andreea; Fodor, Liviu A.; Flückiger, Christoph	2019	Clinical Psychology Review, 2019	https://doi.org/10.1016/j.cpr.2019.101774
Clinical Psychology: Neuroses & Anxiety Disorders	Internet- and mobile-based interventions for anxiety disorders: A meta-analytic review of intervention components	Domhardt, Matthias; Geßlein, Helene; von Rezori, Roman E.; Baumeister, Harald	2019	Depression and Anxiety	https://doi.org/10.1002/da.22860
Clinical Psychology: Neuroses & Anxiety Disorders	Anxiety as a risk factor of Alzheimer's disease and vascular dementia	Becker, Eva; Rios, Claudia Lorena Orellana; Lahmann, Claas; Rücker, Gerta; Bauer, Joachim; Boeker, Martin	2018	British Journal of Psychiatry	https://doi.org/10.1192/bjp.2018.173
Clinical Psychology: Neuroses & Anxiety Disorders	A genome-wide association meta-analysis of prognostic outcomes following cognitive behavioural therapy in individuals with anxiety and depressive disorders	Rayner, Christopher; Coleman, Jonathan R. I.; Purves, Kirstin L.; Hodsoll, John; Goldsmith, Kimberley; Alpers, Georg W.; Andersson, Evelyn; Arolt, Volker; Boberg, Julia; Bögels, Susan; Creswell, Cathy; Cooper, Peter; Curtis, Charles; Deckert, Jürgen; Domschke, Katharina; El Alaoui, Samir; Fehm, Lydia; Fydrich, Thomas; Gerlach, Alexander L.; Grocholewski, Anja; Hahlweg, Kurt; Hamm, Alfons; Hedman,…	2019	Translational Psychiatry, 2019	https://doi.org/10.1038/s41398-019-0481-y
Clinical Psychology: Neuroses & Anxiety Disorders	Dismantling cognitive-behaviour therapy for panic disorder: A systematic review and component network meta-analysis	Pompoli, Alessandro; Furukawa, Toshi A.; Efthimiou, Orestis; Imai, Hissei; Tajika, Aran; Salanti, Georgia	2018	Psychological Medicine	https://doi.org/10.1017/S0033291717003919
Clinical Psychology: Neuroses & Anxiety Disorders	Enduring effects of psychological treatments for anxiety disorders: Meta-analysis of follow-up studies	Bandelow, Borwin; Sagebiel, Anne; Belz, Michael; Görlich, Yvonne; Michaelis, Sophie; Wedekind, Dirk	2018	British Journal of Psychiatry	https://doi.org/10.1192/bjp.2018.49
Clinical Psychology: Neuroses & Anxiety Disorders	"Attention bias" für sozial-bedrohliche Reize bei körperbezogenen Sorgen. Systematischer Review	Wambach, Laura; Schmidt, Jennifer	2020	Psychotherapeut	https://doi.org/10.1007/s00278-020-00406-0
Clinical Psychology: Neuroses & Anxiety Disorders	Towards an evidence-based unified psychodynamic protocol for emotional disorders	Leichsenring, Falk; Steinert, Christiane	2018	Journal of Affective Disorders	https://doi.org/10.1016/j.jad.2017.11.036
Clinical Psychology: Neuroses & Anxiety Disorders	Factors influencing the success of exposure therapy for specific phobia: A systematic review	Böhnlein, Joscha; Altegoer, Luisa; Muck, Nina Kristin; Roesmann, Kati; Redlich, Ronny; Dannlowski, Udo; Leehr, Elisabeth J.	2020	Neuroscience and Biobehavioral Reviews	https://doi.org/10.1016/j.neubiorev.2019.12.009
Clinical Psychology: Neuroses & Anxiety Disorders	The resilient emotional brain: A scoping review of the medial prefrontal cortex and limbic structure and function in resilient adults with a history of childhood maltreatment	Moreno-López, Laura; Ioannidis, Konstantinos; Askelund, Adrian Dahl; Smith, Alicia J.; Schueler, Katja; Van Harmelen, Anne-Laura	2020	Biological Psychiatry: Cognitive Neuroscience and Neuroimaging	https://doi.org/10.1016/j.bpsc.2019.12.008
Clinical Psychology: Neuroses & Anxiety Disorders	Association of depression and anxiety disorders with autoimmune thyroiditis: A systematic review and meta-analysis	Siegmann, Eva-Maria; Müller, Helge H. O.; Luecke, Caroline; Philipsen, Alexandra; Kornhuber, Johannes; Grömer, Teja Wolfgang	2018	JAMA Psychiatry	https://doi.org/10.1001/jamapsychiatry.2018.0190
Clinical Psychology: Neuroses & Anxiety Disorders	Frontoparietal areas link impairments of large-scale intrinsic brain networks with aberrant fronto-striatal interactions in OCD: A meta-analysis of resting-state functional connectivity	Gürsel, Deniz A.; Avram, Mihai; Sorg, Christian; Brandl, Felix; Koch, Kathrin	2018	Neuroscience and Biobehavioral Reviews	https://doi.org/10.1016/j.neubiorev.2018.01.016
Clinical Psychology: Neuroses & Anxiety Disorders	Impaired antisaccades in obsessive-compulsive disorder: Evidence from meta-analysis and a large empirical study	Bey, Katharina; Lennertz, Leonhard; Grützmann, Rosa; Heinzel, Stephan; Kaufmann, Christian; Klawohn, Julia; Riesel, Anja; Meyhöfer, Inga; Ettinger, Ulrich; Kathmann, Norbert; Wagner, Michael	2018	Frontiers in Psychiatry, 2018	https://doi.org/10.3389/fpsyt.2018.00284
Clinical Psychology: Neuroses & Anxiety Disorders	An empirical comparison of meta- and mega-analysis with data from the ENIGMA obsessive-compulsive disorder working group	Boedhoe, Premika S. W.; Heymans, Martijn W.; Schmaal, Lianne; Abe, Yoshinari; Alonso, Pino; Ameis, Stephanie H.; Anticevic, Alan; Arnold, Paul D.; Batistuzzo, Marcelo C.; Benedetti, Francesco; Beucke, Jan C.; Bollettini, Irene; Bose, Anushree; Brem, Silvia; Calvo, Anna; Calvo, Rosa; Cheng, Yuqi; Cho, Kang Ik K.; Ciullo, Valentina; Dallaspezia, Sara; Denys, Damiaan; Feusner, Jamie D.; Fitzgerald, …	2019	Frontiers in Neuroinformatics, 2019	https://doi.org/10.3389/fninf.2018.00102
Clinical Psychology: Neuroses & Anxiety Disorders	A quantitative meta-analysis of fMRI studies investigating emotional processing in excessive worriers: Application of activation likelihood estimation analysis	Weber-Goericke, Fanny; Muehlhan, Markus	2019	Journal of Affective Disorders	https://doi.org/10.1016/j.jad.2018.09.049
Clinical Psychology: Neuroses & Anxiety Disorders	Deterioration rates in Virtual Reality Therapy: An individual patient data level meta-analysis	Fernández-Álvareza, Javier; Rozental, Alexander; Carlbring, Per; Colombo, Desirée; Riva, Giuseppe; Anderson, Page L.; Baños, Rosa María; Benbow, Amanda A.; Bouchard, Stéphane; Bretón-López, Juana María; Cárdenas, Georgina; Difede, JoAnn; Emmelkamp, Paul; García-Palacios, Azucena; Guillén, Verónica; Hoffman, Hunter; Kampann, Isabel; Moldovan, Ramona; Mühlberger, Andreas; North, Max; Pauli, Paul; P…	2019	Journal of Anxiety Disorders	https://doi.org/10.1016/j.janxdis.2018.06.005
Clinical Psychology: Neuroses & Anxiety Disorders	Social networks use disorder and associations with depression and anxiety symptoms: A systematic review of recent research in China	Hussain, Zaheer; Wegmann, Elisa; Yang, Haibo; Montag, Christian	2020	Frontiers in Psychology, 2020	https://doi.org/10.3389/fpsyg.2020.00211
Clinical Psychology: Neuroses & Anxiety Disorders	Navigating the garden of forking paths for data exclusions in fear conditioning research	Lonsdorf, Tina B.; Klingelhöfer-Jens, Maren; Andreatta, Marta; Beckers, Tom; Chalkia, Anastasia; Gerlicher, Anna; Jentsch, Valerie L.; Drexler, Shira Meir; Mertens, Gaetan; Richter, Jan; Sjouwerman, Rachel; Wendt, Julia; Merz, Christian J.	2019	eLife, 2019	https://doi.org/10.7554/eLife.52465
Clinical Psychology: Neuroses & Anxiety Disorders	Cultures under stress: A cross-national meta-analysis of cortisol responses to the Trier Social Stress Test and their association with anxiety-related value orientations and internalizing mental disorders	Miller, Robert; Kirschbaum, Clemens	2019	Psychoneuroendocrinology	https://doi.org/10.1016/j.psyneuen.2018.12.236
Clinical Psychology: Neuroses & Anxiety Disorders	Effects of mindfulness exercises as stand-alone intervention on symptoms of anxiety and depression: Systematic review and meta-analysis	Blanck, Paul; Perleth, Sarah; Heidenreich, Thomas; Kröger, Paula; Ditzen, Beate; Bents, Hinrich; Mander, Johannes	2018	Behaviour Research and Therapy	https://doi.org/10.1016/j.brat.2017.12.002
Clinical Psychology: Neuroses & Anxiety Disorders	Meta-analysis of anxiety in parents of young people with chronic health conditions	Pinquart, Martin	2019	Journal of Pediatric Psychology	https://doi.org/10.1093/jpepsy/jsz024
Clinical Psychology: Neuroses & Anxiety Disorders	Effects of exercise on depression and anxiety in persons living with HIV: A meta-analysis	Heissel, Andreas; Zech, Philipp; Rapp, Michael A.; Schuch, Felipe B.; Lawrence, Jimmy B.; Kangas, Maria; Heinzel, Stephan	2019	Journal of Psychosomatic Research, 2019	https://doi.org/10.1016/j.jpsychores.2019.109823
Clinical Psychology: Neuroses & Anxiety Disorders	The effects of meditation, yoga, and mindfulness on depression, anxiety, and stress in tertiary education students: A meta-analysis	Breedvelt, Josefien J. F.; Amanvermez, Yagmur; Harrer, Mathias; Karyotaki, Eirini; Gilbody, Simon; Bockting, Claudi L. H.; Cuijpers, Pim; Ebert, David D.	2019	Frontiers in Psychiatry, 2019	https://doi.org/10.3389/fpsyt.2019.00193
Clinical Psychology: Personality Disorders	A meta-analysis of psychodynamic treatments for borderline and cluster C personality disorders	Keefe, John R.; McMain, Shelley F.; McCarthy, Kevin S.; Zilcha-Mano, Sigal; Dinger, Ulrike; Sahin, Zeynep; Graham, Kathryn; Barber, Jacques P.	2020	Personality Disorders: Theory, Research, and Treatment	https://doi.org/10.1037/per0000382
Clinical Psychology: Personality Disorders	Hypothalamic-pituitary-adrenal axis functioning in borderline personality disorder: A meta-analysis	Drews, Elisa; Fertuck, Eric A.; Koenig, Julian; Kaess, Michael; Arntz, Arnoud	2019	Neuroscience and Biobehavioral Reviews	https://doi.org/10.1016/j.neubiorev.2018.11.008
Clinical Psychology: Personality Disorders	Spricht ein unauff<U+FFFD>lliger Haftverlauf gegen das Vorliegen einer dissozialen Pers<U+FFFD>nlichkeitsst<U+FFFD>rung?. Eine systematische <U+FFFD>bersicht <U+FFFD>ber Forschungsbefunde zu Zusammenh<U+FFFD>ngen	Heering, Nina	2020	RPsych - Rechtspsychologie	https://doi.org/10.5771/2365-1083-2020-2-259
Clinical Psychology: Personality Disorders	Neural correlates of affective disturbances: A comparative meta-analysis of negative affect processing in borderline personality disorder, major depressive disorder, and posttraumatic stress disorder	Schulze, Lars; Schulze, Andreas; Renneberg, Babette; Schmahl, Christian; Niedtfeld, Inga	2019	Biological Psychiatry: Cognitive Neuroscience and Neuroimaging	https://doi.org/10.1016/j.bpsc.2018.11.004
Clinical Psychology: Personality Disorders	Prevalence of personality disorders in the general adult population in Western countries: Systematic review and meta-analysis	Volkert, Jana; Gablonski, Thorsten-Christian; Rabung, Sven	2018	British Journal of Psychiatry	https://doi.org/10.1192/bjp.2018.202
Clinical Psychology: Personality Disorders	Group psychotherapy for borderline personality disorder: A meta-analysis of randomized-controlled trials	McLaughlin, Stephanie P. B.; Barkowski, Sarah; Burlingame, Gary M.; Strauss, Bernard; Rosendahl, Jenny	2019	Psychotherapy: Theory, Research, Practice, Training	https://doi.org/10.1037/pst0000211
Clinical Psychology: Personality Disorders	Linguistic markers of grandiose narcissism: A LIWC analysis of 15 samples	Holtzman, Nicholas S.; Tackman, Allison M.; Carey, Angela L.; Brucks, Melanie S.; K<U+FFFD>fner, Albrecht C. P.; Deters, Fenne Gro<U+FFFD>e; Back, Mitja D.; Donnellan, M. Brent; Pennebaker, James W.; Sherman, Ryne A.; Mehl, Matthias R.	2019	Journal of Language and Social Psychology	https://doi.org/10.1177/0261927X19871084
Clinical Psychology: Psychodynamics	A meta-analysis of psychodynamic treatments for borderline and cluster C personality disorders	Keefe, John R.; McMain, Shelley F.; McCarthy, Kevin S.; Zilcha-Mano, Sigal; Dinger, Ulrike; Sahin, Zeynep; Graham, Kathryn; Barber, Jacques P.	2020	Personality Disorders: Theory, Research, and Treatment	https://doi.org/10.1037/per0000382
Clinical Psychology: Psychodynamics	A series of meta-analytic tests of the efficacy of long-term psychoanalytic psychotherapy	Woll, Christian Franz Josef; Sch<U+FFFD>nbrodt, Felix D.	2020	European Psychologist	https://doi.org/10.1027/1016-9040/a000385
Clinical Psychology: Stress & Burnout	Stress management interventions for college students: A systematic review and meta-analysis	Amanvermez, Yagmur; Rahmadiana, Metta; Karyotaki, Eirini; de Wit, Leonore; Ebert, David D.; Kessler, Ronald C.; Cuijpers, Pim	2020	Clinical Psychology - Science and Practice	https://doi.org/10.1111/cpsp.12342
Clinical Psychology: Stress & Burnout	Psychological interventions to foster resilience in healthcare students	Kunzler, Angela M.; Helmreich, Isabella; König, Jochem; Chmitorz, Andrea; Wessa, Michèle; Binder, Harald; Lieb, Klaus	2020	Cochrane Database of Systematic Reviews, 2020	https://doi.org/10.1002/14651858.CD013684
Clinical Psychology: Stress & Burnout	Depression and burnout in (junior) elite athletes: Reviewing the state of knowledge and analysing their relationship	Nixdorf, Raphael	2018		http://nbn-resolving.de/urn:nbn:de:bvb:91-diss-20180606-1375844-1-2
Clinical Psychology: Stress & Burnout	A meta-analysis of the effects of teacher personality on teacher effectiveness and burnout	Kim, Lisa E.; Jörg, Verena; Klassen, Robert M.	2019	Educational Psychology Review	https://doi.org/10.1007/s10648-018-9458-2
Clinical Psychology: Stress & Burnout	Culture, burnout, and engagement: A meta-analysis on national cultural values as moderators in JD-R theory	Rattrie, Lucy T.B.; Kittler, Markus G.; Paul, Karsten I.	2019	Applied Psychology: An International Review	https://doi.org/10.1111/apps.12209
Clinical Psychology: Stress & Burnout	Professional burnout among medical students: Systematic literature review and meta-analysis	Erschens, Rebecca; Keifenheim, Katharina Eva; Herrmann-Werner, Anne; Loda, Teresa; Schwille-Kiuntke, Juliane; Bugaj, Till Johannes; Nikendei, Christoph; Huhn, Daniel; Zipfel, Stephan; Junne, Florian	2019	Medical Teacher	https://doi.org/10.1080/0142159X.2018.1457213
Clinical Psychology: Stress & Burnout	Collaborative meta-analysis finds no evidence of a strong interaction between stress and 5-HTTLPR genotype contributing to the development of depression	Culverhouse, R. C.; Saccone, N. L.; Horton, A. C.; Ma, Y.; Anstey, K. J.Bierut, L. J.; Banaschewski, T.; Burmeister, M.; Cohen-Woods, S.; Etain, B.Laucht, M.; Fisher, H. L.; Goldman, N.; Guillaume, S.; Horwood, J.; Juhasz, G; Lester, K. J.; Mandelli, L.; Middeldorp, C. M.; Olie, E.; Villafuerte, S.; Air, T. M.; Araya, R.Ritchie, K.; Bowes, L.; Burns, R.Fergusson, D. M.; Byrne, E. M.; Coffey, C.; …	2018	Molecular Psychiatry	https://doi.org/10.1038/mp.2017.44
Clinical Psychology: Stress & Burnout	The effects of meditation, yoga, and mindfulness on depression, anxiety, and stress in tertiary education students: A meta-analysis	Breedvelt, Josefien J. F.; Amanvermez, Yagmur; Harrer, Mathias; Karyotaki, Eirini; Gilbody, Simon; Bockting, Claudi L. H.; Cuijpers, Pim; Ebert, David D.	2019	Frontiers in Psychiatry, 2019	https://doi.org/10.3389/fpsyt.2019.00193
Clinical Psychology: Stress & Burnout	Cultures under stress: A cross-national meta-analysis of cortisol responses to the Trier Social Stress Test and their association with anxiety-related value orientations and internalizing mental disorders	Miller, Robert; Kirschbaum, Clemens	2019	Psychoneuroendocrinology	https://doi.org/10.1016/j.psyneuen.2018.12.236
Clinical Psychology: Stress & Burnout	Parenting stress in caregivers of children with chronic physical condition - A meta-analysis	Pinquart, Martin	2018	Stress and Health	https://doi.org/10.1002/smi.2780
Clinical Psychology: Stress & Burnout	Stressful life events and maltreatment in conversion (functional neurological) disorder: Systematic review and meta-analysis of case-control studies	Ludwig, Lea; Pasman, Joëlle A.; Nicholson, Timothy; Aybek, Selma; David, Anthony S.; Tuck, Sharon; Kanaan, Richard A.; Roelofs, Karin; Carson, Alan; Stone, Jon	2018	The Lancet Psychiatry	https://doi.org/10.1016/S2215-0366(18)30051-8
Clinical Psychology: Stress & Burnout	Mindfulness-based interventions in the workplace: An inclusive systematic review and meta-analysis of their impact upon wellbeing	Lomas, Tim; Medina, Juan Carlos; Ivtzan, Itai; Rupprecht, Silke; Eiroa-Orosa, Francisco José	2019	Journal of Positive Psychology	https://doi.org/10.1080/17439760.2018.1519588
Clinical Psychology: Stress & Burnout	Mindfulness-based programs in the workplace: A meta-analysis of randomized controlled trials	Vonderlin, Ruben; Biermann, Miriam; Bohus, Martin; Lyssenko, Lisa	2020	Mindfulness	https://doi.org/10.1007/s12671-020-01328-3
Clinical Psychology: Stress & Burnout	The contributions of knowledge and stress to academic achievement. A meta-analysis, a latent transition analysis, and a latent state-trait model	Flaig, Maja	2019		http://nbn-resolving.de/urn:nbn:de:hbz:385-1-10848
Clinical Psychology: Stress & Burnout	A meta-analysis on promotion- and prevention-focused job crafting	Lichtenthaler, Philipp W.; Fischbach, Andrea	2019	European Journal of Work and Organizational Psychology	https://doi.org/10.1080/1359432X.2018.1527767
Clinical Psychology: Stress & Burnout	The Instrument for Stress-Oriented Task Analysis (ISTA). A meta-analysis	Irmer, Julien Patrick; Kern, Marcel; Schermelleh-Engel, Karin; Semmer, Norbert K.; Zapf, Dieter	2019	Zeitschrift für Arbeits- und Organisationspsychologie	https://doi.org/10.1026/0932-4089/a000312
Clinical Psychology: Trauma	Does childhood trauma moderate polygenic risk for depression? A meta-analysis of 5765 subjects from the Psychiatric Genomics Consortium	Peyrot, Wouter J.; Van der Auwera, Sandra; Milaneschi, Yuri; Dolan, Conor V.; Madden, Pamela A. F.; Sullivan, Patrick F.; Strohmaier, Jana; Ripke, Stephan; Rietschel, Marcella; Nivard, Michel G.; Mullins, Niamh; Montgomery, Grant W.; Henders, Anjali K.; Heat, Andrew C.; Fisher, Helen L.; Dunn, Erin C.; Byrne, Enda M.; Air, Tracy A.; Baune, Bernhard T.; Breen, Gerome; Levinson, Douglas F.; Lewis, …	2018	Biological Psychiatry	https://doi.org/10.1016/j.biopsych.2017.09.009
Clinical Psychology: Trauma	Dissociation in victims of childhood abuse or neglect: A meta-analytic review	Vonderlin, Ruben; Kleindienst, Nikolaus; Alpers, Georg W.; Bohus, Martin; Lyssenko, Lisa; Schmahl, Christian	2018	Psychological Medicine	https://doi.org/10.1017/S0033291718000740
Clinical Psychology: Trauma	Wie beeinflussen Misshandlungserfahrungen im Kindesalter das Erleben von chronischen Schmerzen im Erwachsenenalter? - Eine Metaanalyse	Savluk, Lidia; Petermann, Franz; Vasileva, Mira	2019	Zeitschrift f<U+FFFD>r Psychiatrie, Psychologie und Psychotherapie	https://doi.org/10.1024/1661-4747/a000376
Clinical Psychology: Trauma	A systematic review of dissociation in female sex workers	Tschoeke, Stefan; Borbe, Raoul; Steinert, Tilman; Bichescu-Burian, Dana	2019	Journal of Trauma & Dissociation	https://doi.org/10.1080/15299732.2019.1572044
Clinical Psychology: Trauma	Is there a female cycle of violence after exposure to childhood maltreatment? A meta-analysis	Augsburger, Mareike; Basler, Kayley; Maercker, Andreas	2019	Psychological Medicine	https://doi.org/10.1017/S0033291719000680
Clinical Psychology: Trauma	Childhood maltreatment and treatment outcome in psychotic disorders: A systematic review and meta-analysis	Thomas, S.; H<U+FFFD>fler, M.; Sch<U+FFFD>fer, I.; Trautmann, S.	2019	Acta Psychiatrica Scandinavica	https://doi.org/10.1111/acps.13077
Clinical Psychology: Trauma	The resilient emotional brain: A scoping review of the medial prefrontal cortex and limbic structure and function in resilient adults with a history of childhood maltreatment	Moreno-L<U+FFFD>pez, Laura; Ioannidis, Konstantinos; Askelund, Adrian Dahl; Smith, Alicia J.; Schueler, Katja; Van Harmelen, Anne-Laura	2020	Biological Psychiatry: Cognitive Neuroscience and Neuroimaging	https://doi.org/10.1016/j.bpsc.2019.12.008
Clinical Psychology: Trauma	Attachment, development, and mental health in abused and neglected preschool children in foster care: A meta-analysis	Vasileva, Mira; Petermann, Franz	2018	Trauma, Violence, & Abuse	https://doi.org/10.1177/1524838016669503
Clinical Psychology: Trauma	Trauma exposure, posttraumatic stress disorder and oxytocin: A meta-analytic investigation of endogenous concentrations and receptor genotype	Engel, Sinha; Klusmann, Hannah; Laufer, Sebastian; Pfeifer, Ann-Christin; Ditzen, Beate; van Zuiden, Mirjam; Knaevelsrud, Christine; Schumacher, Sarah	2019	Neuroscience and Biobehavioral Reviews	https://doi.org/10.1016/j.neubiorev.2019.08.003
Clinical Psychology: Trauma	The prevalence of PTSD and major depression in the global population of adult war survivors: A meta-analytically informed estimate in absolute numbers	Hoppen, Thole Hilko; Morina, Nexhmedin	2019	European Journal of Psychotraumatology, 2019	https://doi.org/10.1080/20008198.2019.1578637
Clinical Psychology: Trauma	The link between masculinity ideologies and posttraumatic stress: A systematic review and meta-analysis	Kaiser, Julia; Hanschmidt, Franz; Kersting, Anette	2020	Psychological Trauma: Theory, Research, Practice, and Policy	https://doi.org/10.1037/tra0000578
Clinical Psychology: Trauma	Risk factors and clinical manifestations of prolonged grief disorder: Particular characteristics of violent loss	Heeke, Carina	2018		https://doi.org/10.17169/refubium-359
Clinical Psychology: Trauma	Virtual reality exposure therapy for posttraumatic stress disorder (PTSD): A meta-analysis	Kothgassner, Oswald D.; Goreis, Andreas; Kafka, Johanna X.; Van Eickels, Rahel L.; Plener, Paul L.; Felnhofer, Anna	2019	European Journal of Psychotraumatology, 2019	https://doi.org/10.1080/20008198.2019.1654782
Clinical Psychology: Trauma	Do adjuvant interventions improve treatment outcome in adult patients with posttraumatic stress disorder receiving trauma-focused psychotherapy? A systematic review	Michael, Tanja; Schanz, Christian G.; Mattheus, Hannah K.; Issler, Tobias; Frommberger, Ulrich; K<U+FFFD>llner, Volker; Equit, Monika	2019	European Journal of Psychotraumatology, 2019	https://doi.org/10.1080/20008198.2019.1634938
Clinical Psychology: Trauma	Development of an international data repository and research resource: The prospective studies of acute child trauma and recovery (PACT/R) data archive	Kassam-Adams, Nancy; Kenardy, Justin A.; Delahanty, Douglas L.; Marsac, Meghan L.; Meiser-Stedman, Richard; Nixon, Reginald D. V.; Landolt, Markus A.; Palmieri, Patrick A.	2020	European Journal of Psychotraumatology, 2020	https://doi.org/10.1080/20008198.2020.1729025
Clinical Psychology: Trauma	Neuroendocrine mechanisms of grief and bereavement: A systematic review and implications for future interventions	Hopf, Dora; Eckstein, Monika; Aguilar-Raab, Corina; Warth, Marco; Ditzen, Beate	2020	Journal of Neuroendocrinology, 2020	https://doi.org/10.1111/jne.12887
Clinical Psychology: Trauma	From fragments to identity: Reminiscence, life review and well-being of holocaust survivors. An integrative review	Zimmermann, Sarah; Forstmeier, Simon	2020	Aging & Mental Health	https://doi.org/10.1080/13607863.2018.1525608
Clinical Psychology: Trauma	Sleep disorders in migrants and refugees: A systematic review with implications for personalized medical approach	Richter, Kneginja; Baumg<U+FFFD>rtner, Lisa; Niklewski, G<U+FFFD>nter; Peter, Lukas; K<U+FFFD>ck, Melanie; Kellner, Stefanie; Hillemacher, Thomas; B<U+FFFD>ttner-Teleaga, Antje	2020	EPMA Journal	https://doi.org/10.1007/s13167-020-00205-2
Clinical Psychology: Trauma	Associations between trauma exposure, posttraumatic stress disorder, and aggression perpetrated by women. A meta-analysis	Augsburger, Mareike; Maercker, Andreas	2020	Clinical Psychology - Science and Practice, 2020	https://doi.org/10.1111/cpsp.12322
Clinical Psychology: Trauma	The relationship between sense of coherence and post-traumatic stress: A meta-analysis	Sch<U+FFFD>fer, S. K.; Becker, N.; King, L.; Horsch, A.; Michael, T.	2019	European Journal of Psychotraumatology, 2019	https://doi.org/10.1080/20008198.2018.1562839
Clinical Psychology: Trauma	Association of trauma, posttraumatic stress disorder and conduct disorder: A systematic review and meta-analysis	Bernhard, Anka; Martinelli, Anne; Ackermann, Katharina; Saure, Daniel; Freitag, Christine M.	2018	Neuroscience and Biobehavioral Reviews	https://doi.org/10.1016/j.neubiorev.2016.12.019
Clinical Psychology: Trauma	Stressful life events and maltreatment in conversion (functional neurological) disorder: Systematic review and meta-analysis of case-control studies	Ludwig, Lea; Pasman, Jo<U+FFFD>lle A.; Nicholson, Timothy; Aybek, Selma; David, Anthony S.; Tuck, Sharon; Kanaan, Richard A.; Roelofs, Karin; Carson, Alan; Stone, Jon	2018	The Lancet Psychiatry	https://doi.org/10.1016/S2215-0366(18)30051-8
Clinical Psychology: Trauma	Focused psychosocial interventions for children in low-resource humanitarian settings: A systematic review and individual participant data meta-analysis	Purgato, Marianna; Gross, Alden L.; Betancourt, Theresa; Bolton, Paul; Bonetto, Chiara; Gastaldon, Chiara; Gordon, James; O'Callaghan, Paul; Papola, Davide; Peltonen, Kirsi; Punamaki, Raija-Leena; Richards, Justin; Staples, Julie K.; Unterhitzenberger, Johanna; van Ommeren, Mark; de Jong, Joop; Jordans, Mark J. D.; Tol, Wietse A.; Barbui, Corrado	2018	The Lancet Global Health, 2018	https://doi.org/10.1111/add.14085
Clinical Psychology: Trauma	Structural white matter changes in adults and children with posttraumatic stress disorder: A systematic review and meta-analysis	Siehl, Sebastian; King, John A.; Burgess, Neil; Flor, Herta; Nees, Frauke	2018	NeuroImage: Clinical	https://doi.org/10.1016/j.nicl.2018.05.013
Clinical Psychology: Trauma	Prevalence of depression and posttraumatic stress disorder in adult civilian survivors of war who stay in war-afflicted regions. A systematic review and meta-analysis of epidemiological studies	Morina, Nexhmedin; Stam, Kimberly; Pollet, Thomas V.; Priebe, Stefan	2018	Journal of Affective Disorders	https://doi.org/10.1016/j.jad.2018.07.027
Clinical Psychology: Trauma	Adjuvante Verfahren zur Unterst<U+FFFD>tzung von traumafokussierter Psychotherapie bei Erwachsenen mit Posttraumatischer Belastungsst<U+FFFD>rung. Welche Evidenz gibt es?	Michael, Tanja; Schanz, Christian G.; Mattheus, Hannah K.; Issler, Tobias T.; Frommberger, Ulrich; K<U+FFFD>llner, Volker; Equit, Monika	2020	Trauma & Gewalt	https://doi.org/10.21706/tg-14-2-112
Clinical Psychology: Trauma	A systematic review of interleukin-1 in post-traumatic stress disorder: Evidence from human and animal studies	Waheed, Aysha; Dalton, Bethan; Wesemann, Ulrich; Ibrahim, Mohammad A. A.; Himmerich, Hubertus	2018	Journal of Interferon and Cytokine Research	https://doi.org/10.1089/jir.2017.0088
Clinical Psychology: Trauma	Zusammenhang zwischen beruflichen Traumata, posttraumatischer Belastungsst<U+FFFD>rung und Depression - eine Beurteilung von systematischen Reviews	Bolm-Audorff, Ulrich; Petereit-Haack, Gabriela; Seidler, Andreas	2019	Psychiatrische Praxis	https://doi.org/10.1055/a-0822-7712
Clinical Psychology: Trauma	Efficacy of self-management smartphone-based apps for post-traumatic stress disorder symptoms: A systematic review and meta-Analysis	Goreis, Andreas; Felnhofer, Anna; Kafka, Johanna Xenia; Probst, Thomas; Kothgassner, Oswald D.	2020	Frontiers in Neuroscience, 2020	https://doi.org/10.3389/fnins.2020.00003
Communication and Media Psychology	Shyness and social media use: A meta-analytic summary of moderating and mediating effects	Appel, Markus; Gnambs, Timo	2019	Computers in Human Behavior	https://doi.org/10.1016/j.chb.2019.04.018
Communication and Media Psychology	Social networks use disorder and associations with depression and anxiety symptoms: A systematic review of recent research in China	Hussain, Zaheer; Wegmann, Elisa; Yang, Haibo; Montag, Christian	2020	Frontiers in Psychology, 2020	https://doi.org/10.3389/fpsyg.2020.00211
Communication and Media Psychology	Narcissism and social networking behavior: A meta-analysis	Gnambs, Timo; Appel, Markus	2018	Journal of Personality	https://doi.org/10.1111/jopy.12305
Communication and Media Psychology	Active on Facebook and failing at school? Meta-analytic findings on the relationship between online social networking activities and academic achievement	Marker, Caroline; Gnambs, Timo; Appel, Markus	2018	Educational Psychology Review	https://doi.org/10.1007/s10648-017-9430-6
Communication and Media Psychology	Association between suicide reporting in the media and suicide: Systematic review and meta-analysis	Niederkrotenthaler, Thomas; Braun, Marlies; Pirkis, Jane; Till, Benedikt; Stack, Steven; Sinyor, Mark; Tran, Ulrich S.; Voracek, Martin; Cheng, Qijin; Arendt, Florian; Scherr, Sebastian; Yip, Paul S. F.; Spittal, Matthew J.	2020	BMJ (British Medical Journal), 2020	https://doi.org/10.1136/bmj.m575
Communication and Media Psychology	Wem n<U+FFFD>tzt die App? Internet- und mobilgest<U+FFFD>tzte Interventionen (IMIs) im Spannungsfeld von Autonomie und Patientenwohl	Rubeis, Giovanni; Ketteler, Daniel	2020	PPmP - Psychotherapie, Psychosomatik, Medizinische Psychologie	https://doi.org/10.1055/a-1104-5459
Communication and Media Psychology	Einflussreich, aber wenig beachtet? Eine Meta-Studie zum Stand der deutschsprachigen Forschung <U+FFFD>ber strategische Kommunikation von Wissenschaftsorganisationen	F<U+FFFD>hnrich, Birte	2018	Publizistik	https://doi.org/10.1007/s11616-018-0435-z
Communication and Media Psychology	Smartphone apps in the context of tinnitus: Systematic review	Mehdi, Muntazir; Riha, Constanze; Neff, Patrick; Dode, Albi; Pryss, R<U+FFFD>diger; Schlee, Winfried; Reichert, Manfred; Hauck, Franz J.	2020	Sensors, 2020	https://doi.org/10.3390/s20061725
Communication and Media Psychology	Revisiting culture. A review of a neglected dimension in media psychology	Oda^D&; g, <U+FFFD>zen; Hanke, Katja	2019	Journal of Media Psychology	https://doi.org/10.1027/1864-1105/a000244
Communication and Media Psychology	Digit ratio (2D:4D) in relation to substance and computer use: A meta-analysis	Siegmann, Eva-Maria; Bouna-Pyrrou, Polyxeni; Lenz, Bernd; Kornhuber, Johannes	2019	Journal of Neural Transmission	https://doi.org/10.1007/s00702-019-02002-2
Communication and Media Psychology	Sexualizing media use and self-objectification: A meta-analysis	Karsay, Kathrin; Knoll, Johannes; Matthes, Joerg	2018	Psychology of Women Quarterly	https://doi.org/10.1177/0361684317743019
Communication and Media Psychology	Virtual reality check: Statistical power, reported results, and the validity of research on the psychology of virtual reality and immersive environments	Lanier, Madison; Waddell, Franklin; Elson, Malte; Tamul, Daniel J.; Ivory, James D.; Przybylski, Andrew	2019	Computers in Human Behavior	https://doi.org/10.1016/j.chb.2019.06.015
Developmental Psychology	The relation between attachment and depression in children and adolescents: A multilevel meta-analysis	Spruit, Anouk; Goos, Linda; Weenink, Nikki; Rodenburg, Roos; Niemeyer, Helen; Stams, Geert Jan; Colonnesi, Cristina	2020	Clinical Child and Family Psychology Review	https://doi.org/10.1007/s10567-019-00299-9
Developmental Psychology	Changing behaviour in pregnant women: A scoping review	Zinsser, Laura A.; Stoll, Kathrin; Wieber, Frank; Pehlke-Milde, Jessica; Gross, Mechthild M.	2020	Midwifery, 2020	https://doi.org/10.1016/j.midw.2020.102680
Developmental Psychology	Die Folgen institutioneller Krippenbetreuung auf die kindliche Entwicklung - Ein systematisches Review	Holl, Julia; Vidalón Blachowiak, Thorsten; Wiehmann, Janna; Taubner, Svenja	2020	Forum der Psychoanalyse	https://doi.org/10.1007/s00451-020-00416-3
Developmental Psychology	The association between breastfeeding and attachment: A systematic review	Linde, Katja; Lehnig, Franziska; Nagl, Michaela; Kersting, Anette	2020	Midwifery, 2020	https://doi.org/10.1016/j.midw.2019.102592
Developmental Psychology	Attachment, development, and mental health in abused and neglected preschool children in foster care: A meta-analysis	Vasileva, Mira; Petermann, Franz	2018	Trauma, Violence, & Abuse	https://doi.org/10.1177/1524838016669503
Developmental Psychology	Examining ecological constraints on the intergenerational transmission of attachment via individual participant data meta-analysis	Verhage, Marije L.; Fearon, R.M. Pasco; Schuengel, Carlo; van IJzendoorn, Marinus H.; Bakermans-Kranenburg, Marian J.; Madigan, Sheri; Roisman, Glenn I.; Oosterman, Mirjam; Behrens, Kazuko Y.; Wong, Maria S.; Mangelsdorf, Sarah; Priddis, Lynn E.; Brisch, Karl-Heinz	2018	Child Development	https://doi.org/10.1111/cdev.13085
Developmental Psychology	Parental expectations. Intercultural perspectives and parents of children with a mental disorder	Ebeling, Markus	2020		https://doi.org/10.17192/z2020.0248
Developmental Psychology	Parenting stress in caregivers of children with chronic physical condition - A meta-analysis	Pinquart, Martin	2018	Stress and Health	https://doi.org/10.1002/smi.2780
Developmental Psychology	Meta-analysis of anxiety in parents of young people with chronic health conditions	Pinquart, Martin	2019	Journal of Pediatric Psychology	https://doi.org/10.1093/jpepsy/jsz024
Developmental Psychology	Women's psychological experiences of physiological childbirth: A meta-synthesis	Olza, Ibone; Leahy-Warren, Patricia; Benyamini, Yael; Kazmierczak, Maria; Karlsdottir, Sigfridur Inga; Spyridou, Andria; Crespo-Mirasol, Esther; Takács, Lea; Hall, Priscilla J.; Murphy, Margaret; Jonsdottir, Sigridur Sia; Downe, Soo; Nieuwenhuijze, Marianne J.	2018	BMJ Open, 2018	https://doi.org/10.1136/bmjopen-2017-020347
Developmental Psychology	Social determinants of obesity: How parents shape the eating behavior and body weight of their children	Dallacker, Mattea	2018		http://nbn-resolving.de/urn:nbn:de:kobv:188-fudissthesis000000106227-0
Developmental Psychology	Treatment of child externalizing behavior problems: A comprehensive review and meta-meta-analysis on effects of parent-based interventions on parental characteristics	Weber, Linda; Kamp-Becker, Inge; Christiansen, Hanna; Mingebach, Tanja	2019	European Child & Adolescent Psychiatry	https://doi.org/10.1007/s00787-018-1175-3
Developmental Psychology	Parental educational expectations and academic achievement in children and adolescents - A meta-analysis	Pinquart, Martin; Ebeling, Markus	2020	Educational Psychology Review	https://doi.org/10.1007/s10648-019-09506-z
Developmental Psychology	Do the associations of parenting styles with behavior problems and academic achievement vary by culture? Results from a meta-analysis	Pinquart, Martin; Kauser, Rubina	2018	Cultural Diversity & Ethnic Minority Psychology	https://doi.org/10.1037/cdp0000149
Developmental Psychology	Systematic review showed that low and moderate prenatal alcohol and nicotine exposure affected early child development	Römer, Pia; Mathes, Birgit; Reinelt, Tilman; Stoyanova, Polina; Petermann, Franz; Zierul, Claudia	2020	Acta Paediatrica	https://doi.org/10.1111/apa.15453
Developmental Psychology	Systematic review on the impact of intelligence on cognitive decline and dementia risk	Rodriguez, Francisca S.; Lachmann, Thomas	2020	Frontiers in Psychology, 2020	https://doi.org/10.3389/fpsyt.2020.00658
Developmental Psychology	Psychological resilience during the perimenopause	Süss, Hannah; Ehlert, Ulrike	2020	Maturitas	https://doi.org/10.1016/j.maturitas.2019.10.015
Developmental Psychology	Brain structure and cognitive ability in healthy aging: A review on longitudinal correlated change	Oschwald, Jessica; Guye, Sabrina; Liem, Franziskus; Rast, Philippe; Willis, Sherry; Röcke, Christina; Jäncke, Lutz; Martin, Mike; Mérillat, Susan	2020	Reviews in the Neurosciences	https://doi.org/10.1515/revneuro-2018-0096
Developmental Psychology	Förderung der Emotionsregulation von der frühen Kindheit bis zum Jugendalter	Petersen, Rieke	2020		https://doi.org/10.26092/elib/35
Developmental Psychology	The assessment of views on ageing: A review of self-report measures and innovative extensions	Klusmann, Verena; Notthoff, Nanna; Beyer, Ann-Kristin; Blawert, Anne; Gabrian, Martina	2020	European Journal of Ageing	https://doi.org/10.1007/s10433-020-00556-9
Developmental Psychology	From fragments to identity: Reminiscence, life review and well-being of holocaust survivors. An integrative review	Zimmermann, Sarah; Forstmeier, Simon	2020	Aging & Mental Health	https://doi.org/10.1080/13607863.2018.1525608
Developmental Psychology	Cognitive plasticity in healthy older adults: Effects of nonpharmacological interventions and predictors of intervention success	Roheger, Mandy	2019		http://nbn-resolving.de/urn:nbn:de:hbz:38-105126
Developmental Psychology	Similarities and differences across countries in the development of executive functions in children: A systematic review	Schirmbeck, Katharina; Rao, Nirmala; Maehler, Claudia	2020	Infant and Child Development, 2020	https://doi.org/10.1002/icd.2164
Developmental Psychology	Public-Health-Monitoring für die Altersgruppe 65+ in Deutschland - Auswahl und Definition von Indikatoren	Grube, Maike M.; Scheidt-Nave, Christa; Gaertner, Beate; Lüdtke, Denise; Bosnjak, Michael; Heinrich, Stephanie; Lahmann, Nils; Meyer, Gabriele; Rapp, Kilian; Riedel-Heller, Steffi; Schäufele, Martina; Wolf-Ostermann, Karin; Zank, Susanne; Fuchs, Judith	2019	Journal of Health Monitoring	https://doi.org/10.25646/5984
Developmental Psychology	Health-related preferences of older patients with multimorbidity: The protocol for an evidence map	Isabel González-González, Ana; Schmucker, Christine; Blom, Jeanet; van den Akker, Marjan; Nguyen, Truc Sophia; Nothacker, Julia; Meerpohl, Joerg J.; Röttger, Kristian; Wegwarth, Odette; Hoffmann, Tammy; Straus, Sharon E.; Gerlach, Ferdinand M.; Muth, Christiane	2019	BMJ Open, 2019	https://doi.org/10.1136/bmjopen-2019-029724
Developmental Psychology	Social competence and psychopathology in early childhood: A systematic review	Huber, Laura; Plötner, Maria; Schmitz, Julian	2019	European Child & Adolescent Psychiatry	https://doi.org/10.1007/s00787-018-1152-x
Developmental Psychology	The concept of self-regulation and preschoolers` social-emotional development: A systematic review	Rademacher, Annika; Koglin, Ute	2019	Early Child Development and Care	https://doi.org/10.1080/03004430.2018.1450251
Developmental Psychology	Putting a finger on numerical development - Reviewing the contributions of Kindergarten finger gnosis and fine motor skills to numerical abilities	Barrocas, Roberta; Roesch, Stephanie; Gawrilow, Caterina; Moeller, Korbinian	2020	Frontiers in Psychology, 2020	https://doi.org/10.3389/fpsyg.2020.01012
Developmental Psychology	Individual consequences of age stereotypes on older workers. A systematic review	Weber, Jeannette; Angerer, Peter; Müller, Andreas	2019	Zeitschrift für Gerontologie und Geriatrie, 2019	https://doi.org/10.1007/s00391-019-01506-6
Developmental Psychology	Age differences in hindsight bias: A meta-analysis	Groß, Julia; Pachur, Thorsten	2019	Psychology and Aging	https://doi.org/10.1037/pag0000329
Developmental Psychology	Coupled cognitive changes in adulthood: A meta-analysis	Tucker-Drob, Elliot M.; Brandmaier, Andreas M.; Lindenberger, Ulman	2019	Psychological Bulletin	https://doi.org/10.1037/bul0000179
Developmental Psychology	Ready to be a silver surfer? A meta-analysis on the relationship between chronological age and technology acceptance	Hauk, Nathalie; Hüffmeier, Joachim; Krumm, Stefan	2018	Computers in Human Behavior	https://doi.org/10.1016/j.chb.2018.01.020
Developmental Psychology	Longitudinal associations of the attainment of developmental tasks with psychological symptoms in adolescence: A meta-analysis	Pinquart, Martin; Pfeiffer, Jens P.	2020	Journal of Research on Adolescence	https://doi.org/10.1111/jora.12462
Developmental Psychology	Trade-off of cerebello-cortical and cortico-cortical functional networks for planning in 6-year-old children	Kipping, Judy A.; Margulies, Daniel S.; Eickhoff, Simon B.; Lee, Annie; Qiu, Anqi	2018	NeuroImage	https://doi.org/10.1016/j.neuroimage.2018.04.067
Developmental Psychology	Kognitive Interventionen in Pflegeheimen. Systematische Übersicht der präventiven Wirksamkeit auf die kognitive Leistungsfähigkeit von Pflegebedürftigen	Wöhl, C.; Richter, S.; Blättner, B.	2018	Zeitschrift für Gerontologie und Geriatrie	https://doi.org/10.1007/s00391-017-1330-3
Developmental Psychology	Inhibition in aging: What is preserved? What declines? A meta-analysis	Rey-Mermet, Alodie; Gade, Miriam	2018	Psychonomic Bulletin & Review	https://doi.org/10.3758/s13423-017-1384-7
Developmental Psychology	Memory for faces in old age: A meta-analysis	Martschuk, Natalie; Sporer, Siegfried L.	2018	Psychology and Aging	https://doi.org/10.1037/pag0000282
Developmental Psychology	Development of self-esteem from age 4 to 94 years: A meta-analysis of longitudinal studies	Orth, Ulrich; Erol, Ruth Yasemin; Luciano, Eva C.	2018	Psychological Bulletin	https://doi.org/10.1037/bul0000161
Developmental Psychology	Aging in a digital world - Attitudes and behaviors towards technology use across the life-span	Hauk, Nathalie	2018		https://doi.org/10.17169/refubium-793
Developmental Psychology	Entwicklungspsychologische Grundlagen für die Entstehung von Vorurteilen	Beelmann, Andreas; Neudecker, Clara	2020
Developmental Psychology	Development of motivational variables and self-esteem during the school career: A meta-analysis of longitudinal studies	Scherrer, Vsevolod; Preckel, Franzis	2019	Review of Educational Research	https://doi.org/10.3102/0034654318819127
Developmental Psychology	The relationship between motor competence and physical fitness from early childhood to early adulthood: A meta-analysis	Utesch, Till; Bardid, Farid; Büsch, Dirk; Strauss, Bernd	2019	Sports Medicine	https://doi.org/10.1007/s40279-019-01068-y
Developmental Psychology	The effect of aging on response congruency in task switching: A meta-analysis	Grange, James A.; Becker, Raymond B.	2019	Journals of Gerontology Series B: Psychological Sciences and Social Sciences	https://doi.org/10.1093/geronb/gbx122
Developmental Psychology	Parental military deployment as risk factor for children's mental health: A meta-analytical review	Cunitz, Katrin; Dölitzsch, Claudia; Kösters, Markus; Willmund, Gerd-Dieter; Zimmermann, Peter; Bühler, Antje Heike; Fegert, Jörg M.; Ziegenhain, Ute; Kölch, Michael	2019	Child and Adolescent Psychiatry and Mental Health, 2019	https://doi.org/10.1186/s13034-019-0287-y
Developmental Psychology	A meta-analysis of fMRI studies of language comprehension in children	Enge, Alexander; Friederici, Angela D.; Skeide, Michael A.	2020	NeuroImage, 2020	https://doi.org/10.1016/j.neuroimage.2020.116858
Developmental Psychology	The reciprocal link between the Big Five traits and self-esteem: Longitudinal associations within and between parents and their offspring	Weidmann, Rebekka; Ledermann, Thomas; Robins, Richard W.; Gomez, Veronica; Grob, Alexander	2018	Journal of Research in Personality	https://doi.org/10.1016/j.jrp.2018.04.003
Educational Psychology	A review of learning demands in instructional animations: The educational effectiveness of animations unfolds if the features of change need to be learned	Ploetzner, Rolf; Berney, Sandra; B<U+FFFD>trancourt, Mireille	2020	Journal of Computer Assisted Learning	https://doi.org/10.1111/jcal.12476
Educational Psychology	Cognitive and social congruence in peer-assisted learning. A scoping review	Loda, Teresa; Erschens, Rebecca; Loenneker, Hannah; Keifenheim, Katharina E.; Nikendei, Christoph; Junne, Florian; Zipfel, Stephan; Herrmann-Werner, Anne	2019	PLoS ONE, 2019	https://doi.org/10.1371/journal.pone.0222224
Educational Psychology	Good for learning, bad for motivation? A meta-analysis on the effects of computer-supported collaboration scripts	Radkowitsch, Anika; Vogel, Freydis; Fischer, Frank	2020	International Journal of Computer-Supported Collaborative Learning	https://doi.org/10.1007/s11412-020-09316-4
Educational Psychology	A meta-analysis of relations between achievement and self-concept	M<U+FFFD>ller, Jens; Zitzmann, Steffen; Helm, Friederike; Machts, Nils; Wolff, Fabian	2020	Review of Educational Research	https://doi.org/10.3102/0034654320919354
Educational Psychology	To what extent do situation-model-approach interventions improve relative metacomprehension accuracy? Meta-analytic insights	Prinz, Anja; Golke, Stefanie; Wittwer, J<U+FFFD>rg	2020	Educational Psychology Review	https://doi.org/10.1007/s10648-020-09558-6
Educational Psychology	A meta-analysis of the segmenting effect	Rey, G<U+FFFD>nter Daniel; Beege, Maik; Nebel, Steve; Wirzberger, Maria; Schmitt, Tobias H.; Schneider, Sascha	2019	Educational Psychology Review	https://doi.org/10.1007/s10648-018-9456-4
Educational Psychology	F<U+FFFD>rderung der Emotionsregulation von der fr<U+FFFD>hen Kindheit bis zum Jugendalter	Petersen, Rieke	2020		https://doi.org/10.26092/elib/35
Educational Psychology	Mapping research in student engagement and educational technology in higher education: A systematic evidence map	Bond, Melissa; Buntins, Katja; Bedenlier, Svenja; Zawacki-Richter, Olaf; Kerres, Michael	2020	International Journal of Educational Technology in Higher Education	https://doi.org/10.1186/s41239-019-0176-8
Educational Psychology	Die Erfassung von Lehrer-Sch<U+FFFD>ler-Beziehungen: Ein <U+FFFD>berblick zu deutschsprachigen Messinstrumenten	Teistler, Nadja; Umlauft, S<U+FFFD>ren; Wolgast, Anett	2019	Empirische P<U+FFFD>dagogik	https://www.vep-landau.de/programm/empirische-paedagogik/
Educational Psychology	Emotion regulation in primary school children: A systematic review	Schlesier, Juliane; Roden, Ingo; Moschner, Barbara	2019	Children and Youth Services Review	https://doi.org/10.1016/j.childyouth.2019.02.044
Educational Psychology	Empirische Forschung in Lehr-Lern-Labor-Seminaren - Ein Systematic Review zu Wirkungen des Lehrformats	Rehfeldt, Daniel; Klempin, Christiane; Br<U+FFFD>mer, Martin; Seibert, David; Rogge, Irina; L<U+FFFD>cke, Martin; Sambanis, Michaela; Nordmeier, Volkhard; K<U+FFFD>ster, Hilde	2020	Zeitschrift f<U+FFFD>r P<U+FFFD>dagogische Psychologie	https://doi.org/10.1024/1010-0652/a000270
Educational Psychology	Wie wirkt das Praxissemester im Lehramtsstudium auf Studierende? Ein systematischer Review	Ulrich, Immanuel; Klingebiel, Franz; Bartels, Antonia; Staab, Ren<U+FFFD>; Scherer, Sonja; Gr<U+FFFD>schner, Alexander	2020		https://doi.org/10.1007/978-3-658-24209-1_1
Educational Psychology	Effekte digitalen Lernens auf den Wissens- und Kompetenzerwerb in der Schule. Eine Integration metaanalytischer Befunde	Stegmann, Karsten	2020	Zeitschrift f<U+FFFD>r P<U+FFFD>dagogik	http://www.beltz.de/index.php?id=186
Educational Psychology	Self-regulated learning in mathematics tertiary education	Wehner, Franziska Dorothea	2019		http://nbn-resolving.de/urn:nbn:de:tuda-tuprints-84467
Educational Psychology	Der l<U+FFFD>ngsschnittliche Zusammenhang zwischen vorschulischen Selbstregulationsf<U+FFFD>higkeiten und akademischen Kompetenzen in der Grundschule. Eine systematische Literaturanalyse	Rademacher, Annika	2019	Zeitschrift f<U+FFFD>r Entwicklungspsychologie und P<U+FFFD>dagogische Psychologie	https://doi.org/10.1026/0049-8637/a000214
Educational Psychology	Unterrichtsqualit<U+FFFD>t in den Fachdidaktiken im deutschsprachigen Raum - zwischen Generik und Fachspezifik	Praetorius, Anna-Katharina; Herrmann, Christian; Gerlach, Erin; Z<U+FFFD>lsdorf-Kersting, Meik; Heinitz, Benjamin; Nehring, Andreas	2020	Unterrichtswissenschaft	https://doi.org/10.1007/s42010-020-00082-8
Educational Psychology	A meta-analysis of the effects of teacher personality on teacher effectiveness and burnout	Kim, Lisa E.; J<U+FFFD>rg, Verena; Klassen, Robert M.	2019	Educational Psychology Review	https://doi.org/10.1007/s10648-018-9458-2
Educational Psychology	I believe, therefore I achieve (and vice versa): A meta-analytic cross-lagged panel analysis of self-efficacy and academic performance	Talsma, Kate; Sch<U+FFFD>z, Benjamin; Schwarzer, Ralf; Norris, Kimberley	2018	Learning and Individual Differences	https://doi.org/10.1016/j.lindif.2017.11.015
Educational Psychology	Has achievement goal theory been right? A meta-analysis of the relation between goal structures and personal achievement goals	Bardach, Lisa; Oczlon, Sophie; Pietschnig, Jakob; L<U+FFFD>ftenegger, Marko	2020	Journal of Educational Psychology	https://doi.org/10.1037/edu0000419
Educational Psychology	The power of feedback revisited: A meta-analysis of educational feedback research	Wisniewski, Benedikt; Zierer, Klaus; Hattie, John	2020	Frontiers in Psychology, 2020	https://doi.org/10.3389/fpsyg.2019.03087
Educational Psychology	The effects of meditation, yoga, and mindfulness on depression, anxiety, and stress in tertiary education students: A meta-analysis	Breedvelt, Josefien J. F.; Amanvermez, Yagmur; Harrer, Mathias; Karyotaki, Eirini; Gilbody, Simon; Bockting, Claudi L. H.; Cuijpers, Pim; Ebert, David D.	2019	Frontiers in Psychiatry, 2019	https://doi.org/10.3389/fpsyt.2019.00193
Educational Psychology	Are gifted students more emotionally intelligent than their non-gifted peers? A meta-analysis	Abdulla Alabbasi, Ahmed M.; Ayoub, A. Alaa Eldin; Ziegler, Albert O.	2020	High Ability Studies	https://doi.org/10.1080/13598139.2020.1770704
Educational Psychology	Improving outgroup attitudes in schools: A meta-analytic review	<U+FFFD>lger, Zuhal; Dette-Hagenmeyer, Dorothea E.; Reichle, Barbara; Gaertner, Samuel L.	2018	Journal of School Psychology	https://doi.org/10.101641.jsp.2017.10.002
Educational Psychology	Parental expectations. Intercultural perspectives and parents of children with a mental disorder	Ebeling, Markus	2020		https://doi.org/10.17192/z2020.0248
Educational Psychology	A meta-analysis of how signaling affects learning with media	Schneider, Sascha; Beege, Maik; Nebel, Steve; Rey, G<U+FFFD>nter Daniel	2018	Educational Research Review	https://doi.org/10.1016/j.edurev.2017.11.001
Educational Psychology	Openness and postsecondary academic performance: A meta-analysis of facet-, aspect-, and dimension-level correlations	Gatzka, Thomas; Hell, Benedikt	2018	Journal of Educational Psychology	https://doi.org/10.1037/edu0000194
Educational Psychology	Environmental and learner-related determinants of knowledge acquisition: Meta-analytic and longitudinal analyses	Simonsmeier, Bianca	2018		http://nbn-resolving.de/urn:nbn:de:hbz:385-11306
Educational Psychology	Active on Facebook and failing at school? Meta-analytic findings on the relationship between online social networking activities and academic achievement	Marker, Caroline; Gnambs, Timo; Appel, Markus	2018	Educational Psychology Review	https://doi.org/10.1007/s10648-017-9430-6
Educational Psychology	Additive Sprachf<U+FFFD>rderung im Elementarbereich: Wirksamkeit additiver Sprachf<U+FFFD>rderprogramme und Diagnostik von besonderem Sprachf<U+FFFD>rderbedarf	Wolf, Katrin Melanie Janina	2020		https://doi.org/10.17169/refubium-26199
Educational Psychology	Teachers' implicit attitudes toward students from different social groups: A meta-analysis	Pit-ten Cate, Ineke M.; Glock, Sabine	2019	Frontiers in Psychology, 2019	https://doi.org/10.3389/fpsyg.2019.02832
Educational Psychology	Facilitating diagnostic competences in higher education - A meta-analysis in medical and teacher education	Chernikova, Olga; Heitzmann, Nicole; Fink, Maximilian Christian; Timothy, Venance; Seidel, Tina; Fischer, Frank	2020	Educational Psychology Review	https://doi.org/10.1007/s10648-019-09492-2
Educational Psychology	The gamification of learning: A meta-analysis	Sailer, Michael; Homner, Lisa	2020	Educational Psychology Review	https://doi.org/10.1007/s10648-019-09498-w
Educational Psychology	Leisten fachspezifische Studierf<U+FFFD>higkeitstests im deutschsprachigen Raum eine valide Studienerfolgsprognose?. Ein metaanalytisches Update	Schult, Johannes; Hofmann, Arvid; Stegt, Stephan J.	2019	Zeitschrift f<U+FFFD>r Entwicklungspsychologie und P<U+FFFD>dagogische Psychologie	https://doi.org/10.1026/0049-8637/a000204
Educational Psychology	Parental educational expectations and academic achievement in children and adolescents - A meta-analysis	Pinquart, Martin; Ebeling, Markus	2020	Educational Psychology Review	https://doi.org/10.1007/s10648-019-09506-z
Educational Psychology	Do the associations of parenting styles with behavior problems and academic achievement vary by culture? Results from a meta-analysis	Pinquart, Martin; Kauser, Rubina	2018	Cultural Diversity & Ethnic Minority Psychology	https://doi.org/10.1037/cdp0000149
Educational Psychology	The relative importance of intelligence and motivation as predictors of school achievement: A meta-analysis	Kriegbaum, Katharina; Becker, Nicolas; Spinath, Birgit	2018	Educational Research Review	https://doi.org/10.1016/j.edurev.2018.10.001
Educational Psychology	The more human, the higher the performance? Examining the effects of anthropomorphism on learning with media	Schneider, Sascha; H<U+FFFD><U+FFFD>ler, Alexandra; Habermeyer, Tanja; Beege, Maik; Rey, G<U+FFFD>nter Daniel	2019	Journal of Educational Psychology	https://doi.org/10.1037/edu0000273
Educational Psychology	The contributions of knowledge and stress to academic achievement. A meta-analysis, a latent transition analysis, and a latent state-trait model	Flaig, Maja	2019		http://nbn-resolving.de/urn:nbn:de:hbz:385-1-10848
Educational Psychology	Wirksamkeit von Sprachf<U+FFFD>rderung bei Kindern und Jugendlichen mit Migrationshintergrund - eine Meta-Analyse	Beelmann, Andreas; Lutterbach, Sebastian; Schulz, Angelika; Schulz, Sebastian	2018	Politische Psychologie	http://www.psychologie-aktuell.com/index.php?id=288
Educational Psychology	Development of motivational variables and self-esteem during the school career: A meta-analysis of longitudinal studies	Scherrer, Vsevolod; Preckel, Franzis	2019	Review of Educational Research	https://doi.org/10.3102/0034654318819127
Educational Psychology	Internet interventions for mental health in university students: A systematic review and meta-analysis	Harrer, Mathias; Adam, Sophia H.; Baumeister, Harald; Cuijpers, Pim; Karyotaki, Eirini; Auerbach, Randy P.; Kessler, Ronald C.; Bruffaerts, Ronny; Berking, Matthias; Ebert, David D.	2019	International Journal of Methods in Psychiatric Research, 2019	https://doi.org/10.1002/mpr.1759
Educational Psychology	F<U+FFFD>rderung des Textverst<U+FFFD>ndnisses durch die Vermittlung von Verstehensstrategien - Eine Metaanalyse zur Effektivit<U+FFFD>t	Mayer, Andreas; Marks, Dana-Kristin	2019	Forschung Sprache	https://www.forschung-sprache.eu/
Educational Psychology	Intellectual giftedness and multidimensional perfectionism: A meta-analytic review	Stricker, Johannes; Buecker, Susanne; Schneider, Michael; Preckel, Franzis	2020	Educational Psychology Review	https://doi.org/10.1007/s10648-019-09504-1
Educational Psychology	Simulation-based learning in higher education: A meta-analysis	Chernikova, Olga; Heitzmann, Nicole; Stadler, Matthias; Holzberger, Doris; Seidel, Tina; Fischer, Frank	2020	Review of Educational Research	https://doi.org/10.3102/0034654320933544
Educational Psychology	Impact of process quality in early childhood education and care on academic outcomes: Longitudinal meta-analysis	Ulferts, Hannah; Wolf, Katrin M.; Anders, Yvonne	2019	Child Development	https://doi.org/10.1111/cdev.13296
Educational Psychology	Subjective well-being and academic achievement: A meta-analysis	B<U+FFFD>cker, Susanne; Nuraydin, Sevim; Simonsmeier, Bianca A.; Schneider, Michael; Luhmann, Maike	2018	Journal of Research in Personality	https://doi.org/10.1016/j.jrp.2018.02.007
Experimental Psychology, Neuropsychology, Biopsychology	A systematic review and meta-analysis of within-person changes in cardiac vagal activity across the menstrual cycle: Implications for female health and future studies	Schmalenberger, Katja M.; Eisenlohr-Moul, Tory A.; Würth, Lena; Schneider, Ekaterina; Thayer, Julian F.; Ditzen, Beate; Jarczok, Marc N.	2019	Journal of Clinical Medicine, 2019	https://doi.org/10.3390/jcm8111946
Experimental Psychology, Neuropsychology, Biopsychology	Neuroelectric correlates of human sexuality: A review and meta-analysis	Ziogas, Anastasios; Habermeyer, Elmar; Santtila, Pekka; Poeppl, Timm B.; Mokros, Andreas	2020	Archives of Sexual Behavior	https://doi.org/10.1007/s10508-019-01547-3
Experimental Psychology, Neuropsychology, Biopsychology	A meta-analysis of the P3 amplitude in tasks requiring deception in legal and social contexts	Leue, Anja; Beauducel, André	2019	Brain and Cognition, 2019	https://doi.org/10.1016/j.bandc.2019.05.002
Experimental Psychology, Neuropsychology, Biopsychology	Handedness and sex effects on lateral biases in human cradling: Three meta-analyses	Packheiser, Julian; Schmitz, Judith; Berretz, Gesa; Papadatou-Pastou, Marietta; Ocklenburg, Sebastian	2019	Neuroscience and Biobehavioral Reviews	https://doi.org/10.1016/j.neubiorev.2019.06.035
Experimental Psychology, Neuropsychology, Biopsychology	Menstrual cycle-related fluctuations in oxytocin concentrations: A systematic review and meta-analysis	Engel, Sinha; Klusmann, Hannah; Ditzen, Beate; Knaevelsrud, Christine; Schumacher, Sarah	2019	Frontiers in Neuroendocrinology	https://doi.org/10.1016/j.yfrne.2018.11.002
Experimental Psychology, Neuropsychology, Biopsychology	Demographic, sampling- and assay-related confounders of endogenous oxytocin concentrations: A systematic review and meta-analysis	Engel, Sinha; Laufer, Sebastian; Miller, Robert; Niemeyer, Helen; Knaevelsrud, Christine; Schumacher, Sarah	2019	Frontiers in Neuroendocrinology, 2019	https://doi.org/10.1016/j.yfrne.2019.100775
Experimental Psychology, Neuropsychology, Biopsychology	Expansive and contractive postures and movement: A systematic review and meta-analysis of the effect of motor displays on affective and behavioral responses	Elkjær, Emma; Mikkelsen, Mai B.; Michalak, Johannes; Mennin, Douglas S.; O'Toole, Mia S.	2020	Perspectives on Psychological Science	https://doi.org/10.1177/1745691620919358
Experimental Psychology, Neuropsychology, Biopsychology	Electrical brain stimulation (tES) improves learning more than performance: A meta-analysis	Simonsmeier, Bianca A.; Grabner, Roland H.; Hein, Julia; Krenz, Ugne; Schneider, Michael	2018	Neuroscience and Biobehavioral Reviews	https://doi.org/10.1016/j.neubiorev.2017.11.001
Experimental Psychology, Neuropsychology, Biopsychology	Neural processes underlying mirror-induced visual illusion: An activation likelihood estimation meta-analysis	Bello, Umar Muhammad; Kranz, Georg S.; Winser, Stanley John; Chan, Chetwyn C. H.	2020	Frontiers in Human Neuroscience, 2020	https://doi.org/10.3389/fnhum.2020.00276
Experimental Psychology, Neuropsychology, Biopsychology	Impact of early life adversities on human brain functioning: A coordinate-based meta-analysis	Kraaijenvanger, E. J.; Pollok, T. M.; Monninger, M.; Kaiser, A.; Brandeis, D.; Banaschewski, T.; Holz, N. E.	2020	Neuroscience and Biobehavioral Reviews	https://doi.org/10.1016/j.neubiorev.2020.03.008
Experimental Psychology, Neuropsychology, Biopsychology	A meta-analytic re-appraisal of the framing effect	Steiger, Alexander; Kühberger, Anton	2018	Zeitschrift für Psychologie	https://doi.org/10.1027/2151-2604/a000321
Experimental Psychology, Neuropsychology, Biopsychology	Oxytocin and brain activity in humans: A systematic review and coordinate-based meta-analysis of functional MRI studies	Grace, Sally A.; Rossell, Susan L.; Heinrichs, Markus; Kordsachia, Catarina; Labuschagne, Izelle	2018	Psychoneuroendocrinology	https://doi.org/10.1016/j.psyneuen.2018.05.031
Experimental Psychology, Neuropsychology, Biopsychology	A resting state fMRI analysis pipeline for pooling inference across diverse cohorts: An ENIGMA rs-fMRI protocol	Adhikari, Bhim M.; Jahanshad, Neda; Shukla, Dinesh; Turner, Jessica; Grotegerd, Dominik; Dannlowski, Udo; Kugel, Harald; Engelen, Jennifer; Dietsche, Bruno; Krug, Axel; Kircher, Tilo; Fieremans, Els; Veraart, Jelle; Novikov, Dmitry S.; Boedhoe, Premika S. W.; van der Werf, Ysbrand D.; van den Heuvel, Odile A.; Ipser, Jonathan; Uhlmann, Anne; Stein, Dan J.; Dickie, Erin; Voineskos, Aristotle N.; M…	2019	Brain Imaging and Behavior	https://doi.org/10.1007/s11682-018-9941-x
Experimental Psychology, Neuropsychology, Biopsychology	The psychobiology of using automated driving systems: A systematic review and integrative model	Meinlschmidt, Gunther; Stalujanis, Esther; Tegethoff, Marion	2019	Psychoneuroendocrinology	https://doi.org/10.1016/j.psyneuen.2018.09.029
Experimental Psychology, Neuropsychology, Biopsychology	The feeling of anger: From brain networks to linguistic expressions	Alia-Klein, Nelly; Gan, Gabriela; Gilam, Gadi; Bezek, Jessica; Bruno, Antonio; Denson, Thomas F.; Hendler, Talma; Lowe, Leroy; Mariotti, Veronica; Muscatello, Maria R.; Palumbo, Sara; Pellegrini, Silvia; Pietrini, Pietro; Rizzo, Amelia; Verona, Edelyn	2020	Neuroscience and Biobehavioral Reviews	https://doi.org/10.1016/j.neubiorev.2019.12.002
Experimental Psychology, Neuropsychology, Biopsychology	Systematic review and meta-analysis investigating moderators of long-term effects of exercise on cognition in healthy individuals	Ludyga, Sebastian; Gerber, Markus; Pühse, Uwe; Looser, Vera N.; Kamijo, Keita	2020	Nature Human Behaviour	https://doi.org/10.1038/s41562-020-0851-8
Experimental Psychology, Neuropsychology, Biopsychology	Cognition-oriented treatments for older adults: A systematic overview of systematic reviews	Gavelin, Hanna Malmberg; Lampit, Amit; Hallock, Harry; Sabatés, Julieta; Bahar-Fuchs, Alex	2020	Neuropsychology Review	https://doi.org/10.1007/s11065-020-09434-8
Experimental Psychology, Neuropsychology, Biopsychology	Similarity matters: A meta-analysis of interleaved learning and its moderators	Brunmair, Matthias; Richter, Tobias	2019	Psychological Bulletin	https://doi.org/10.1037/bul0000209
Experimental Psychology, Neuropsychology, Biopsychology	Psychophysiological effects of downregulating negative emotions: Insights from a meta-analysis of healthy adults	Zaehringer, Jenny; Jennen-Steinmetz, Christine; Schmahl, Christian; Ende, Gabriele; Paret, Christian	2020	Frontiers in Psychology, 2020	https://doi.org/10.3389/fpsyg.2020.00470
Experimental Psychology, Neuropsychology, Biopsychology	Brain structure and cognitive ability in healthy aging: A review on longitudinal correlated change	Oschwald, Jessica; Guye, Sabrina; Liem, Franziskus; Rast, Philippe; Willis, Sherry; Röcke, Christina; Jäncke, Lutz; Martin, Mike; Mérillat, Susan	2020	Reviews in the Neurosciences	https://doi.org/10.1515/revneuro-2018-0096
Experimental Psychology, Neuropsychology, Biopsychology	fMRI neurofeedback in emotion regulation: A literature review	Linhartová, Pavla; Látalová, Adéla; Kósa, Barbora; Kaspárek, Tomás; Schmahl, Christian; Paret, Christian	2019	NeuroImage	https://doi.org/10.1016/j.neuroimage.2019.03.011
Experimental Psychology, Neuropsychology, Biopsychology	Individual differences in risk taking and endogeneous levels of testosterone, estradiol, and cortisol: A systematic literature search and three independent meta-analyses	Kurath, Jennifer; Mata, Rui	2018	Neuroscience and Biobehavioral Reviews	https://doi.org/10.1016/j.neubiorev.2018.05.003
Experimental Psychology, Neuropsychology, Biopsychology	Digit ratio (2D:4D) in relation to substance and computer use: A meta-analysis	Siegmann, Eva-Maria; Bouna-Pyrrou, Polyxeni; Lenz, Bernd; Kornhuber, Johannes	2019	Journal of Neural Transmission	https://doi.org/10.1007/s00702-019-02002-2
Experimental Psychology, Neuropsychology, Biopsychology	Acute hunger does not always undermine prosociality	Häusser, Jan A.; Stahlecker, Christina; Mojzisch, Andreas; Leder, Johannes; Van Lange, Paul A. M.; Faber, Nadira S.	2019	Nature Communications, 2019	https://doi.org/10.1038/s41467-019-12579-7
Experimental Psychology, Neuropsychology, Biopsychology	Trade-off of cerebello-cortical and cortico-cortical functional networks for planning in 6-year-old children	Kipping, Judy A.; Margulies, Daniel S.; Eickhoff, Simon B.; Lee, Annie; Qiu, Anqi	2018	NeuroImage	https://doi.org/10.1016/j.neuroimage.2018.04.067
Experimental Psychology, Neuropsychology, Biopsychology	Influence of task instructions and stimuli on the neural network of face processing: An ALE meta-analysis	Müller, Veronika I.; Höhner, Yvonne; Eickhoff, Simon B.	2018	Cortex	https://doi.org/10.1016/j.cortex.2018.03.011
Experimental Psychology, Neuropsychology, Biopsychology	Towards a human self-regulation system: Common and distinct neural signatures of emotional and behavioural control	Langner, Robert; Leiberg, Susanne; Hoffstaedter, Felix; Eickhoff, Simon B.	2018	Neuroscience and Biobehavioral Reviews	https://doi.org/10.1016/j.neubiorev.2018.04.022
Experimental Psychology, Neuropsychology, Biopsychology	A domain-general brain network underlying emotional and cognitive interference processing: Evidence from coordinate-based and functional connectivity meta-analyses	Chen, Taolin; Becker, Benjamin; Camilleri, Julia; Wang, Li; Yu, Shuqi; Eickhoff, Simon B.; Feng, Chunliang	2018	Brain Structure and Function	https://doi.org/10.1007/s00429-018-1727-9
Experimental Psychology, Neuropsychology, Biopsychology	The neurocognitive correlates of human reasoning: A meta-analysis of conditional and syllogistic inferences	Wertheim, Julia; Ragni, Marco	2020	Journal of Cognitive Neuroscience	https://doi.org/10.1162/jocn_a_01531
Experimental Psychology, Neuropsychology, Biopsychology	Enlarged perivascular spaces and cognition. A meta-analysis of 5 population-based studies	Hilal, Saima; Tan, Chuen Seng; Adams, Hieab H. H.; Habes, Mohamad; Mok, Vincent; Venketasubramanian, Narayanaswamy; Hofer, Edith; Ikram, M. Arfan; Abrigo, Jill; Vernooij, Meike W.; Chen, Christopher; Hosten, Norbert; Volzke, Henry; Grabe, Hans J.; Schmidt, Reinhold; Ikram, M. Arfan	2018	Neurology, 2018	https://doi.org/10.1212/WNL.0000000000006079
Experimental Psychology, Neuropsychology, Biopsychology	Neural correlates of verbal working memory: An fMRI meta-analysis	Emch, Monica; von Bastian, Claudia C.; Koch, Kathrin	2019	Frontiers in Human Neuroscience, 2019	https://doi.org/10.3389/fnhum.2019.00180
Experimental Psychology, Neuropsychology, Biopsychology	Common and distinct neural correlates of dual-tasking and task-switching: A meta-analytic review and a neuro-cognitive processing model of human multitasking	Worringer, Britta; Langner, Robert; Koch, Iring; Eickhoff, Simon B.; Eickhoff, Claudia R.; Binkofski, Ferdinand C.	2019	Brain Structure and Function	https://doi.org/10.1007/s00429-019-01870-4
Experimental Psychology, Neuropsychology, Biopsychology	Is the voice an auditory face? An ALE meta-analysis comparing vocal and facial emotion processing	Schirmer, Annett	2018	Social Cognitive and Affective Neuroscience	https://doi.org/10.1093/scan/nsx142
Experimental Psychology, Neuropsychology, Biopsychology	The neural correlates of relational reasoning: A meta-analysis of 47 functional magnetic resonance studies	Wertheim, Julia; Ragni, Marco	2018	Journal of Cognitive Neuroscience	https://doi.org/10.1162/jocn_a_01311
Experimental Psychology, Neuropsychology, Biopsychology	Neural correlates of working memory training - fMRI analyses in healthy older adults	Hudl, Nicole	2020
Experimental Psychology, Neuropsychology, Biopsychology	Meta-analytic evidence for a joint neural mechanism underlying response inhibition and state anger	Puiu, Andrei A.; Wudarczyk, Olga; Kohls, Gregor; Bzdok, Danilo; Herpertz-Dahlmann, Beate; Konrad, Kerstin	2020	Human Brain Mapping	https://doi.org/10.1002/hbm.25004
Experimental Psychology, Neuropsychology, Biopsychology	Computing the social brain connectome across systems and states	Alcalá-López, Daniel; Smallwood, Jonathan; Jefferies, Elizabeth; Van Overwalle, Frank; Vogeley, Kai; Mars, Rogier B.; Turetsky, Bruce I.; Laird, Angela R.; Fox, Peter T.; Eickhoff, Simon B.; Bzdok, Danilo	2018	Cerebral Cortex	https://doi.org/10.1093/cercor/bhx121
Experimental Psychology, Neuropsychology, Biopsychology	Human handedness: A meta-analysis	Papadatou-Pastou, Marietta; Ntolka, Eleni; Schmitz, Judith; Martin, Maryanne; Munafò, Marcus R.; Ocklenburg, Sebastian; Paracchini, Silvia	2020	Psychological Bulletin	https://doi.org/10.1037/bul0000229
Experimental Psychology, Neuropsychology, Biopsychology	Neural networks of aggression: ALE meta-analyses on trait and elicited aggression	Wong, Ting Yat; Sid, Azah; Wensing, Tobias; Eickhoff, Simon B.; Habel, Ute; Gur, Ruben C.; Nickl-Jockschat, Thomas	2019	Brain Structure and Function	https://doi.org/10.1007/s00429-018-1765-3
Experimental Psychology, Neuropsychology, Biopsychology	Can we predict real-time fMRI neurofeedback learning success from pretraining brain activity?	Haugg, Amelie; Sladky, Ronald; Skouras, Stavros; McDonald, Amalia; Craddock, Cameron; Kirschner, Matthias; Herdener, Marcus; Koush, Yury; Papoutsi, Marina; Keynan, Jackob N.; Hendler, Talma; Cohen Kadosh, Kathrin; Zich, Catharina; MacInnes, Jeff; Adcock, Alison; Dickerson, Kathryn; Chen, Nan-Kuei; Young, Kymberly; Bodurka, Jerzy; Yao, Shuxia; Becker, Benjamin; Auer, Tibor; Schweizer, Renate; Pamp…	2020	Human Brain Mapping	https://doi.org/10.1002/hbm.25089
Experimental Psychology, Neuropsychology, Biopsychology	Effects of stimulant drug use on the dopaminergic system: A systematic review and meta-analysis of in vivo neuroimaging studies	Proebstl, Lisa; Kamp, Felicia; Manz, Kirsi; Krause, Daniela; Adorjan, Kristina; Pogarell, Oliver; Koller, Gabi; Soyka, Michael; Falkai, Peter; Kambeitz, Joseph	2019	European Psychiatry	https://doi.org/10.1016/j.eurpsy.2019.03.003
Experimental Psychology, Neuropsychology, Biopsychology	A meta-analysis of fMRI studies of language comprehension in children	Enge, Alexander; Friederici, Angela D.; Skeide, Michael A.	2020	NeuroImage, 2020	https://doi.org/10.1016/j.neuroimage.2020.116858
Experimental Psychology, Neuropsychology, Biopsychology	The influence of study-level inference models and study set size on coordinate-based fMRI meta-analyses	Bossier, Han; Seurinck, Ruth; Kühn, Simone; Banaschewski, Tobias; Barker, Gareth J.; Bokde, Arun L. W.; Martinot, Jean-Luc; Lemaitre, Herve; Paus, Tomàs; Millenet, Sabina; Moerkerke, Beatrijs	2018	Frontiers in Neuroscience, 2018	https://doi.org/10.3389/fnins.2017.00745
Experimental Psychology, Neuropsychology, Biopsychology	Cytoarchitecture, probability maps, and functions of the human supplementary and pre-supplementary motor areas	Ruan, Jianghai; Bludau, Sebastian; Palomero-Gallagher, Nicola; Caspers, Svenja; Mohlberg, Hartmut; Eickhoff, Simon B.; Seitz, Ruediger J.; Amunts, Katrin	2018	Brain Structure and Function	https://doi.org/10.1007/s00429-018-1738-6
Experimental Psychology, Neuropsychology, Biopsychology	The role of the anterior insula in social norm compliance and enforcement: Evidence from coordinate-based and functional connectivity meta-analyses	Bellucci, Gabriele; Feng, Chunliang; Camilleri, Julia; Eickhoff, Simon B.; Krueger, Frank	2018	Neuroscience and Biobehavioral Reviews	https://doi.org/10.1016/j.neubiorev.2018.06.024
Experimental Psychology, Neuropsychology, Biopsychology	Facial muscle movements encoding pain - S systematic review	Kunz, Miriam; Meixner, Doris; Lautenbacher, Stefan	2019	Pain	https://doi.org/10.1097/j.pain.0000000000001424
Experimental Psychology, Neuropsychology, Biopsychology	Neuroendocrine mechanisms of grief and bereavement: A systematic review and implications for future interventions	Hopf, Dora; Eckstein, Monika; Aguilar-Raab, Corina; Warth, Marco; Ditzen, Beate	2020	Journal of Neuroendocrinology, 2020	https://doi.org/10.1111/jne.12887
Experimental Psychology, Neuropsychology, Biopsychology	The relation between the intelligibility of irrelevant speech and cognitive performance - A revised model based on laboratory studies	Haapakangas, Annu; Hongisto, Valtteri; Liebl, Andreas	2020	Indoor Air	https://doi.org/10.1111/ina.12726
Experimental Psychology, Neuropsychology, Biopsychology	Automatic affective reactions to exercise-related stimuli. Towards a better understanding of exercise motivation	Schinkoeth, Michaela	2020		https://doi.org/10.25932/publishup-47111
Experimental Psychology, Neuropsychology, Biopsychology	Aftereffects and deactivation of completed prospective memory intentions: A systematic review	Möschl, Marcus; Fischer, Rico; Bugg, Julie M.; Scullin, Michael K.; Goschke, Thomas; Walser, Moritz	2020	Psychological Bulletin	https://doi.org/10.1037/bul0000221
Experimental Psychology, Neuropsychology, Biopsychology	Crying out in pain - A systematic review into the validity of vocalization as an indicator for pain	Helmer, Loreine M. L.; Weijenberg, Roxane A. F.; de Vries, Ralph; Achterberg, Wilco P.; Lautenbacher, Stefan; Sampson, Elizabeth L.; Lobbezoo, Frank	2020	European Journal of Pain	https://doi.org/10.1002/ejp.1623
Experimental Psychology, Neuropsychology, Biopsychology	Fear extinction retention: Is it what we think it is?	Lonsdorf, Tina B.; Merz, Christian J.; Fullana, Miquel A.	2019	Biological Psychiatry	https://doi.org/10.1016/j.biopsych.2019.02.011
Experimental Psychology, Neuropsychology, Biopsychology	Measuring cognitive reserve (CR) - A systematic review of measurement properties of CR questionnaires for the adult population	Kartschmit, Nadja; Mikolajczyk, Rafael; Schubert, Torsten; Lacruz, Maria Elena	2019	PLoS ONE, 2019	https://doi.org/10.1371/journal.pone.0219851
Experimental Psychology, Neuropsychology, Biopsychology	Conflict monitoring and the affective-signaling hypothesis - An integrative review	Dignath, David; Eder, Andreas B.; Steinhauser, Marco; Kiesel, Andrea	2020	Psychonomic Bulletin & Review	https://doi.org/10.3758/s13423-019-01668-9
Experimental Psychology, Neuropsychology, Biopsychology	Neural oscillations orchestrate multisensory processing	Keil, Julian; Senkowski, Daniel	2018	The Neuroscientist	https://doi.org/10.1177/1073858418755352
Experimental Psychology, Neuropsychology, Biopsychology	Emotional oddball: A review on memory effects	Schlüter, Helge; Hackländer, Ryan P.; Bermeitinger, Christina	2019	Psychonomic Bulletin & Review	https://doi.org/10.3758/s13423-019-01658-x
Experimental Psychology, Neuropsychology, Biopsychology	Sleep's impact on emotional recognition memory: A meta-analysis of whole-night, nap, and REM sleep effects	Schäfer, Sarah K.; Wirth, Benedikt E.; Staginnus, Marlene; Becker, Nicolas; Michael, Tanja; Sopp, M. Roxanne	2020	Sleep Medicine Reviews, 2020	https://doi.org/10.1016/j.smrv.2020.101280
Experimental Psychology, Neuropsychology, Biopsychology	Preferential consolidation of emotional memory during sleep: A meta-analysis	Lipinska, Gosia; Stuart, Beth; Thomas, Kevin G. F.; Baldwin, David S.; Bolinger, Elaina	2019	Frontiers in Psychology, 2019	https://doi.org/10.3389/fpsyg.2019.01014
Experimental Psychology, Neuropsychology, Biopsychology	Looking on the bright side: Replicating the association between brightness and positivity	Specker, Eva; Leder, Helmut	2018	Collabra: Psychology, 2018	https://doi.org/10.1525/collabra.168
Experimental Psychology, Neuropsychology, Biopsychology	A meta-analysis of contingent-capture effects	Büsel, Christian; Voracek, Martin; Ansorge, Ulrich	2020	Psychological Research	https://doi.org/10.1007/s00426-018-1087-3
Experimental Psychology, Neuropsychology, Biopsychology	Guessing right: Preconscious processing in inattentional blindness	Kreitz, Carina; Pugnaghi, Giulia; Memmert, Daniel	2020	Quarterly Journal of Experimental Psychology	https://doi.org/10.1177/1747021820911324
Experimental Psychology, Neuropsychology, Biopsychology	Technology-based assessment. A theoretical framework, psychometric modeling, and substantial issues in the assessment of cognitive abilities	Steger, Diana	2020		https://doi.org/10.20378/irb-47740
Experimental Psychology, Neuropsychology, Biopsychology	Registered replication report: Dijksterhuis and van Knippenberg (1998)	O'Donnell, Michael; Nelson, Leif D.; Ackermann, Evi; Aczel, Balazs; Akhar, Athfah; Aldrovandi, Silvio; Alshaif, Nasseem; Andringa, Ronald; Aveyard, Mark; Babincak, Peter; Balatekin, Nursena; Baldwin, Scott A.; Banik, Gabriel; Baskin, Ernest; Bell, Raoul; Bialobrzeska, Olga; Birt, Angie R.; Boot, Walter R.; Braithwaite, Scott R.; Briggs, Jessie C.; Buchner, Axel; Budd, Desiree; Budzik, Kathryn; Bu…	2018	Perspectives on Psychological Science	https://doi.org/10.1177/1745691618755704
Experimental Psychology, Neuropsychology, Biopsychology	The painful duality of envy: Evidence for an integrative theory and a meta-analysis on the relation of envy and schadenfreude	Lange, Jens; Weidman, Aaron C.; Crusius, Jan	2018	Journal of Personality and Social Psychology	https://doi.org/10.1037/pspi0000118
Experimental Psychology, Neuropsychology, Biopsychology	Automatic imitation: A meta-analysis	Cracco, Emiel; Bardi, Lara; Desmet, Charlotte; Genschow, Oliver; Rigoni, Davide; De Coster, Lize; Radkova, Ina; Deschrijver, Eliane; Brass, Marcel	2018	Psychological Bulletin	https://doi.org/10.1037/bul0000143
Experimental Psychology, Neuropsychology, Biopsychology	Targeting procrastination using psychological treatments: A systematic review and meta-analysis	Rozental, Alexander; Bennett, Sophie; Forsström, David; Ebert, David D.; Shafran, Roz; Andersson, Gerhard; Carlbring, Per	2018	Frontiers in Psychology, 2018	https://doi.org/10.3389/fpsyg.2018.01588
Experimental Psychology, Neuropsychology, Biopsychology	Inhibition in aging: What is preserved? What declines? A meta-analysis	Rey-Mermet, Alodie; Gade, Miriam	2018	Psychonomic Bulletin & Review	https://doi.org/10.3758/s13423-017-1384-7
Experimental Psychology, Neuropsychology, Biopsychology	Anisotropies of tactile distance perception on the face	Longo, Matthew R.; Amoruso, Elena; Calzolari, Elena; Ben Yehuda, Michael; Haggard, Patrick; Azañón, Elena	2020	Attention, Perception, & Psychophysics	https://doi.org/10.3758/s13414-020-02079-y
Experimental Psychology, Neuropsychology, Biopsychology	Intelligenz, Zielorientierung und Ego-Depletion als Antezedenzien von Adaption: Metaanalytische und experimentelle Befunde	Stasielowicz, Lukasz Patryk	2018		http://nbn-resolving.de/urn:nbn:de:gbv:700-20180815511
Experimental Psychology, Neuropsychology, Biopsychology	Age differences in hindsight bias: A meta-analysis	Groß, Julia; Pachur, Thorsten	2019	Psychology and Aging	https://doi.org/10.1037/pag0000329
Experimental Psychology, Neuropsychology, Biopsychology	Does attitude acquisition in evaluative conditioning without explicit CS-US memory reflect implicit misattribution of affect?	Mierop, Adrien; Hütter, Mandy; Stahl, Christoph; Corneille, Olivier	2019	Cognition and Emotion	https://doi.org/10.1080/02699931.2018.1435505
Experimental Psychology, Neuropsychology, Biopsychology	Coupled cognitive changes in adulthood: A meta-analysis	Tucker-Drob, Elliot M.; Brandmaier, Andreas M.; Lindenberger, Ulman	2019	Psychological Bulletin	https://doi.org/10.1037/bul0000179
Experimental Psychology, Neuropsychology, Biopsychology	A meta-analysis of the worst performance rule	Schubert, Anna-Lena	2019	Intelligence	https://doi.org/10.1016/j.intell.2019.02.003
Experimental Psychology, Neuropsychology, Biopsychology	A novel test of pure irrelevance-induced blindness	Büsel, Christian; Ditye, Thomas; Muttenthaler, Lukas; Ansorge, Ulrich	2019	Frontiers in Psychology, 2019	https://doi.org/10.3389/fpsyg.2019.00375
Experimental Psychology, Neuropsychology, Biopsychology	Emotion differentiation dissected: Between-category, within-category, and integral emotion differentiation, and their relation to well-being	Erbas, Yasemin; Ceulemans, Eva; Blanke, Elisabeth S.; Sels, Laura; Fischer, Agneta; Kuppens, Peter	2019	Cognition and Emotion	https://doi.org/10.1080/02699931.2018.1465894
Experimental Psychology, Neuropsychology, Biopsychology	Retest effects in cognitive ability tests: A meta-analysis	Scharfen, Jana; Peters, Judith Marie; Holling, Heinz	2018	Intelligence	https://doi.org/10.1016/j.intell.2018.01.003
Experimental Psychology, Neuropsychology, Biopsychology	A meta-analytic review of two modes of learning and the description-experience gap	Wulff, Dirk U.; Mergenthaler-Canseco, Max; Hertwig, Ralph	2018	Psychological Bulletin	https://doi.org/10.1037/bul0000115
Experimental Psychology, Neuropsychology, Biopsychology	The effects of imagery interventions in sports: A meta-analysis	Simonsmeier, Bianca A.; Androniea, Melina; Buecker, Susanne; Frank, Cornelia	2020	International Review of Sport and Exercise Psychology	https://doi.org/10.1080/1750984X.2020.1780627
Experimental Psychology, Neuropsychology, Biopsychology	Surprise me! On the impact of unexpected benefits on other-praising gratitude expressions	Weiss, Alexa; Burgmer, Pascal; Lange, Jens	2020	Cognition and Emotion	https://doi.org/10.1080/02699931.2020.1797638
Experimental Psychology, Neuropsychology, Biopsychology	Characterizing belief bias in syllogistic reasoning: A hierarchical Bayesian meta-analysis of ROC data	Trippas, Dries; Kellen, David; Singmann, Henrik; Pennycook, Gordon; Koehler, Derek J.; Fugelsang, Jonathan A.; Dubé, Chad	2018	Psychonomic Bulletin & Review	https://doi.org/10.3758/s13423-018-1460-7
Experimental Psychology, Neuropsychology, Biopsychology	Retest effects in working memory capacity tests: A meta-analysis	Scharfen, Jana; Jansen, Katrin; Holling, Heinz	2018	Psychonomic Bulletin & Review	https://doi.org/10.3758/s13423-018-1461-6
Experimental Psychology, Neuropsychology, Biopsychology	The relationship between motor competence and physical fitness from early childhood to early adulthood: A meta-analysis	Utesch, Till; Bardid, Farid; Büsch, Dirk; Strauss, Bernd	2019	Sports Medicine	https://doi.org/10.1007/s40279-019-01068-y
Experimental Psychology, Neuropsychology, Biopsychology	A demonstration of the Collaborative Replication and Education Project: Replication attempts of the red-romance effect	Wagge, Jordan R.; Baciu, Cristina; Banas, Kasia; Nadler, Joel T.; Schwarz, Sascha; Weisberg, Yanna; IJzerman, Hans; Legate, Nicole; Grahe, Jon	2019	Collabra: Psychology, 2019	https://doi.org/10.1525/collabra.177
Experimental Psychology, Neuropsychology, Biopsychology	The effect of aging on response congruency in task switching: A meta-analysis	Grange, James A.; Becker, Raymond B.	2019	Journals of Gerontology Series B: Psychological Sciences and Social Sciences	https://doi.org/10.1093/geronb/gbx122
Experimental Psychology, Neuropsychology, Biopsychology	Are words pre-activated probabilistically during sentence comprehension? Evidence from new data and a Bayesian random-effects meta-analysis using publicly available data	Nicenboim, Bruno; Vasishth, Shravan; Rösler, Frank	2020	Neuropsychologia, 2020	https://doi.org/10.1016/j.neuropsychologia.2020.107427
Experimental Psychology, Neuropsychology, Biopsychology	Meta-analysis of action video game impact on perceptual, attentional, and cognitive skills	Bediou, Benoit; Adams, Deanne M.; Mayer, Richard E.; Tipton, Elizabeth; Green, C. Shawn; Bavelier, Daphne	2018	Psychological Bulletin	https://doi.org/10.1037/bul0000130
Experimental Psychology, Neuropsychology, Biopsychology	The contributions of knowledge and stress to academic achievement. A meta-analysis, a latent transition analysis, and a latent state-trait model	Flaig, Maja	2019		http://nbn-resolving.de/urn:nbn:de:hbz:385-1-10848
Experimental Psychology, Neuropsychology, Biopsychology	What do we envy?. How internal and external self-relevance shape envious reactions to upward comparisons	Blatz, Lisa	2019		http://nbn-resolving.de/urn:nbn:de:hbz:38-96641
Experimental Psychology, Neuropsychology, Biopsychology	Comparing numerical comparison tasks: A meta-analysis of the variability of the Weber fraction relative to the generation algorithm	Guillaume, Mathieu; Van Rinsveld, Amandine	2018	Frontiers in Psychology, 2018	https://doi.org/10.3389/fpsyg.2018.01694
Experimental Psychology, Neuropsychology, Biopsychology	Startentscheidungen von Gleitschirmpiloten: Der Gebrauch von Heuristiken	Meindl, Konstanze; Grössenbrunner, Peter	2020	Psychologie in Österreich	https://www.boep.or.at/service/fachzeitschrift-psychologie-in-oesterreich
Experimental Psychology, Neuropsychology, Biopsychology	Abstract thinking increases support for affirmative action	Fleischmann, Alexandra; Burgmer, Pascal	2020	Sex Roles	https://doi.org/10.1007/s11199-019-01068-2
Experimental Psychology, Neuropsychology, Biopsychology	On selecting evidence to test hypotheses: A theory of selection tasks	Ragni, Marco; Kola, Ilir; Johnson-Laird, Philip N.	2018	Psychological Bulletin	https://doi.org/10.1037/bul0000146
Experimental Psychology, Neuropsychology, Biopsychology	Attentional bias toward and distractibility by sexual cues: A meta-analytic integration	Strahler, J.; Baranowski, A. M.; Walter, B.; Huebner, N.; Stark, R.	2019	Neuroscience and Biobehavioral Reviews	https://doi.org/10.1016/j.neubiorev.2019.07.015
Forensic Psychology	Reviewing radicalization research using a network approach	Batzdorfer, Veronika; Steinmetz, Holger	2020	Journal for Deradicalization	https://journals.sfu.ca/jd/index.php/jd/article/view/361/235
Forensic Psychology	Literatur<U+FFFD>bersicht zur pr<U+FFFD>diktiven Validit<U+FFFD>t des Static-99 im deutschsprachigen Raum	Kube, Silvia; Banse, Rainer	2020	Forensische Psychiatrie, Psychologie, Kriminologie	https://doi.org/10.1007/s11757-020-00616-x
Forensic Psychology	A view behind the mask of sanity: Meta-analysis of aberrant brain activity in psychopaths	Poeppl, Timm B.; Donges, Maximilian R.; Mokros, Andreas; Rupprecht, Rainer; Fox, Peter T.; Laird, Angela R.; Bzdok, Danilo; Langguth, Berthold; Eickhoff, Simon B.	2019	Molecular Psychiatry	https://doi.org/10.1038/s41380-018-0122-5
Forensic Psychology	Spricht ein unauff<U+FFFD>lliger Haftverlauf gegen das Vorliegen einer dissozialen Pers<U+FFFD>nlichkeitsst<U+FFFD>rung?. Eine systematische <U+FFFD>bersicht <U+FFFD>ber Forschungsbefunde zu Zusammenh<U+FFFD>ngen	Heering, Nina	2020	RPsych - Rechtspsychologie	https://doi.org/10.5771/2365-1083-2020-2-259
Forensic Psychology	Reliability and perceived credibility of older eyewitnesses	Martschuk, Natalie	2019		http://nbn-resolving.de/urn:nbn:de:hebis:26-opus-147985
Forensic Psychology	Does constructing a facial composite affect eyewitness memory? A research synthesis and meta-analysis	Tredoux, Colin G.; Sporer, Siegfried L.; Vredeveldt, Annelies; Kempen, Kate; Nortje, Alicia	2020	Journal of Experimental Criminology	https://doi.org/10.1007/s11292-020-09432-z
Forensic Psychology	Rückfallbegünstigende und rückfallprotektive Faktoren nach der Entlassung aus dem Maßregelvollzug	Walde, Peggy; Lungwitz, Vivien	2020	Forensische Psychiatrie, Psychologie, Kriminologie	https://doi.org/10.1007/s11757-020-00615-y
General Clinical Psychology and other Disorders	The role of self-esteem in the treatment of patients with anorexia nervosa - A systematic review and meta-analysis	Kästner, Denise; Löwe, Bernd; Gumz, Antje	2019	International Journal of Eating Disorders	https://doi.org/10.1002/eat.22975
General Clinical Psychology and other Disorders	Gain-of-function variants in the melanocortin 4 receptor gene confer susceptibility to binge eating disorder in subjects with obesity: A systematic review and meta-analysis	Qasim, A.; Mayhew, A. J.; Ehtesham, S.; Alyass, A.; Volckmar, A.-L.; Herpertz, S.; Hinney, A.; Hebebrand, J.; Meyre, D.	2019	Obesity Reviews	https://doi.org/10.1111/obr.12761
General Clinical Psychology and other Disorders	Sex differences in orthorexic eating behaviors: A systematic review and meta-analytical integration	Strahler, Jana	2019	Nutrition, 2019	https://doi.org/10.1016/j.nut.2019.06.015
General Clinical Psychology and other Disorders	Psychotherapeutische Interventionen für Jugendliche mit nicht-suizidalem selbstverletzenden Verhalten (NSSV)	Kothgassner, Oswald D.; Goreis, Andreas; Plener, Paul L.	2020	Verhaltenstherapie mit Kindern & Jugendlichen	http://www.dgvt-verlag.de
General Clinical Psychology and other Disorders	Does treatment method matter? A meta-analysis of the past 20 years of research on therapeutic interventions for self-harm and suicidal ideation in adolescents	Kothgassner, Oswald D.; Robinson, Kealagh; Goreis, Andreas; Ougrin, Dennis; Plener, Paul L.	2020	Borderline Personality Disorder and Emotion Dysregulation, 2020	https://doi.org/10.1186/s40479-020-00123-9
General Clinical Psychology and other Disorders	Internet-based cognitive behavioral therapy to reduce suicidal ideation: A systematic review and meta-analysis	Büscher, Rebekka; Torok, Michelle; Terhorst, Yannik; Sander, Lasse	2020	JAMA Network Open, 2020	https://doi.org/10.1001/jamanetworkopen.2020.3933
General Clinical Psychology and other Disorders	Response rates in patients with schizophrenia and positive symptoms receiving cognitive behavioural therapy: A systematic review and single-group meta-analysis	Bighelli, Irene; Huhn, Maximilian; Schneider-Thoma, Johannes; Krause, Marc; Reitmeir, Cornelia; Wallis, Sofia; Schwermann, Felicitas; Pitschel-Walz, Gabi; Barbui, Corrado; Furukawa, Toshi A.; Leucht, Stefan	2018	BMC Psychiatry, 2018	https://doi.org/10.1186/s12888-018-1964-8
General Clinical Psychology and other Disorders	Efficacy and moderators of cognitive behavioural therapy for psychosis versus other psychological interventions: An individual-participant data meta-analysis	Turner, David T.; Reijnders, Mirjam; van der Gaag, Mark; Karyotaki, Eirini; Valmaggia, Lucia R.; Moritz, Steffen; Lecomte, Tania; Turkington, Douglas; Penades, Rafael; Elkis, Helio; Cather, Corinne; Shawyer, Frances; O'Connor, Kieron; Li, Zhan-Jiang; de Paiva Barretto, Eliza Martha; Cuijpers, Pim	2020	Frontiers in Psychiatry, 2020	https://doi.org/10.3389/fpsyt.2020.00402
General Clinical Psychology and other Disorders	Childhood maltreatment and treatment outcome in psychotic disorders: A systematic review and meta-analysis	Thomas, S.; Höfler, M.; Schäfer, I.; Trautmann, S.	2019	Acta Psychiatrica Scandinavica	https://doi.org/10.1111/acps.13077
General Clinical Psychology and other Disorders	Multi-outcome meta-analysis (MOMA) of cognitive remediation in schizophrenia: Revisiting the relevance of human coaching and elucidating interplay between multiple outcomes	Kambeitz-Ilankovic, Lana; Betz, Linda T.; Dominke, Clara; Haas, Shalaila S.; Subramaniam, Karuna; Fisher, Melisa; Vinogradov, Sophia; Koutsouleris, Nikolaos; Kambeitz, Joseph	2019	Neuroscience and Biobehavioral Reviews	https://doi.org/10.1016/j.neubiorev.2019.09.031
General Clinical Psychology and other Disorders	Functional neuroimaging correlates of aggression in psychosis: A systematic review with recommendations for future research	Widmayer, Sonja; Borgwardt, Stefan; Lang, Undine E.; Stieglitz, Rolf-Dieter; Huber, Christian G.	2019	Frontiers in Psychiatry, 2019	https://doi.org/10.3389/fpsyt.2018.00777
General Clinical Psychology and other Disorders	Association of suicidal behavior with exposure to suicide and suicide attempt: A systematic review and multilevel meta-analysis	Hill, Nicole T. M.; Robinson, Jo; Pirkis, Jane; Andriessen, Karl; Krysinska, Karolina; Payne, Amber; Boland, Alexandra; Clarke, Alison; Milner, Allison; Witt, Katrina; Krohn, Stephan; Lampit, Amit	2020	PLOS Medicine, 2020	https://doi.org/10.1371/journal.pmed.1003074
General Clinical Psychology and other Disorders	Association between suicide reporting in the media and suicide: Systematic review and meta-analysis	Niederkrotenthaler, Thomas; Braun, Marlies; Pirkis, Jane; Till, Benedikt; Stack, Steven; Sinyor, Mark; Tran, Ulrich S.; Voracek, Martin; Cheng, Qijin; Arendt, Florian; Scherr, Sebastian; Yip, Paul S. F.; Spittal, Matthew J.	2020	BMJ (British Medical Journal), 2020	https://doi.org/10.1136/bmj.m575
General Clinical Psychology and other Disorders	Deciphering reward-based decision-making in schizophrenia: A meta-analysis and behavioral modeling of the Iowa Gambling Task	Betz, Linda T.; Brambilla, Paolo; Ilankovic, Andrej; Premkumar, Preethi; Kim, Myung-Sun; Raffard, Stéphane; Bayard, Sophie; Hori, Hikaru; Lee, Kyoung-Uk; Lee, Seung Jae; Koutsouleris, Nikolaos; Kambeitz, Joseph	2019	Schizophrenia Research	https://doi.org/10.1016/j.schres.2018.09.009
General Clinical Psychology and other Disorders	Does Eysenck's personality model capture psychosis-proneness? A systematic review and meta-analysis	Knezevic, Goran; Lazarevic, Ljiljana B.; Puric, Danka; Bosnjak, Michael; Teovanovic, Predrag; Petrovic, Boban; Opacic, Goran	2019	Personality and Individual Differences	https://doi.org/10.1016/j.paid.2019.02.009
General Clinical Psychology and other Disorders	The relevance of cognitive emotion regulation to psychotic symptoms - A systematic review and meta-analysis	Ludwig, Lea; Werner, Dirk; Lincoln, Tania M.	2019	Clinical Psychology Review, 2019	https://doi.org/10.1016/j.cpr.2019.101746
General Clinical Psychology and other Disorders	Die Rolle von Emotionsregulation in der Entstehung psychotischer Störungen. Beiträge aus Fragebogenstudien, experimentellen Untersuchungen und Experience Sampling Studien	Ludwig-Eli, Lea	2020		http://nbn-resolving.de/urn:nbn:de:gbv:18-104401
General Clinical Psychology and other Disorders	Migration and schizophrenia: Meta-analysis and explanatory framework	Henssler, Jonathan; Brandt, Lasse; Müller, Martin; Liu, Shuyan; Montag, Christiane; Sterzer, Philipp; Heinz, Andreas	2020	European Archives of Psychiatry and Clinical Neuroscience	https://doi.org/10.1007/s00406-019-01028-7
General Clinical Psychology and other Disorders	Structural magnetic resonance imaging correlates of aggression in psychosis: A systematic review and effect size analysis	Widmayer, Sonja; Sowislo, Julia F.; Jungfer, Hermann A.; Borgwardt, Stefan; Lang, Undine E.; Stieglitz, Rolf D.; Huber, Christian G.	2018	Frontiers in Psychiatry, 2018	https://doi.org/10.3389/fpsyt.2018.00217
General Clinical Psychology and other Disorders	Wirksamkeit, Moderatoren und Mediatoren manualisierter familienbasierter Therapie bei Jugendlichen mit Essstörungen: Eine systematische Übersichtsarbeit	Schlegl, Sandra; Voderholzer, Ulrich; Maier, Julia; Naab, Silke; Lock, James	2020	PPmP - Psychotherapie, Psychosomatik, Medizinische Psychologie	https://doi.org/10.1055/a-0977-3413
General Clinical Psychology and other Disorders	Effectiveness of body image directed interventions in patients with anorexia nervosa: A systematic review	Ziser, Katrin; Mölbert, Simone Claire; Stuber, Felicitas; Giel, Katrin Elisabeth; Zipfel, Stephan; Junne, Florian	2018	International Journal of Eating Disorders	https://doi.org/10.1002/eat.22946
General Clinical Psychology and other Disorders	Effects of yoga on eating disorders - A systematic review	Ostermann, Thomas; Vogel, Hannah; Boehm, Katja; Cramer, Holger	2019	Complementary Therapies in Medicine	https://doi.org/10.1016/j.ctim.2019.07.021
General Clinical Psychology and other Disorders	Abnormalities in the EEG power spectrum in bulimia nervosa, binge-eating disorder, and obesity: A systematic review	Blume, Marie; Schmidt, Ricarda; Hilbert, Anja	2019	European Eating Disorders Review	https://doi.org/10.1002/erv.2654
General Clinical Psychology and other Disorders	"To tip the scale" - Weight-related discrimination and consequences on the treatment of obesity	Jung, Franziska	2018		http://nbn-resolving.de/urn:nbn:de:bsz:15-qucosa2-314367
General Clinical Psychology and other Disorders	Body image disturbance in children and adolescents with anorexia nervosa and bulimia nervosa: A systematic review	Sattler, Frank A.; Eickmeyer, Sarah; Eisenkolb, Julia	2020	Eating and Weight Disorders - Studies on Anorexia, Bulimia and Obesity	https://doi.org/10.1007/s40519-019-00725-5
General Clinical Psychology and other Disorders	How do patients with eating disorders perceive and evaluate food portion sizes? A systematic review	Dörsam, Annica Franziska; Mack, Isabelle; Kögel, Laura; Zipfel, Stephan; Giel, Katrin Elisabeth	2020	European Eating Disorders Review	https://doi.org/10.1002/erv.2743
General Clinical Psychology and other Disorders	Extend, pathomechanism and clinical consequences of brain volume changes in anorexia nervosa	Seitz, Jochen; Konrad, Kerstin; Herpertz-Dahlmann, Beate	2018	Current Neuropharmacology	https://doi.org/10.2174/1570159X15666171109145651
General Clinical Psychology and other Disorders	The role of body image disturbance in the onset, maintenance, and relapse of anorexia nervosa: A systematic review	Glashouwer, Klaske A.; van der Veer, Roosmarijn M. L.; Adipatria, Fayanadya; de Jong, Peter J.; Vocks, Silja	2019	Clinical Psychology Review, 2019	https://doi.org/10.1016/j.cpr.2019.101771
General Clinical Psychology and other Disorders	Efficacy of different versions of Aggression Replacement Training (ART): A review	Ensafdaran, Faride; Krahé, Barbara; Njad, Soodabe Bassak; Arshadi, Nasrin	2019	Aggression and Violent Behavior	https://doi.org/10.1016/j.avb.2019.02.006
General Clinical Psychology and other Disorders	Psychotherapeutic treatment for anorexia nervosa: A systematic review and network meta-analysis	Zeeck, Almut; Herpertz-Dahlmann, Beate; Friederich, Hans-Christoph; Brockmeyer, Timo; Resmark, Gaby; Hagenah, Ulrich; Ehrlich, Stefan; Cuntz, Ulrich; Zipfel, Stephan; Hartmann, Armin	2018	Frontiers in Psychiatry, 2018	https://doi.org/10.3389/fpsyt.2018.00158
General Clinical Psychology and other Disorders	Efficacy of psychotherapies and pharmacotherapies for bulimia nervosa	Svaldi, Jennifer; Schmitz, Florian; Baur, Julia; Hartmann, Andrea S.; Legenbauer, Tanja; Thaler, Charlotte; von Wietersheim, Jörn; de Zwaan, Martina; Tuschen-Caffier, Brunna	2019	Psychological Medicine	https://doi.org/10.1017/S0033291718003525
General Clinical Psychology and other Disorders	Meta-analysis of the efficacy of psychological and medical treatments for binge-eating disorder	Hilbert, Anja; Petroff, David; Herpertz, Stephan; Pietrowsky, Reinhard; Tuschen-Caffier, Brunna; Vocks, Silja; Schmidt, Ricarda	2019	Journal of Consulting and Clinical Psychology	https://doi.org/10.1037/ccp0000358
General Clinical Psychology and other Disorders	Social determinants of obesity: How parents shape the eating behavior and body weight of their children	Dallacker, Mattea	2018		http://nbn-resolving.de/urn:nbn:de:kobv:188-fudissthesis000000106227-0
General Clinical Psychology and other Disorders	Psychotherapy for eating disorders: A meta-analysis of direct comparisons	Grenon, Renee; Carlucci, Samantha; Brugnera, Agostino; Schwartze, Dominique; Hammond, Nicole; Ivanova, Iryna; Mcquaid, Nancy; Proulx, Genevieve; Tasca, Giorgio A.	2019	Psychotherapy Research	https://doi.org/10.1080/10503307.2018.1489162
General Clinical Psychology and other Disorders	An overview of the evidence for psychological interventions for psychosis: Results from meta-analyses	Lincoln, Tania M.; Pedersen, Anya	2019	Clinical Psychology in Europe, 2019	https://doi.org/10.32872/cpe.v1i1.31407
General Clinical Psychology and other Disorders	Basics of evidence-based rehabilitation in individuals with schizophrenia. Grundlagen evidenzbasierter Rehabilitation von Schizophrenieerkrankten	Rakitzi, Stavroula	2020		http://nbn-resolving.de/urn:nbn:de:kola-21399
General Clinical Psychology and other Disorders	A systematic scoping review of psychological therapies for psychosis within acute psychiatric in-patient settings	Jacobsen, Pamela; Hodkinson, Kathleen; Peters, Emmanuelle; Chadwick, Paul	2018	British Journal of Psychiatry	https://doi.org/10.1192/bjp.2018.106
General Clinical Psychology and other Disorders	Practitioner review: Unguided and guided self-help interventions for common mental health disorders in children and adolescents: A Practitioner review: Unguided and guided self-help interventions for common mental health disorders in children and adolescents: A systematic review and meta-analysis	Bennett, Sophie D.; Cuijpers, Pim; Ebert, David Daniel; McKenzie Smith, Mhairi; Coughtrey, Anna E.; Heyman, Isobel; Manzotti, Grazia; Shafran, Roz	2019	Journal of Child Psychology and Psychiatry	https://doi.org/10.1111/jcpp.13010
General Clinical Psychology and other Disorders	Wirksamkeit von Interventionen zur Stärkung kognitiver Ressourcen bei Bewohnenden in Pflegeheimen . Eine systematische Übersichtsarbeit und Netzwerkmetaanalyse	Wöhl, C.; Siebert, H.; Blättner, B.	2020	Zeitschrift für Gerontologie und Geriatrie	https://doi.org/10.1007/s00391-019-01654-9
General Clinical Psychology and other Disorders	The phenomenon of treatment dropout, reasons and moderators in acceptance and commitment therapy and other active treatments. A meta-analytic review	Karekla, Maria; Konstantinou, Pinelopi; Ioannou, Myria; Kareklas, Ioannis; Gloster, Andrew T.	2019	Clinical Psychology in Europe, 2019	https://doi.org/10.32872/cpe.v1i3.33058
General Clinical Psychology and other Disorders	Effectiveness of metacognitive interventions for mental disorders in adults - A systematic review and meta-analysis (METACOG)	Philipp, Rebecca; Kriston, Levente; Lanio, Jana; Kühne, Franziska; Härter, Martin; Moritz, Steffen; Meister, Ramona	2019	Clinical Psychology and Psychotherapy	https://doi.org/10.1002/cpp.2345
General Clinical Psychology and other Disorders	Web-based bereavement care: A systematic review and meta-analysis	Wagner, Birgit; Rosenberg, Nicole; Hofmann, Laura; Maass, Ulrike	2020	Frontiers in Psychiatry, 2020	https://doi.org/10.3389/fpsyt.2020.00525
General Clinical Psychology and other Disorders	The diagnosis and treatment of dyscalculia	Haberstroh, Stefan; Schulte-Körne, Gerd	2019	Deutsches Ärzteblatt International	https://doi.org/10.3238/arztebl.2019.0107
General Clinical Psychology and other Disorders	Coping as a mediator between locus of control, competence beliefs, and mental health: A systematic review and structural equation modelling meta-analysis	Groth, Nicola; Schnyder, Nina; Kaess, Michael; Markovic, Andjela; Rietschel, Liz; Moser, Susann; Michel, Chantal; Schultze-Lutter, Frauke; Schmidt, Stefanie J.	2019	Behaviour Research and Therapy, 2019	https://doi.org/10.1016/j.brat.2019.103442
General Clinical Psychology and other Disorders	Effects of bereavement groups - A systematic review and meta-analysis	Maass, Ulrike; Hofmann, Laura; Perlinger, Julia; Wagner, Birgit	2020	Death Studies	https://doi.org/10.1080/07481187.2020.1772410
General Clinical Psychology and other Disorders	Exogenous effects of oxytocin in five psychiatric disorders: A systematic review, meta-analyses and a personalized approach through the lens of the social salience hypothesis	Peled-Avron, Leehe; Abu-Akel, Ahmad; Shamay-Tsoory, Simone	2020	Neuroscience and Biobehavioral Reviews	https://doi.org/10.1016/j.neubiorev.2020.04.023
General Clinical Psychology and other Disorders	The efficacy of metacognitive therapy: A systematic review and meta-analysis	Normann, Nicoline; Morina, Nexhmedin	2018	Frontiers in Psychology, 2018	https://doi.org/10.3389/fpsyg.2018.02211
General Clinical Psychology and other Disorders	How reliable are therapeutic competence ratings? Results of a systematic review and meta-analysis	Kühne, Franziska; Meister, Ramona; Maaß, Ulrike; Paunov, Tatjana; Weck, Florian	2020	Cognitive Therapy and Research	https://doi.org/10.1007/s10608-019-10056-5
General Clinical Psychology and other Disorders	Ein systematisches Review zur familiären Transmission von Suizidalität: Ist Suizidalität vererbbar?	Knappe, Susanne; Ollmann, Theresa Magdalena; Neumer, Anna	2020	Suizidprophylaxe	http://www.suizidprophylaxe-online.de/
General Clinical Psychology and other Disorders	Wetter und Suizid. Assoziation zwischen meteorologischen Variablen und suizidalem Verhalten - eine qualitative systematische Übersichtsarbeit	Pervilhac, Charlotte; Schoilew, Kyrill; Znoj, Hansjörg; Müller, Thomas J.	2020	Der Nervenarzt	https://doi.org/10.1007/s00115-019-00795-x
General Clinical Psychology and other Disorders	Personality-obesity associations are driven by narrow traits: A meta-analysis	Vainik, Uku; Dagher, Alain; Realo, Anu; Mortensen, Erik Lykke; Jang, Kerry; Juko, Ando; Kandler, Christian	2019	Obesity Reviews	https://doi.org/10.1111/obr.12856
General Clinical Psychology and other Disorders	Grey matter alterations in obesity: A meta-analysis of whole-brain studies	Herrmann, Martin J.; Tesar, Ann-Katrin; Beier, Jennifer; Berg, Max; Warrings, Bodo	2019	Obesity Reviews	https://doi.org/10.1111/obr.12799
General Clinical Psychology and other Disorders	The impact of maternal eating disorders on dietary intake and eating patterns during pregnancy: A systematic review	Dörsam, Annica F.; Preißl, Hubert; Micali, Nadia; Lörcher, Sophia B.; Zipfel, Stephan; Giel, Katrin E.	2019	Nutrients, 2019	https://doi.org/10.3390/nu11040840
General Clinical Psychology and other Disorders	The association between weight stigma and mental health: A meta-analysis	Emmer, Christine; Bosnjak, Michael; Mata, Jutta	2020	Obesity Reviews, 2020	https://doi.org/10.1111/obr.12935
General Clinical Psychology and other Disorders	Validity and utility of Hierarchical Taxonomy of Psychopathology (HiTOP): I. Psychosis superspectrum	Kotov, Roman; Jonas, Katherine G.; Carpenter, William T.; Dretsch, Michael N.; Eaton, Nicholas R.; Forbes, Miriam K.; Forbush, Kelsie T.; Hobbs, Kelsey; Reininghaus, Ulrich; Slade, Tim; South, Susan C.; Sunderland, Matthew; Waszczuk, Monika A.; Widiger, Thomas A.; Wright, Aidan G. C.; Zald, David H.; Krueger, Robert F.; Watson, David	2020	World Psychiatry	https://doi.org/10.1002/wps.20730
General Clinical Psychology and other Disorders	Health literacy in clinical-high-risk individuals for psychosis: A systematic mixed-methods review	Haidl, Theresa K.; Seves, Mauro; Eggers, Susanne; Rostamzadeh, Ayda; Genske, Anna; Jünger, Saskia; Woopen, Christiane; Jessen, Frank; Ruhrmann, Stephan; Vogeley, Kai	2019	Early Intervention in Psychiatry	https://doi.org/10.1111/eip.12776
General Clinical Psychology and other Disorders	Predictors of persisting psychotic like experiences in children and adolescents: A scoping review	Kalman, Janos L.; Bresnahan, Michaeline; Schulze, Thomas G.; Susser, Ezra	2019	Schizophrenia Research	https://doi.org/10.1016/j.schres.2019.05.012
General Clinical Psychology and other Disorders	Neural correlates of social cognition in populations at risk of psychosis: A systematic review	Kozhuharova, P.; Saviola, F.; Ettinger, U.; Allen, P.	2020	Neuroscience and Biobehavioral Reviews	https://doi.org/10.1016/j.neubiorev.2019.10.010
General Clinical Psychology and other Disorders	Psychological interventions for positive symptoms in schizophrenia: Protocol for a network meta-analysis of randomised controlled trials	Bighelli, Irene; Salanti, Georgia; Reitmeir, Cornelia; Wallis, Sofia; Barbui, Corrado; Furukawa, Toshi A.; Leucht, Stefan	2018	BMJ Open, 2018	https://doi.org/10.1136/bmjopen-2017-019280
General Clinical Psychology and other Disorders	Psychological interventions to reduce positive symptoms in schizophrenia: Systematic review and network meta-analysis	Bighelli, Irene; Salanti, Georgia; Huhn, Maximilian; Schneider-Thoma, Johannes; Krause, Marc; Reitmeir, Cornelia; Wallis, Sofia; Schwermann, Felicitas; Pitschel-Walz, Gabi; Barbui, Corrado; Furukawa, Toshi A.; Leucht, Stefan	2018	World Psychiatry	https://doi.org/10.1002/wps.20577
General Clinical Psychology and other Disorders	Group therapy for schizophrenia: A meta-analysis	Burlingame, Gary M.; Svien, Hal; Hoppe, Lars; Hunt, Isaac; Rosendahl, Jenny	2020	Psychotherapy: Theory, Research, Practice, Training	https://doi.org/10.1037/pst0000293
General Clinical Psychology and other Disorders	Effects of multiple forms of information bias on estimated prevalence of suicide attempts according to sexual orientation: An application of a Bayesian misclassification correction method to data from a systematic review	Salway, Travis; Plöderl, Martin; Liu, Juxin; Gustafson, Paul	2019	American Journal of Epidemiology	https://doi.org/10.1093/aje/kwy200
General Clinical Psychology and other Disorders	Is there a female cycle of violence after exposure to childhood maltreatment? A meta-analysis	Augsburger, Mareike; Basler, Kayley; Maercker, Andreas	2019	Psychological Medicine	https://doi.org/10.1017/S0033291719000680
General Clinical Psychology and other Disorders	Cognition and oculomotor control in model systems of psychosis	Steffens, Maria	2020		http://nbn-resolving.de/urn:nbn:de:hbz:5-58562
General Clinical Psychology and other Disorders	Meta-analytic evidence for altered mesolimbic responses to reward in schizophrenia	Chase, Henry W.; Loriemi, Polina; Wensing, Tobias; Eickhoff, Simon B.; Nickl-Jockschat, Thomas	2018	Human Brain Mapping	https://doi.org/10.1002/hbm.24049
General Clinical Psychology and other Disorders	Test-retest reliability of the diagnosis of schizoaffective disorder in childhood and adolescence - A systematic review and meta-analysis	Salamon, Sarah; Santelmann, Hanno; Franklin, Jeremy; Baethge, Christopher	2018	Journal of Affective Disorders	https://doi.org/10.1016/j.jad.2017.12.070
General Clinical Psychology and other Disorders	Prefrontal cortical thinning links to negative symptoms in schizophrenia via the ENIGMA consortium	Walton, E.; Hibar, D. P.; van Erp, T. G. M.; Potkin, S. G.; Roiz-Santianez, R.; Crespo-Facorro, B.; Suarez-Pinilla, P.; van Haren, N. E. M.; de Zwarte, S. M. C.; Kahn, R. S.; Cahn, W.; Doan, N. T.; Jorgensen, K. N.; Gurholt, T. P.; Agartz, I.; Andreassen, O. A.; Westlye, L. T.; Melle, I.; Berg, A. O.; Morch-Johnsen, L.; Faerden, A.; Flyckt, L.; Jönsson, E. G.; Hashimoto, R.; Yamamori, H.; Fukunag…	2018	Psychological Medicine	https://doi.org/10.1017/S0033291717001283
General Clinical Psychology and other Disorders	An overlapping pattern of cerebral cortical thinning is associated with both positive symptoms and aggression in schizophrenia via the ENIGMA consortium	Wong, Ting Yat; Radua, Joaquim; Pomarol-Clotet, Edith; Salvador, Raymond; Albajes-Eizagirre, Anton; Solanes, Aleix; Canales-Rodriguez, Erick J.; Guerrero-Pedraza, Amalia; Sarro, Salvador; Kircher, Tilo; Nenadic, Igor; Krug, Axel; Grotegerd, Dominik; Dannlowski, Udo; Borgwardt, Stefan; Riecher-Rössler, Anita; Schmidt, Andre; Andreou, Christina; Huber, Christian; Turner, Jessica; Calhoun, Vince; Ji…	2020	Psychological Medicine	https://doi.org/10.1017/S0033291719002149
General Clinical Psychology and other Disorders	Psychotherapie für taube Patienten durch hörende Psychotherapeuten mittels Gebärdensprachdolmetscher - ein Systematisches Literaturreview zu Forschungsbefunden und Empfehlungen	Schmidt, Steffi; Metzner, Franka	2020	Das Gesundheitswesen	https://doi.org/10.1055/a-1033-7449
General Clinical Psychology and other Disorders	Development of the generic, multidimensional Treatment Expectation Questionnaire (TEX-Q) through systematic literature review, expert surveys and qualitative interviews	Alberts, Jannis; Löwe, Bernd; Glahn, Maja Alicia; Petrie, Keith; Laferton, Johannes; Nestoriuc, Yvonne; Shedden-Mora, Meike	2020	BMJ Open, 2020	https://doi.org/10.1136/bmjopen-2019-036169
General Clinical Psychology and other Disorders	Wie kann Reden helfen?. Zur therapeutischen Funktion von Sprache in der Psychotherapie	Marx, Christopher	2020		https://doi.org/10.17170/kobra-202007191464
General Clinical Psychology and other Disorders	"Placebo by proxy" and "nocebo by proxy" in children: A review of parents' role in treatment outcomes	Czerniak, Efrat; Oberlander, Tim F.; Weimer, Katja; Kossowsky, Joe; Enck, Paul	2020	Frontiers in Psychiatry, 2020	https://doi.org/10.3389/fpsyt.2020.00169
General Clinical Psychology and other Disorders	Internet- and mobile-based aftercare and relapse prevention in mental disorders: A systematic review and recommendations for future research	Hennemann, Severin; Farnsteiner, Sylvia; Sander, Lasse	2018	Internet Interventions	https://doi.org/10.1016/j.invent.2018.09.001
General Clinical Psychology and other Disorders	Using the refined ICF Linking Rules to compare the content of existing instruments and assessments: A systematic review and exemplary analysis of instruments measuring participation	Ballert, Carolina S.; Hopfe, Maren; Kus, Sandra; Mader, Luzius; Prodinger, Birgit	2019	Disability and Rehabilitation	https://doi.org/10.1080/09638288.2016.1198433
General Clinical Psychology and other Disorders	Clinical review: The therapeutic use of theta-burst stimulation in mental disorders and tinnitus	Schwippel, Tobias; Schroeder, Philipp A.; Fallgatter, Andreas J.; Plewnia, Christian	2019	Progress in Neuro-Psychopharmacology & Biological Psychiatry	https://doi.org/10.1016/j.pnpbp.2019.01.014
General Clinical Psychology and other Disorders	Interventionsprogramme bei psychischen Belastungen von Kindern von Militärangehörigen in den USA. Ergebnisse eines systematischen Literaturreviews hinsichtlich der Übertragbarkeit auf Deutschland	Cunitz, Katrin; Bühler, Antje; Willmund, Gerd-Dieter; Ziegenhain, Ute; Fegert, Jörg M.; Zimmermann, Peter; Kölch, Michael G.	2019	Zeitschrift für Kinder- und Jugendpsychiatrie und Psychotherapie	https://doi.org/10.1024/1422-4917/a000675
General Clinical Psychology and other Disorders	Sandplay therapy: An overview of theory, applications and evidence base	Roesler, Christian	2019	The Arts in Psychotherapy	https://doi.org/10.1016/j.aip.2019.04.001
General Clinical Psychology and other Disorders	Health-related preferences of older patients with multimorbidity: The protocol for an evidence map	Isabel González-González, Ana; Schmucker, Christine; Blom, Jeanet; van den Akker, Marjan; Nguyen, Truc Sophia; Nothacker, Julia; Meerpohl, Joerg J.; Röttger, Kristian; Wegwarth, Odette; Hoffmann, Tammy; Straus, Sharon E.; Gerlach, Ferdinand M.; Muth, Christiane	2019	BMJ Open, 2019	https://doi.org/10.1136/bmjopen-2019-029724
General Clinical Psychology and other Disorders	German language questionnaires for assessing implementation constructs and outcomes of psychosocial and health-related interventions: A systematic review	Kien, Christina; Schultes, Marie-Therese; Szelag, Monika; Schoberberger, Rudolf; Gartlehner, Gerald	2018	Implementation Science, 2018	https://doi.org/10.1186/s13012-018-0837-3
General Clinical Psychology and other Disorders	Wem nützt die App? Internet- und mobilgestützte Interventionen (IMIs) im Spannungsfeld von Autonomie und Patientenwohl	Rubeis, Giovanni; Ketteler, Daniel	2020	PPmP - Psychotherapie, Psychosomatik, Medizinische Psychologie	https://doi.org/10.1055/a-1104-5459
General Clinical Psychology and other Disorders	Therapeutenmerkmale und Therapieabbruch. Systematisches Review der letzten 20 Jahre	Gries, S.; Longley, M.; Kästner, D.; Gumz, A.	2020	Psychotherapeut	https://doi.org/10.1007/s00278-020-00454-6
General Clinical Psychology and other Disorders	Blended Interventions: Die Bedeutung menschlicher Unterstützung für die Adhärenzförderung. Ergebnisse einer Untersuchung im Rahmen der Multi-Center-Studie "Gesundbleiben Online"	Erbe, Doris	2019		http://nbn-resolving.de/urn:nbn:de:hbz:38-98611
General Clinical Psychology and other Disorders	Public-Health-Monitoring für die Altersgruppe 65+ in Deutschland - Auswahl und Definition von Indikatoren	Grube, Maike M.; Scheidt-Nave, Christa; Gaertner, Beate; Lüdtke, Denise; Bosnjak, Michael; Heinrich, Stephanie; Lahmann, Nils; Meyer, Gabriele; Rapp, Kilian; Riedel-Heller, Steffi; Schäufele, Martina; Wolf-Ostermann, Karin; Zank, Susanne; Fuchs, Judith	2019	Journal of Health Monitoring	https://doi.org/10.25646/5984
General Clinical Psychology and other Disorders	Assessing the unwanted: A systematic review of instruments used to assess negative effects of psychotherapy	Herzog, Philipp; Lauff, Sören; Rief, Winfried; Brakemeier, Eva-Lotta	2019	Brain and Behavior, 2019	https://doi.org/10.1002/brb3.1447
General Clinical Psychology and other Disorders	Effects of the therapist's statements on the patient's outcome and the therapeutic alliance: A systematic review	Kadur, Jennifer; Luedemann, Jonas; Andreas, Sylke	2020	Clinical Psychology and Psychotherapy	https://doi.org/10.1002/cpp.2416
General Clinical Psychology and other Disorders	Effectiveness of multidisciplinary psychiatric home treatment for elderly patients with mental illness: A systematic review of empirical studies	Klug, Guenter; Gallunder, Manuela; Hermann, Gerhard; Singer, Monika; Schulter, Günter	2019	BMC Psychiatry, 2019	https://doi.org/10.1186/s12888-019-2369-z
General Clinical Psychology and other Disorders	Adherence reporting in randomized controlled trials examining manualized multisession online interventions: Systematic review of practices and proposal for reporting standards	Beintner, Ina; Vollert, Bianka; Zarski, Anna-Carlotta; Bolinski, Felix; Musiat, Peter; Görlich, Dennis; Ebert, David Daniel; Jacobi, Corinna	2019	Journal of Medical Internet Research, 2019	https://doi.org/10.2196/14181
General Clinical Psychology and other Disorders	The efficacy of emotionally focused couples therapy and behavioral couples therapy: A meta-analysis	Rathgeber, Maren; Bürkner, Paul-Christian; Schiller, Eva-Maria; Holling, Heinz	2019	Journal of Marital and Family Therapy	https://doi.org/10.1111/jmft.12336
General Clinical Psychology and other Disorders	Psychosocial pretreatment predictors of weight control: A systematic review update	Carraca, Eliana V.; Santos, Inês; Mata, Jutta; Teixeira, Pedro J.	2018	Obesity Facts	https://doi.org/10.1159/000485838
General Clinical Psychology and other Disorders	Focused psychosocial interventions for children in low-resource humanitarian settings: A systematic review and individual participant data meta-analysis	Purgato, Marianna; Gross, Alden L.; Betancourt, Theresa; Bolton, Paul; Bonetto, Chiara; Gastaldon, Chiara; Gordon, James; O'Callaghan, Paul; Papola, Davide; Peltonen, Kirsi; Punamaki, Raija-Leena; Richards, Justin; Staples, Julie K.; Unterhitzenberger, Johanna; van Ommeren, Mark; de Jong, Joop; Jordans, Mark J. D.; Tol, Wietse A.; Barbui, Corrado	2018	The Lancet Global Health, 2018	https://doi.org/10.1111/add.14085
General Clinical Psychology and other Disorders	How often do general practitioners use placebos and non-specific interventions? Systematic review and meta-analysis of surveys	Linde, Klaus; Atmann, Oxana; Meissner, Karin; Schneider, Antonius; Meister, Ramona; Kriston, Levente; Werner, Christoph	2018	PLoS ONE, 2018	https://doi.org/10.1371/journal.pone.0202211
General Clinical Psychology and other Disorders	Kognitive Interventionen in Pflegeheimen. Systematische Übersicht der präventiven Wirksamkeit auf die kognitive Leistungsfähigkeit von Pflegebedürftigen	Wöhl, C.; Richter, S.; Blättner, B.	2018	Zeitschrift für Gerontologie und Geriatrie	https://doi.org/10.1007/s00391-017-1330-3
General Clinical Psychology and other Disorders	Bedeutung der Arbeitsallianz für die Psychotherapie. Bericht einer APA-Taskforce 2018	Flückiger, Christoph	2018	Zeitschrift für Klinische Psychologie und Psychotherapie	https://doi.org/10.1026/1616-3443/a000480
General Clinical Psychology and other Disorders	The alliance in adult psychotherapy: A meta-analytic synthesis	Flückiger, Christoph; Del Re, A. C.; Wampold, Bruce E.; Horvath, Adam O.	2018	Psychotherapy: Theory, Research, Practice, Training	https://doi.org/10.1037/pst0000172
General Clinical Psychology and other Disorders	Studien zur Wirksamkeit von klinischer Hypnose und Hypnotherapie im Jahr 2017	Hagl, Maria	2018	Hypnose	http://www.meg-stiftung.de/index.php?option=com_content&view=article&id=4&Itemid=3&lang=de
General Clinical Psychology and other Disorders	Association between insight and outcome of psychotherapy: Systematic review and meta-analysis	Jennissen, Simone; Huber, Julia; Ehrenthal, Johannes C.; Schauenburg, Henning; Dinger, Ulrike	2018	The American Journal of Psychiatry	https://doi.org/10.1176/appi.ajp.2018.17080847
General Clinical Psychology and other Disorders	A meta-analysis of the association between patients' early treatment outcome expectation and their posttreatment outcomes	Constantino, Michael J.; Vîsla, Andreea; Coyne, Alice E.; Boswell, James F.	2018	Psychotherapy: Theory, Research, Practice, Training	https://doi.org/10.1037/pst0000169
General Clinical Psychology and other Disorders	Collecting and delivering progress feedback: A meta-analysis of routine outcome monitoring	Lambert, Michael J.; Whipple, Jason L.; Kleinstäuber, Maria	2018	Psychotherapy: Theory, Research, Practice, Training	https://doi.org/10.1037/pst0000167
General Clinical Psychology and other Disorders	A meta-analysis of the association between patients' early perception of treatment credibility and their posttreatment outcomes	Constantino, Michael J.; Coyne, Alice E.; Boswell, James F.; Iles, Brittany R.; Vîsla, Andreea	2018	Psychotherapy: Theory, Research, Practice, Training	https://doi.org/10.1037/pst0000168
General Clinical Psychology and other Disorders	Implementierungsstand und Erfahrungen der Stakeholder mit der Zuhause-Behandlung in psychiatrischen Modellvorhaben (nach §64b SGB V) - Eine Mixed-Methods Untersuchung	Schwarz, Julian; Zeipert, Manfred; Ignatyev, Yuriy; Indefrey, Sonja; Rehr, Burkhard; Timm, Jürgen; Heinze, Martin; von Peter, Sebastian	2020	PPmP - Psychotherapie, Psychosomatik, Medizinische Psychologie	https://doi.org/10.1055/a-0942-2163
General Clinical Psychology and other Disorders	Non-pharmacological interventions for reducing mental distress in patients undergoing dental procedures: Systematic review and meta-analysis	Burghardt, Sophia; Koranyi, Susan; Magnucki, Gabriel; Strauss, Bernhard; Rosendahl, Jenny	2018	Journal of Dentistry	https://doi.org/10.1016/j.jdent.2017.11.005
General Clinical Psychology and other Disorders	Indikationen und Evidenz von international entwickelten Online-Coaches zur Intervention bei psychischen Erkrankungen - ein Meta-Review	Stein, Janine; Röhr, Susanne; Luck, Tobias; Löbner, Margrit; Riedel-Heller, Steffi G.	2018	Psychiatrische Praxis	https://doi.org/10.1055/s-0043-117050
General Clinical Psychology and other Disorders	In pursuit of truth: A critical examination of meta-analyses of cognitive behavior therapy	Wampold, Bruce E.; Flückiger, Christoph; Del Re, A. C.; Yulish, Noah E.; Frost, Nickolas D.; Pace, Brian T.; Goldberg, Simon B.; Miller, Scott D.; Baardseth, Timothy P.; Laska, Kevin M.; Hilsenroth, Mark J.	2019	Person	http://www.facultas.at/menu/verlag/Zeitschriften/PERSON
General Clinical Psychology and other Disorders	Additional effects of psychological interventions on subjective and objective outcomes compared with exercise-based cardiac rehabilitation alone in patients with cardiovascular disease: A systematic review and meta-analysis	Albus, Christian; Herrmann-Lingen, Christoph; Jensen, Katrin; Hackbusch, Matthes; Münch, Nina; Kuncewicz, Catharina; Grilli, Maurizio; Schwaab, Bernhard; Rauch, Bernhard	2019	European Journal of Preventive Cardiology	https://doi.org/10.1177/2047487319832393
General Clinical Psychology and other Disorders	Effectiveness of interventions to promote help-seeking for mental health problems: Systematic review and meta-analysis	Xu, Ziyan; Huang, Fangfang; Kösters, Markus; Staiger, Tobias; Becker, Thomas; Thornicroft, Graham; Rüsch, Nicolas	2018	Psychological Medicine	https://doi.org/10.1017/S0033291718001265
General Clinical Psychology and other Disorders	Effects of heart rate variability and mindfulness exercises on the therapeutic alliance: An investigation in outpatient training therapy	Blanck, Paul	2018
General Clinical Psychology and other Disorders	Die Allianz als Prädiktor für den Therapieerfolg internetbasierter Interventionen bei psychischen Störungen: Eine korrelative Metaanalyse	Probst, Greta Helene; Berger, Thomas; Flückiger, Christoph	2019	Verhaltenstherapie	https://doi.org/10.1159/000501565
General Clinical Psychology and other Disorders	Effects of dance movement therapy and dance on health-related psychological outcomes. A meta-analysis update	Koch, Sabine C.; Riege, Roxana F. F.; Tisborn, Katharina; Biondo, Jocelyn; Martin, Lily; Beelmann, Andreas	2019	Frontiers in Psychology, 2019	https://doi.org/10.3389/fpsyg.2019.01806
General Clinical Psychology and other Disorders	Internet- and mobile-based interventions for mental and somatic conditions in children and adolescents. A systematic review of meta-analyses	Domhardt, Matthias; Steubl, Lena; Baumeister, Harald	2020	Zeitschrift für Kinder- und Jugendpsychiatrie und Psychotherapie	https://doi.org/10.1024/1422-4917/a000625
General Social Psychology	Meta-analyses on the validity of verbal tools for credibility assessment	Oberlader, Verena	2019		http://nbn-resolving.de/urn:nbn:de:hbz:5-56794
General Social Psychology	Personality and prosocial behavior: A theoretical framework and meta-analysis	Thielmann, Isabel; Spadaro, Giuliana; Balliet, Daniel	2020	Psychological Bulletin	https://doi.org/10.1037/bul0000217
General Social Psychology	Exploring the association of social comparison with depression and anxiety: A systematic review and meta-analysis	McCarthy, Peter A.; Morina, Nexhmedin	2020	Clinical Psychology and Psychotherapy	https://doi.org/10.1002/cpp.2452
General Social Psychology	Systematic review and meta-analysis of self-serving attribution biases in the competitive context of organized sport	Allen, Mark S.; Robson, Davina A.; Martin, Luc J.; Laborde, Sylvain	2020	Personality and Social Psychology Bulletin	https://doi.org/10.1177/0146167219893995
General Social Psychology	Group flow: A scoping review of definitions, theoretical approaches, measures and findings	Pels, Fabian; Kleinert, Jens; Mennigen, Florian	2018	PLoS ONE, 2018	https://doi.org/10.1371/journal.pone.0210117
General Social Psychology	Neural correlates of social cognition in populations at risk of psychosis: A systematic review	Kozhuharova, P.; Saviola, F.; Ettinger, U.; Allen, P.	2020	Neuroscience and Biobehavioral Reviews	https://doi.org/10.1016/j.neubiorev.2019.10.010
General Social Psychology	Research in social psychology changed between 2011 and 2016: Larger sample sizes, more self-report measures, and more online studies	Sassenberg, Kai; Ditrich, Lara	2019	Advances in Methods and Practices in Psychological Science	https://doi.org/10.1177/2515245919838781
General Social Psychology	The psychology of morality: A review and analysis of empirical studies published from 1940 through 2017	Ellemers, Naomi; van der Toorn, Jojanneke; Paunov, Yavor; van Leeuwen, Thed	2019	Personality and Social Psychology Review	https://doi.org/10.1177/1088868318811759
General Social Psychology	Adults' dispositional and situational perspective-taking: A systematic review	Wolgast, Anett; Tandler, Nancy; Harrison, Laura; Umlauft, S<U+FFFD>ren	2020	Educational Psychology Review	https://doi.org/10.1007/s10648-019-09507-y
General Social Psychology	The vicious circle of social exclusion and psychopathology: A systematic review of experimental ostracism research in psychiatric disorders	Reinhard, Matthias A.; Dewald-Kaufmann, Julia; W<U+FFFD>stenberg, Torsten; Musil, Richard; Barton, Barbara B.; Jobst, Andrea; Padberg, Frank	2020	European Archives of Psychiatry and Clinical Neuroscience	https://doi.org/10.1007/s00406-019-01074-1
General Social Psychology	Individual consequences of age stereotypes on older workers. A systematic review	Weber, Jeannette; Angerer, Peter; M<U+FFFD>ller, Andreas	2019	Zeitschrift f<U+FFFD>r Gerontologie und Geriatrie, 2019	https://doi.org/10.1007/s00391-019-01506-6
General Social Psychology	Gender differences in the initiation of negotiations: A meta-analysis	Kugler, Katharina G.; Reif, Julia A. M.; Kaschner, Tamara; Brodbeck, Felix C.	2018	Psychological Bulletin	https://doi.org/10.1037/bul0000135
General Social Psychology	Surprise me! On the impact of unexpected benefits on other-praising gratitude expressions	Weiss, Alexa; Burgmer, Pascal; Lange, Jens	2020	Cognition and Emotion	https://doi.org/10.1080/02699931.2020.1797638
General Social Psychology	The social framework of individual decisions. 570+1 experiments in (un)ethical behavior	Gerlach, Philipp	2018		http://nbn-resolving.de/urn:nbn:de:kobv:11-110-18452/19438-7
General Social Psychology	Improving outgroup attitudes in schools: A meta-analytic review	<U+FFFD>lger, Zuhal; Dette-Hagenmeyer, Dorothea E.; Reichle, Barbara; Gaertner, Samuel L.	2018	Journal of School Psychology	https://doi.org/10.101641.jsp.2017.10.002
General Social Psychology	Reliability and perceived credibility of older eyewitnesses	Martschuk, Natalie	2019		http://nbn-resolving.de/urn:nbn:de:hebis:26-opus-147985
General Social Psychology	How do different ways of measuring individual differences in zero-acquaintance personality judgment accuracy correlate with each other?	Hall, Judith A.; Back, Mitja D.; Nestler, Steffen; Frauendorfer, Denise; Mast, Marianne Schmid; Ruben, Mollie A.	2018	Journal of Personality	https://doi.org/10.1111/jopy.12307
General Social Psychology	Automatic imitation: A meta-analysis	Cracco, Emiel; Bardi, Lara; Desmet, Charlotte; Genschow, Oliver; Rigoni, Davide; De Coster, Lize; Radkova, Ina; Deschrijver, Eliane; Brass, Marcel	2018	Psychological Bulletin	https://doi.org/10.1037/bul0000143
General Social Psychology	Computing the social brain connectome across systems and states	Alcal<U+FFFD>-L<U+FFFD>pez, Daniel; Smallwood, Jonathan; Jefferies, Elizabeth; Van Overwalle, Frank; Vogeley, Kai; Mars, Rogier B.; Turetsky, Bruce I.; Laird, Angela R.; Fox, Peter T.; Eickhoff, Simon B.; Bzdok, Danilo	2018	Cerebral Cortex	https://doi.org/10.1093/cercor/bhx121
General Social Psychology	Interpersonal accuracy in a political context is moderated by the extremity of one's political attitudes	Ivanov, Igor; Muller, Dominique; Delmas, Florian; W<U+FFFD>nke, Michaela	2018	Journal of Experimental Social Psychology	https://doi.org/10.1016/j.jesp.2018.07.001
General Social Psychology	Economic decisions for others are more favorable for close than distant clients	Ruessmann, Janna Katrin; Topolinski, Sascha	2020	Personality and Social Psychology Bulletin	https://doi.org/10.1177/0146167219858640
General Social Psychology	Has the evidence for moral licensing been inflated by publication bias?	Kuper, Niclas; Bott, Antonia	2019	Meta-Psychology, 2019	https://doi.org/10.17605/MP.2018.878
General Social Psychology	Cultural values moderate the impact of relative deprivation	Smith, Heather J.; Ryan, Desiree A.; Jaurique, Alexandria; Pettigrew, Thomas F.; Jetten, Jolanda; Ariyanto, Amarina; Autin, Fr<U+FFFD>d<U+FFFD>rique; Ayub, Nadia; Badea, Constantina; Besta, Tomasz; Butera, Fabrizio; Costa-Lopes, Rui; Cui, Lijuan; Fantini, Carole; Finchilescu, Gillian; Gaertner, Lowell; Gollwitzer, Mario; G<U+FFFD>mez, <U+FFFD>ngel; Gonz<U+FFFD>lez, Roberto; Hong, Ying Yi; H<U+FFF…	2018	Journal of Cross-Cultural Psychology	https://doi.org/10.1177/0022022118784213
General Social Psychology	The role of the anterior insula in social norm compliance and enforcement: Evidence from coordinate-based and functional connectivity meta-analyses	Bellucci, Gabriele; Feng, Chunliang; Camilleri, Julia; Eickhoff, Simon B.; Krueger, Frank	2018	Neuroscience and Biobehavioral Reviews	https://doi.org/10.1016/j.neubiorev.2018.06.024
General Social Psychology	The stability and change of loneliness across the life span: A meta-analysis of longitudinal studies	Mund, Marcus; Freuding, Maren M.; M<U+FFFD>bius, Kathrin; Horn, Nicole; Neyer, Franz J.	2020	Personality and Social Psychology Review	https://doi.org/10.1177/1088868319850738
General Social Psychology	Teachers' implicit attitudes toward students from different social groups: A meta-analysis	Pit-ten Cate, Ineke M.; Glock, Sabine	2019	Frontiers in Psychology, 2019	https://doi.org/10.3389/fpsyg.2019.02832
General Social Psychology	Meta-analytic evidence for ambivalence resolution as a key process in effortless self-control	Schneider, Iris K.; Gillebaart, Marleen; Mattes, Andr<U+FFFD>	2019	Journal of Experimental Social Psychology, 2019	https://doi.org/10.1016/j.jesp.2019.103846
General Social Psychology	Die Kontakthypothese	St<U+FFFD>rmer, Stefan; Kauff, Mathias	2020
General Social Psychology	Entwicklungspsychologische Grundlagen f<U+FFFD>r die Entstehung von Vorurteilen	Beelmann, Andreas; Neudecker, Clara	2020
General Social Psychology	Abstract thinking increases support for affirmative action	Fleischmann, Alexandra; Burgmer, Pascal	2020	Sex Roles	https://doi.org/10.1007/s11199-019-01068-2
General Social Psychology	The latent structure of interpersonal problems: Validity of dimensional, categorical, and hybrid models	Wendt, Leon P.; Wright, Aidan G. C.; Pilkonis, Paul A.; Nolte, Tobias; Fonagy, Peter; Montague, P. Read; Benecke, Cord; Krieger, Tobias; Zimmermann, Johannes	2019	Journal of Abnormal Psychology	https://doi.org/10.1037/abn0000460
General Social Psychology	Acute hunger does not always undermine prosociality	H<U+FFFD>usser, Jan A.; Stahlecker, Christina; Mojzisch, Andreas; Leder, Johannes; Van Lange, Paul A. M.; Faber, Nadira S.	2019	Nature Communications, 2019	https://doi.org/10.1038/s41467-019-12579-7
General Social Psychology	Norms across cultures: A cross-cultural meta-analysis of norms effects in the theory of planned behavior	Fischer, Ronald; Karl, Johannes Alfons; Fischer, Moritz Valentin	2019	Journal of Cross-Cultural Psychology	https://doi.org/10.1177/0022022119846409
General Social Psychology	The association between weight stigma and mental health: A meta-analysis	Emmer, Christine; Bosnjak, Michael; Mata, Jutta	2020	Obesity Reviews, 2020	https://doi.org/10.1111/obr.12935
General Social Psychology	Unpacking the boxes we put people in - On the symmetry, contextual malleability, and maintenance of social categorization	Flade, Felicitas	2020		https://doi.org/10.25358/openscience-5103
General Social Psychology	A meta-analysis of the relationship between emotion recognition ability and intelligence	Schlegel, Katja; Palese, Tristan; Mast, Marianne Schmid; Rammsayer, Thomas H.; Hall, Judith A.; Murphy, Nora A.	2020	Cognition and Emotion	https://doi.org/10.1080/02699931.2019.1632801
General Social Psychology	Attentional bias toward and distractibility by sexual cues: A meta-analytic integration	Strahler, J.; Baranowski, A. M.; Walter, B.; Huebner, N.; Stark, R.	2019	Neuroscience and Biobehavioral Reviews	https://doi.org/10.1016/j.neubiorev.2019.07.015
Health Psychology	A meta-analysis of the effectiveness of randomized controlled positive psychological interventions on subjective and psychological well-being	Koydemir, Selda; S<U+FFFD>kmez, Asli Bugay; Schuetz, Astrid	2020	Applied Research in Quality of Life	https://doi.org/10.1007/s11482-019-09788-z
Health Psychology	Optimism and the experience of pain: A systematic review	Basten-G<U+FFFD>nther, Johanna; Peters, Madelon; Lautenbacher, Stefan	2019	Behavioral Medicine	https://doi.org/10.1080/08964289.2018.1517242
Health Psychology	Systematic review and meta-analysis of correlates of FFMQ mindfulness facets	Mattes, Josef	2019	Frontiers in Psychology, 2019	https://doi.org/10.3389/fpsyg.2019.02684
Health Psychology	Laboratory-based interventions targeting food craving: A systematic review and meta-analysis	Wolz, Ines; Nannt, Julia; Svaldi, Jennifer	2020	Obesity Reviews, 2020	https://doi.org/10.1111/obr.12996
Health Psychology	Sedentary behaviors and anxiety among children, adolescents and adults: A systematic review and meta-analysis	Stanczykiewicz, Bartlomiej; Banik, Anna; Knoll, Nina; Keller, Jan; Hohl, Diana Hilda; Rosi?czuk, Joanna; Luszczynska, Aleksandra	2019	BMC Public Health, 2019	https://doi.org/10.1186/s12889-019-6715-3
Health Psychology	Impact of health warning labels on selection and consumption of food and alcohol products: Systematic review with meta-analysis	Clarke, Natasha; Pechey, Emily; Kosite, Daina; K<U+FFFD>nig, Laura M.; Mantzari, Eleni; Blackwell, Anna K. M.; Marteau, Theresa M.; Hollands, Gareth J.	2020	Health Psychology Review	https://doi.org/10.1080/17437199.2020.1780147
Health Psychology	Stress management interventions for college students: A systematic review and meta-analysis	Amanvermez, Yagmur; Rahmadiana, Metta; Karyotaki, Eirini; de Wit, Leonore; Ebert, David D.; Kessler, Ronald C.; Cuijpers, Pim	2020	Clinical Psychology - Science and Practice	https://doi.org/10.1111/cpsp.12342
Health Psychology	The effectiveness of app-based mobile interventions on nutrition behaviours and nutrition-related health outcomes: A systematic review and meta-analysis	Villinger, Karoline; Wahl, Deborah R.; Boeing, Heiner; Schupp, Harald T.; Renner, Britta	2019	Obesity Reviews	https://doi.org/10.1111/obr.12903
Health Psychology	Prevention of eating disorders at universities: A systematic review and meta-analysis	Harrer, Mathias; Adam, Sophia H.; Messner, Eva-Maria; Baumeister, Harald; Cuijpers, Pim; Bruffaerts, Ronny; Auerbach, Randy P.; Kessler, Ronald C.; Jacobi, Corinna; Taylor, Craig Barr; Ebert, David D.	2020	International Journal of Eating Disorders	https://doi.org/10.1002/eat.23224
Health Psychology	A systematic review and meta-analysis of the impact of mindfulness-based interventions on the well-being of healthcare professionals	Lomas, Tim; Carles Medina, Joan; Ivtzan, Itai; Rupprecht, Silke; Eiroa-Orosa, Francisco Jos<U+FFFD>	2019	Mindfulness	https://doi.org/10.1007/s12671-018-1062-5
Health Psychology	Psychosocial interventions targeting mental health in pregnant adolescents and adolescent parents: A systematic review	Laurenzi, Christina A.; Gordon, Sarah; Abrahams, Nina; du Toit, Stefani; Bradshaw, Melissa; Brand, Amanda; Melendez-Torres, G. J.; Tomlinson, Mark; Ross, David A.; Servili, Chiara; Carvajal-Aguirre, Liliana; Lai, Joanna; Dua, Tarun; Fleischmann, Alexandra; Skeen, Sarah	2020	Reproductive Health, 2020	https://doi.org/10.1186/s12978-020-00913-y
Health Psychology	Positive psychological coaching definitions and models: A systematic literature review	van Zyl, Llewellyn E.; Roll, Lara C.; Stander, Marius W.; Richter, Stefanie	2020	Frontiers in Psychology, 2020	https://doi.org/10.3389/fpsyg.2020.00793
Health Psychology	Psychological interventions to foster resilience in healthcare students	Kunzler, Angela M.; Helmreich, Isabella; K<U+FFFD>nig, Jochem; Chmitorz, Andrea; Wessa, Mich<U+FFFD>le; Binder, Harald; Lieb, Klaus	2020	Cochrane Database of Systematic Reviews, 2020	https://doi.org/10.1002/14651858.CD013684
Health Psychology	Psychological interventions targeting partners of cancer patients: A systematic review	Kleine, Anne-Kathrin; Hallensleben, Nina; Mehnert, Anja; H<U+FFFD>nig, Klaus; Ernst, Jochen	2019	Critical Reviews in Oncology/Hematology	https://doi.org/10.1016/j.critrevonc.2019.05.008
Health Psychology	A systematic umbrella review on the epidemiology of modifiable health influencing factors and on health promoting interventions among university students	Dietz, Pavel; Reichel, Jennifer L.; Edelmann, Dennis; Werner, Antonia M.; Tibubos, Ana Nanette; Sch<U+FFFD>fer, Markus; Simon, Perikles; Letzel, Stephan; Pfirrmann, Daniel	2020	Frontiers in Public Health, 2020	https://doi.org/10.3389/fpubh.2020.00137
Health Psychology	Evaluating reach, adoption, implementation and maintenance of internet-based interventions to prevent eating disorders in adolescents: A systematic review	Zeiler, Michael; Kuso, Stefanie; Nacke, Barbara; Klesges, Lisa M.; Waldherr, Karin	2020	European Journal of Public Health	https://doi.org/10.1093/eurpub/ckz130
Health Psychology	Automatic affective reactions to exercise-related stimuli. Towards a better understanding of exercise motivation	Schinkoeth, Michaela	2020		https://doi.org/10.25932/publishup-47111
Health Psychology	Health literacy in persons at risk of and patients with coronary heart disease: A systematic review	Peltzer, Samia; Hellstern, Marc; Genske, Anna; J<U+FFFD>nger, Saskia; Woopen, Christiane; Albus, Christian	2020	Social Science & Medicine, 2020	https://doi.org/10.1016/j.socscimed.2019.112711
Health Psychology	Health literacy in individuals at risk for Alzheimer's dementia: A systematic review	Rostamzadeh, Ayda; Stapels, J.; Genske, A.; Haidl, T.; J<U+FFFD>nger, S.; Seves, M.; Woopen, C.; Jessen, F.	2020	The Journal of Prevention of Alzheimer's Disease	https://doi.org/10.14283/jpad.2019.34
Health Psychology	Controlling for placebo effects in computerized cognitive training studies with healthy older adults from 2016-2018: Systematic review	Masurovsky, Alexander	2020	JMIR Serious Games, 2020	https://doi.org/10.2196/14030
Health Psychology	Moderators of psychological and psychoeducational interventions for the prevention of depression: A systematic review	Conejo-Cer<U+FFFD>n, Sonia; <U+FFFD>ngel Bell<U+FFFD>n, Juan; Motrico, Emma; Campos-Pa<U+FFFD>no, Henar; Mart<U+FFFD>n-G<U+FFFD>mez, Carmen; Ebert, David D.; Buntrock, Claudia; Gili, Margalida; Moreno-Peral, Patricia	2020	Clinical Psychology Review, 2020	https://doi.org/10.1016/j.cpr.2020.101859
Health Psychology	The effects of workplace nature-based interventions on the mental health and well-being of employees: A systematic review	Gritzka, Susan; MacIntyre, Tadhg E.; D<U+FFFD>rfel, Denise; Baker-Blanc, Jordan L.; Calogiuri, Giovanna	2020	Frontiers in Psychiatry, 2020	https://doi.org/10.3389/fpsyt.2020.00323
Health Psychology	Changing behaviour in pregnant women: A scoping review	Zinsser, Laura A.; Stoll, Kathrin; Wieber, Frank; Pehlke-Milde, Jessica; Gross, Mechthild M.	2020	Midwifery, 2020	https://doi.org/10.1016/j.midw.2020.102680
Health Psychology	Theoretical underpinnings of interventions that effectively promote physical activity in adult men. Systematic review and qualitative content analysis	Strobl, Helmut	2020	German Journal of Exercise and Sport Research	https://doi.org/10.1007/s12662-019-00631-z
Health Psychology	Conventional weight loss interventions across the different BMI obesity classes: A systematic review and quantitative comparative analysis	Bauer, Kerstin; Lau, Teresa; Schwille-Kiuntke, Juliane; Schild, Sandra; Hauner, Hans; Stengel, Andreas; Zipfel, Stephan; Mack, Isabelle	2020	European Eating Disorders Review	https://doi.org/10.1002/erv.2741
Health Psychology	Cognitive plasticity in healthy older adults: Effects of nonpharmacological interventions and predictors of intervention success	Roheger, Mandy	2019		http://nbn-resolving.de/urn:nbn:de:hbz:38-105126
Health Psychology	Restricted speech recognition in noise and quality of life of hearing-impaired children and adolescents with cochlear implants - Need for studies addressing this topic with valid pediatric quality of life instruments	Huber, Maria; Havas, Clara	2019	Frontiers in Psychology, 2019	https://doi.org/10.3389/fpsyg.2019.02085
Health Psychology	The role of alcohol use and drinking patterns in socioeconomic inequalities in mortality: A systematic review	Probst, Charlotte; Kilian, Carolin; Sanchez, Sherald; Lange, Shannon; Rehm, J<U+FFFD>rgen	2020	The Lancet Public Health, 2020	https://doi.org/10.1146/annurev-clinpsy-071519-020546
Health Psychology	The concept and components of engagement in different domains applied to eHealth: A systematic scoping review	Kelders, Saskia M.; van Zyl, Llewellyn Ellardus; Ludden, Geke D. S.	2020	Frontiers in Psychology, 2020	https://doi.org/10.3389/fpsyg.2020.00926
Health Psychology	Efficacy: Pr<U+FFFD>vention psychischer St<U+FFFD>rungen und F<U+FFFD>rderung psychischer Gesundheit: Eine Meta-Meta-Analyse	R<U+FFFD>hrle, Bernd; Christiansen, Hanna	2018
Health Psychology	Emotion differentiation dissected: Between-category, within-category, and integral emotion differentiation, and their relation to well-being	Erbas, Yasemin; Ceulemans, Eva; Blanke, Elisabeth S.; Sels, Laura; Fischer, Agneta; Kuppens, Peter	2019	Cognition and Emotion	https://doi.org/10.1080/02699931.2018.1465894
Health Psychology	The relationship between working alliance and client outcomes in coaching: A meta-analysis	Gra<U+FFFD>mann, Carolin; Sch<U+FFFD>lmerich, Franziska; Schermuly, Carsten C.	2020	Human Relations	https://doi.org/10.1177/0018726718819725
Health Psychology	Psychological effects of meditation for healthy practitioners: An update	Sedlmeier, Peter; Lo<U+FFFD>e, Caroline; Quasten, Lisa Christin	2018	Mindfulness	https://doi.org/10.1007/s12671-017-0780-4
Health Psychology	Preventing depression in the offspring of parents with depression: A systematic review and meta-analysis of randomized controlled trials	Loechner, Johanna; Starman, Kornelija; Galuschka, Katharina; Tamm, Jeanette; Schulte-K<U+FFFD>rne, Gerd; Rubel, Julian; Platt, Belinda	2018	Clinical Psychology Review	https://doi.org/10.1016/j.cpr.2017.11.009
Health Psychology	Targeting procrastination using psychological treatments: A systematic review and meta-analysis	Rozental, Alexander; Bennett, Sophie; Forsstr<U+FFFD>m, David; Ebert, David D.; Shafran, Roz; Andersson, Gerhard; Carlbring, Per	2018	Frontiers in Psychology, 2018	https://doi.org/10.3389/fpsyg.2018.01588
Health Psychology	Quality matters: A meta-analysis on components of healthy family meals	Dallacker, Mattea; Hertwig, Ralph; Mata, Jutta	2019	Psychology and Health	https://doi.org/10.1037/hea0000801
Health Psychology	Mindfulness-based interventions in the workplace: An inclusive systematic review and meta-analysis of their impact upon wellbeing	Lomas, Tim; Medina, Juan Carlos; Ivtzan, Itai; Rupprecht, Silke; Eiroa-Orosa, Francisco Jos<U+FFFD>	2019	Journal of Positive Psychology	https://doi.org/10.1080/17439760.2018.1519588
Health Psychology	Well-being and health-related interventions in small- and medium-sized enterprises: A meta-analytic review	Gerhardt, Christin; Stocker, D<U+FFFD>sir<U+FFFD>e; Looser, Dominik; grosse Holtforth, Martin; Elfering, Achim	2019	Zeitschrift f<U+FFFD>r Arbeitswissenschaft	https://doi.org/10.1007/s41449-019-00154-1
Health Psychology	A meta-analysis of the health action process approach	Zhang, Chun-Qing; Zhang, Ru; Schwarzer, Ralf; Hagger, Martin S.	2019	Health Psychology	https://doi.org/10.1037/hea0000728
Health Psychology	Religiosit<U+FFFD>t/Spiritualit<U+FFFD>t und psychische Gesundheit: Zentrale Ergebnisse einer Metaanalyse <U+FFFD>ber Studien aus dem deutschsprachigen Raum	Zwingmann, Christian; Hodapp, Bastian	2018	Spiritual Care	https://doi.org/10.1515/spircare-2017-0019
Health Psychology	Internet interventions for mental health in university students: A systematic review and meta-analysis	Harrer, Mathias; Adam, Sophia H.; Baumeister, Harald; Cuijpers, Pim; Karyotaki, Eirini; Auerbach, Randy P.; Kessler, Ronald C.; Bruffaerts, Ronny; Berking, Matthias; Ebert, David D.	2019	International Journal of Methods in Psychiatric Research, 2019	https://doi.org/10.1002/mpr.1759
Health Psychology	Psychological resilience during the perimenopause	S<U+FFFD>ss, Hannah; Ehlert, Ulrike	2020	Maturitas	https://doi.org/10.1016/j.maturitas.2019.10.015
Health Psychology	The resilient emotional brain: A scoping review of the medial prefrontal cortex and limbic structure and function in resilient adults with a history of childhood maltreatment	Moreno-L<U+FFFD>pez, Laura; Ioannidis, Konstantinos; Askelund, Adrian Dahl; Smith, Alicia J.; Schueler, Katja; Van Harmelen, Anne-Laura	2020	Biological Psychiatry: Cognitive Neuroscience and Neuroimaging	https://doi.org/10.1016/j.bpsc.2019.12.008
Health Psychology	Psychological interventions to foster resilience in healthcare professionals	Kunzler, Angela M.; Helmreich, Isabella; Chmitorz, Andrea; K<U+FFFD>nig, Jochem; Binder, Harald; Wessa, Mich<U+FFFD>le; Lieb, Klaus	2020	Cochrane Database of Systematic Reviews, 2020	https://doi.org/10.1002/14551858.CD012527.pub2
Health Psychology	From fragments to identity: Reminiscence, life review and well-being of holocaust survivors. An integrative review	Zimmermann, Sarah; Forstmeier, Simon	2020	Aging & Mental Health	https://doi.org/10.1080/13607863.2018.1525608
Health Psychology	Psychische Belastungen, Resilienz, Risiko- und protektive Faktoren w<U+FFFD>hrend der SARS-CoV-2-Pandemie. Systematische Literaturanalyse und Studienergebnisse aus dem deutschen COSMO-Panel	Gilan, Donya; R<U+FFFD>thke, Nikolaus; Blessin, Manpreet; Kunzler, Angela; Stoffers-Winterling, Jutta; M<U+FFFD>ssig, Markus; Yuen, Kenneth S. L.; T<U+FFFD>scher, Oliver; Thrul, Johannes; Kreuter, Frauke; Sprengholz, Philipp; Betsch, Cornelia; Stieglitz, Rolf Dieter; Lieb, Klaus	2020	Deutsches <U+FFFD>rzteblatt	https://doi.org/10.3238/arztebl.2020.0625
Health Psychology	Zusammenhang von Resilienz und psychischer Gesundheit bei k<U+FFFD>rperlichen Erkrankungen. Systematisches Review und Metaanalyse	F<U+FFFD>rber, Francesca; Rosendahl, Jenny	2018	Deutsches <U+FFFD>rzteblatt	https://www.aerzteblatt.de/
Industrial and Organizational Psychology & Consumer Psychology	Leadership behaviour and leader self-reported well-being: A review, integration and meta-analytic examination	Kaluza, Antonia J.; Boer, Diana; Buengeler, Claudia; van Dick, Rolf	2020	Work & Stress	https://doi.org/10.1080/02678373.2019.1617369
Industrial and Organizational Psychology & Consumer Psychology	How effective is teamwork really? The relationship between teamwork and performance in healthcare teams: A systematic review and meta-analysis	Schmutz, Jan B.; Meier, Laurenz L.; Manser, Tanja	2019	BMJ Open, 2019	https://doi.org/10.1136/bmjopen-2018-028280
Industrial and Organizational Psychology & Consumer Psychology	Psychosocial areas of worklife and chronic low back pain: A systematic review and meta-analysis	Buruck, Gabriele; Tomaschek, Anne; Wendsche, Johannes; Ochsmann, Elke; D<U+FFFD>rfel, Denise	2019	BMC Musculoskeletal Disorders, 2019	https://doi.org/10.1186/s12891-019-2826-3
Industrial and Organizational Psychology & Consumer Psychology	Career preparedness among adolescents: A review of key components and directions for future research	Marciniak, Julian; Johnston, Claire S.; Steiner, Rebekka S.; Hirschi, Andreas	2020	Journal of Career Development	https://doi.org/10.1177/0894845320943951
Industrial and Organizational Psychology & Consumer Psychology	Job satisfaction and mental health of temporary agency workers in Europe: A systematic review and research agenda	H<U+FFFD>nefeld, Lena; Gerstenberg, Susanne; H<U+FFFD>ffmeier, Joachim	2020	Work & Stress	https://doi.org/10.1080/02678373.2019.1567619
Industrial and Organizational Psychology & Consumer Psychology	Digitalisierung und Psyche - Rahmenbedingungen f<U+FFFD>r eine gesunde Arbeitswelt. Ergebnisse des Projektes GAP	Bretschneider, Maximilian; Dr<U+FFFD>ssler, Stephanie; Magister, Selina; Zeiser, Maria; K<U+FFFD>mpf, Daniel; Seidler, Andreas	2020	Zeitschrift f<U+FFFD>r Arbeitswissenschaft	https://doi.org/10.1007/s41449-020-00206-x
Industrial and Organizational Psychology & Consumer Psychology	Latent profile analysis: A review and "how to" guide of its application within vocational behavior research	Spurk, Daniel; Hirschi, Andreas; Wang, Mo; Valero, Domingo; Kauffeld, Simone	2020	Journal of Vocational Behavior, 2020	https://doi.org/10.1016/j.jvb.2020.103445
Industrial and Organizational Psychology & Consumer Psychology	The effects of workplace nature-based interventions on the mental health and well-being of employees: A systematic review	Gritzka, Susan; MacIntyre, Tadhg E.; D<U+FFFD>rfel, Denise; Baker-Blanc, Jordan L.; Calogiuri, Giovanna	2020	Frontiers in Psychiatry, 2020	https://doi.org/10.3389/fpsyt.2020.00323
Industrial and Organizational Psychology & Consumer Psychology	Meta-analysis in vocational behavior: A systematic review and recommendations for best practices	Rudolph, Cort W.; Chang, Caelen K.; Rauvola, Rachel S.; Zacher, Hannes	2020	Journal of Vocational Behavior, 2020	https://doi.org/10.1016/j.jvb.2020.103397
Industrial and Organizational Psychology & Consumer Psychology	Differential work design for different age groups? . A systematic literature review of the moderating role of age in the relationship between psychosocial work characteristics and health	M<U+FFFD>hlenbrock, Inga; H<U+FFFD>ffmeier, Joachim	2020	Zeitschrift f<U+FFFD>r Arbeits- und Organisationspsychologie	https://doi.org/10.1026/0932-4089/a000330
Industrial and Organizational Psychology & Consumer Psychology	Interactive effects of team virtuality and work design on team functioning	Handke, Lisa; Klonek, Florian E.; Parker, Sharon K.; Kauffeld, Simone	2020	Small Group Research	https://doi.org/10.1177/1046496419863490
Industrial and Organizational Psychology & Consumer Psychology	Patientenzentrierte Gestaltung von Organisationsstrukturen und -prozessen in Versorgungseinrichtungen. Am Beispiel des Entlassungsprozesses in Brustzentren und der Methode Value Stream Mapping	Beckmann, Marina	2020		http://nbn-resolving.de/urn:nbn:de:hbz:38-107150
Industrial and Organizational Psychology & Consumer Psychology	Digital competencies: A review of the literature and applications in the workplace	Oberl<U+FFFD>nder, Maren; Beinicke, Andrea; Bipp, Tanja	2020	Computers & Education, 2020	https://doi.org/10.1016/j.compedu.2019.103752
Industrial and Organizational Psychology & Consumer Psychology	A systematic review and critique of research on "healthy leadership"	Rudolph, Cort W.; Murphy, Lauren D.; Zacher, Hannes	2020	The Leadership Quarterly, 2020	https://doi.org/10.1016/j.leaqua.2019.101335
Industrial and Organizational Psychology & Consumer Psychology	Occupational commitment from a life span perspective. An integrative review and a research outlook	Spurk, Daniel; Hofer, Annabelle; Burmeister, Anne; Muehlhausen, Julia; Volmer, Judith	2019	Career Development International	https://doi.org/10.1108/CDI-07-2018-0184
Industrial and Organizational Psychology & Consumer Psychology	Antecedents and outcomes of objective versus subjective career success: Competing perspectives and future directions	Spurk, Daniel; Hirschi, Andreas; Dries, Nicky	2019	Journal of Management	https://doi.org/10.1177/0149206318786563
Industrial and Organizational Psychology & Consumer Psychology	Contextual undertow of workplace deviance by and within units: A systematic review	G<U+FFFD>tz, Martin; Bollmann, Gr<U+FFFD>goire; O'Boyle, Ernest H.	2019	Small Group Research	https://doi.org/10.1177/1046496418790044
Industrial and Organizational Psychology & Consumer Psychology	Interpersonal aspects of leadership and implications for health and well-being	Wirtz, Nina	2018		https://doi.org/10.25358/openscience-2170
Industrial and Organizational Psychology & Consumer Psychology	Academic career development: A review and research agenda	Zacher, Hannes; Rudolph, Cort W.; Todorovic, Tara; Ammann, Daniel	2019	Journal of Vocational Behavior	https://doi.org/10.1016/j.jvb.2018.08.006
Industrial and Organizational Psychology & Consumer Psychology	Verstehen, was Teams erfolgreich und zufrieden macht. Entwicklung und Validierung eines Modells zur erfolgreichen Zusammenarbeit in Teams in dynamischen Umwelten	Bleiker, Marco; Wallemann, Alexandra; M<U+FFFD>ller, Patrick	2020	Wirtschaftspsychologie, 2020-2021	http://www.psychologie-aktuell.com/index.php?id=wirtschaftspsychologie
Industrial and Organizational Psychology & Consumer Psychology	Krank zur Arbeit - und das ist auch gut so?! Positive Effekte von Pr<U+FFFD>sentismus	R<U+FFFD>ser, Florian; Lohaus, Daniela	2020	Wirtschaftspsychologie, 2020-2021	http://www.psychologie-aktuell.com/index.php?id=wirtschaftspsychologie
Industrial and Organizational Psychology & Consumer Psychology	Arbeitszeitgestaltung in der digitalisierten Arbeitswelt: Ein systematisches Literatur Review zur Wirkung von Arbeitszeitverk<U+FFFD>rzung in Bezug auf die psychische Gesundheit	Jansen-Preilowski, Virgilia V.; Paruzel, Agnieszka; Maier, G<U+FFFD>nter W.	2020	Gruppe. Interaktion. Organisation. Zeitschrift f<U+FFFD>r Angewandte Organisationspsychologie	https://doi.org/10.1007/s11612-020-00530-0
Industrial and Organizational Psychology & Consumer Psychology	Individual consequences of age stereotypes on older workers. A systematic review	Weber, Jeannette; Angerer, Peter; M<U+FFFD>ller, Andreas	2019	Zeitschrift f<U+FFFD>r Gerontologie und Geriatrie, 2019	https://doi.org/10.1007/s00391-019-01506-6
Industrial and Organizational Psychology & Consumer Psychology	Zusammenhang zwischen beruflichen Traumata, posttraumatischer Belastungsst<U+FFFD>rung und Depression - eine Beurteilung von systematischen Reviews	Bolm-Audorff, Ulrich; Petereit-Haack, Gabriela; Seidler, Andreas	2019	Psychiatrische Praxis	https://doi.org/10.1055/a-0822-7712
Industrial and Organizational Psychology & Consumer Psychology	Occupational future time perspective: A meta-analysis of antecedents and outcomes	Rudolph, Cort W.; Kooij, Dorien T. A. M.; Rauvola, Rachel S.; Zacher, Hannes	2018	Journal of Organizational Behavior	https://doi.org/10.1002/job.2264
Industrial and Organizational Psychology & Consumer Psychology	Who networks? - A meta-analysis of networking and personality	Bendella, Hadjira; Wolff, Hans-Georg	2020	Career Development International	https://doi.org/10.1108/CDI-12-2019-0289
Industrial and Organizational Psychology & Consumer Psychology	The relationship between working alliance and client outcomes in coaching: A meta-analysis	Gra<U+FFFD>mann, Carolin; Sch<U+FFFD>lmerich, Franziska; Schermuly, Carsten C.	2020	Human Relations	https://doi.org/10.1177/0018726718819725
Industrial and Organizational Psychology & Consumer Psychology	Age and career commitment: Meta-analytic tests of competing linear versus curvilinear relationships	Katz, Ian M.; Rudolph, Cort W.; Zacher, Hannes	2019	Journal of Vocational Behavior	https://doi.org/10.1016/j.jvb.2019.03.001
Industrial and Organizational Psychology & Consumer Psychology	Recent experiences with tariffs for saving electricity in households	Prasanna, Ashreeta; Mahmoodi, Jasmin; Brosch, Tobias; Patel, Martin K.	2018	Energy Policy	https://doi.org/10.1016/j.enpol.2018.01.044
Industrial and Organizational Psychology & Consumer Psychology	The drivers of work engagement: A meta-analytic review of longitudinal evidence	Lesener, Tino; Gusy, Burkhard; Jochmann, Anna; Wolter, Christine	2020	Work & Stress	https://doi.org/10.1080/02678373.2019.1686440
Industrial and Organizational Psychology & Consumer Psychology	Culture, burnout, and engagement: A meta-analysis on national cultural values as moderators in JD-R theory	Rattrie, Lucy T.B.; Kittler, Markus G.; Paul, Karsten I.	2019	Applied Psychology: An International Review	https://doi.org/10.1111/apps.12209
Industrial and Organizational Psychology & Consumer Psychology	Mindfulness-based interventions in the workplace: An inclusive systematic review and meta-analysis of their impact upon wellbeing	Lomas, Tim; Medina, Juan Carlos; Ivtzan, Itai; Rupprecht, Silke; Eiroa-Orosa, Francisco Jos<U+FFFD>	2019	Journal of Positive Psychology	https://doi.org/10.1080/17439760.2018.1519588
Industrial and Organizational Psychology & Consumer Psychology	Well-being and health-related interventions in small- and medium-sized enterprises: A meta-analytic review	Gerhardt, Christin; Stocker, D<U+FFFD>sir<U+FFFD>e; Looser, Dominik; grosse Holtforth, Martin; Elfering, Achim	2019	Zeitschrift f<U+FFFD>r Arbeitswissenschaft	https://doi.org/10.1007/s41449-019-00154-1
Industrial and Organizational Psychology & Consumer Psychology	Aging in a digital world - Attitudes and behaviors towards technology use across the life-span	Hauk, Nathalie	2018		https://doi.org/10.17169/refubium-793
Industrial and Organizational Psychology & Consumer Psychology	Mindfulness-based programs in the workplace: A meta-analysis of randomized controlled trials	Vonderlin, Ruben; Biermann, Miriam; Bohus, Martin; Lyssenko, Lisa	2020	Mindfulness	https://doi.org/10.1007/s12671-020-01328-3
Industrial and Organizational Psychology & Consumer Psychology	Tapping the power of employee perceptions: Development and validation of a sound structural measurement model for employee surveys	Matthaei, Bj<U+FFFD>rn Dominik	2019		http://nbn-resolving.de/urn:nbn:de:bvb:19-238943
Industrial and Organizational Psychology & Consumer Psychology	Effectiveness of interventions to promote help-seeking for mental health problems: Systematic review and meta-analysis	Xu, Ziyan; Huang, Fangfang; K<U+FFFD>sters, Markus; Staiger, Tobias; Becker, Thomas; Thornicroft, Graham; R<U+FFFD>sch, Nicolas	2018	Psychological Medicine	https://doi.org/10.1017/S0033291718001265
Industrial and Organizational Psychology & Consumer Psychology	Kontextsensitive Assistenzsysteme und <U+FFFD>berwachung am Arbeitsplatz: Ein meta-analytisches Review zur Auswirkung elektronischer <U+FFFD>berwachung auf Besch<U+FFFD>ftigte	Backhaus, Nils	2019	Zeitschrift f<U+FFFD>r Arbeitswissenschaft	https://doi.org/10.1007/s41449-018-00140-z
Industrial and Organizational Psychology & Consumer Psychology	Psychological research on organisational democracy: A meta-analysis of individual, organisational, and societal outcomes	Weber, Wolfgang G.; Unterrainer, Christine; H<U+FFFD>ge, Thomas	2020	Applied Psychology: An International Review	https://doi.org/10.1111/apps.12205
Industrial and Organizational Psychology & Consumer Psychology	A meta-analysis on promotion- and prevention-focused job crafting	Lichtenthaler, Philipp W.; Fischbach, Andrea	2019	European Journal of Work and Organizational Psychology	https://doi.org/10.1080/1359432X.2018.1527767
Industrial and Organizational Psychology & Consumer Psychology	The Instrument for Stress-Oriented Task Analysis (ISTA). A meta-analysis	Irmer, Julien Patrick; Kern, Marcel; Schermelleh-Engel, Karin; Semmer, Norbert K.; Zapf, Dieter	2019	Zeitschrift f<U+FFFD>r Arbeits- und Organisationspsychologie	https://doi.org/10.1026/0932-4089/a000312
Industrial and Organizational Psychology & Consumer Psychology	Mindfulness and sustainability: Correlation or causation?	Geiger, Sonja M.; Grossman, Paul; Schrader, Ulf	2019	Current Opinion in Psychology	https://doi.org/10.1016/j.copsyc.2018.09.010
Personality Psychology	Humor styles and personality: A systematic review and meta-analysis on the relations between humor styles and the Big Five personality traits	Plessen, Constantin Y.; Franken, Fabian R.; Ster, Christoph; Schmid, Rebecca R.; Wolfmayr, Christoph; Mayer, Anna-Maria; Sobisch, Marc; Kathofer, Maximilian; Rattner, Katrin; Kotlyar, Elona; Maierwieser, Rory J.; Tran, Ulrich S.	2020	Personality and Individual Differences, 2020	https://doi.org/10.1016/j.paid.2019.109676
Personality Psychology	Personality and prosocial behavior: A theoretical framework and meta-analysis	Thielmann, Isabel; Spadaro, Giuliana; Balliet, Daniel	2020	Psychological Bulletin	https://doi.org/10.1037/bul0000217
Personality Psychology	Setting doesn't matter much. A meta-analytic comparison of the results of intelligence tests obtained in group and individual settings	Becker, Nicolas; Koch, Marco; Schult, Johannes; Spinath, Frank M.	2019	European Journal of Psychological Assessment	https://doi.org/10.1027/1015-5759/a000402
Personality Psychology	The association between the big five personality traits and smartphone use disorder: A meta-analysis	Marengo, Davide; Sindermann, Cornelia; H<U+FFFD>ckel, Daniela; Settanni, Michele; Elhai, Jon D.; Montag, Christian	2020	Journal of Behavioral Addictions	https://doi.org/10.1556/2006.2020.00069
Personality Psychology	Does Eysenck's personality model capture psychosis-proneness? A systematic review and meta-analysis	Knezevic, Goran; Lazarevic, Ljiljana B.; Puric, Danka; Bosnjak, Michael; Teovanovic, Predrag; Petrovic, Boban; Opacic, Goran	2019	Personality and Individual Differences	https://doi.org/10.1016/j.paid.2019.02.009
Personality Psychology	Extraversion in sport: A scoping review	Allen, Mark S.; Mison, Erin A.; Robson, Davina A.; Laborde, Sylvain	2020	International Review of Sport and Exercise Psychology	https://doi.org/10.1080/1750984X.2020.1790024
Personality Psychology	Optimism and the experience of pain: A systematic review	Basten-G<U+FFFD>nther, Johanna; Peters, Madelon; Lautenbacher, Stefan	2019	Behavioral Medicine	https://doi.org/10.1080/08964289.2018.1517242
Personality Psychology	Intra-individual value change in adulthood. A systematic literature review of longitudinal studies assessing Schwartz's value orientations	Schuster, Carolin; Pinkowski, Lisa; Fischer, Daniel	2019	Zeitschrift f<U+FFFD>r Psychologie	https://www.hogrefe.de/produkte/zeitschriften/zfp
Personality Psychology	Trait personality in sport and exercise psychology: A mapping review and research agenda	Laborde, Sylvain; Allen, Mark S.; Katschak, Kristin; Mattonet, Katharina; Lachner, Nicolas	2020	International Journal of Sport and Exercise Psychology	https://doi.org/10.1080/1612197X.2019.1570536
Personality Psychology	The psychology of morality: A review and analysis of empirical studies published from 1940 through 2017	Ellemers, Naomi; van der Toorn, Jojanneke; Paunov, Yavor; van Leeuwen, Thed	2019	Personality and Social Psychology Review	https://doi.org/10.1177/1088868318811759
Personality Psychology	Gender differences in humor-related traits, humor appreciation, production, comprehension, (neural) responses, use, and correlates: A systematic review	Hofmann, Jennifer; Platt, Tracey; Lau, Chlo<U+FFFD>; Torres-Mar<U+FFFD>n, Jorge	2020	Current Psychology	https://doi.org/10.1007/s12144-020-00724-1
Personality Psychology	A meta-analysis of the effects of teacher personality on teacher effectiveness and burnout	Kim, Lisa E.; J<U+FFFD>rg, Verena; Klassen, Robert M.	2019	Educational Psychology Review	https://doi.org/10.1007/s10648-018-9458-2
Personality Psychology	"Don't you know I own the road?" The link between narcissism and aggressive driving	Bushman, Brad J.; Steffgen, Georges; Kerwin, Thomas; Whitlock, Tyler; Weisenberger, Janet M.	2018	Transportation Research Part F: Traffic Psychology and Behaviour	https://doi.org/10.1016/j.trf.2017.10.008
Personality Psychology	Resting frontal EEG asymmetry and personality traits: A meta-analysis	Kuper, Niclas; K<U+FFFD>ckenmester, Wiebke; Wacker, Jan	2019	European Journal of Personality	https://doi.org/10.1002/per.2197
Personality Psychology	Multidimensional perfectionism and the Big Five personality traits: A meta-analysis	Stricker, Johannes; Buecker, Susanne; Schneider, Michael; Preckel, Franzis	2019	European Journal of Personality	https://doi.org/10.1002/per.2186
Personality Psychology	Are gifted students more emotionally intelligent than their non-gifted peers? A meta-analysis	Abdulla Alabbasi, Ahmed M.; Ayoub, A. Alaa Eldin; Ziegler, Albert O.	2020	High Ability Studies	https://doi.org/10.1080/13598139.2020.1770704
Personality Psychology	Who networks? - A meta-analysis of networking and personality	Bendella, Hadjira; Wolff, Hans-Georg	2020	Career Development International	https://doi.org/10.1108/CDI-12-2019-0289
Personality Psychology	Intelligenz, Zielorientierung und Ego-Depletion als Antezedenzien von Adaption: Metaanalytische und experimentelle Befunde	Stasielowicz, Lukasz Patryk	2018		http://nbn-resolving.de/urn:nbn:de:gbv:700-20180815511
Personality Psychology	Personality-obesity associations are driven by narrow traits: A meta-analysis	Vainik, Uku; Dagher, Alain; Realo, Anu; Mortensen, Erik Lykke; Jang, Kerry; Juko, Ando; Kandler, Christian	2019	Obesity Reviews	https://doi.org/10.1111/obr.12856
Personality Psychology	Big-Five personality and political orientation: Results from four panel studies with representative German samples	Krieger, Florian; Becker, Nicolas; Greiff, Samuel; Spinath, Frank M.	2019	Journal of Research in Personality	https://doi.org/10.1016/j.jrp.2019.04.012
Personality Psychology	"A joke a day keeps the doctor away?" Meta-analytical evidence of differential associations of habitual humor styles with mental health	Schneider, Martha; Voracek, Martin; Tran, Ulrich S.	2018	Scandinavian Journal of Psychology	https://doi.org/10.1111/sjop.12432
Personality Psychology	Sexualizing media use and self-objectification: A meta-analysis	Karsay, Kathrin; Knoll, Johannes; Matthes, Joerg	2018	Psychology of Women Quarterly	https://doi.org/10.1177/0361684317743019
Personality Psychology	How efficient are emotional intelligence trainings: A meta-analysis	Hodzic, Sabina; Scharfen, Jana; Ripoll, Pilar; Holling, Heinz; Zenasni, Franck	2018	Emotion Review	https://doi.org/10.1177/1754073917708613
Personality Psychology	The nomological net of the HEXACO model of personality: A large-scale meta-analytic investigation	Zettler, Ingo; Thielmann, Isabel; Hilbig, Benjamin E.; Moshagen, Morten	2020	Perspectives on Psychological Science	https://doi.org/10.1177/1745691619895036
Personality Psychology	Openness and postsecondary academic performance: A meta-analysis of facet-, aspect-, and dimension-level correlations	Gatzka, Thomas; Hell, Benedikt	2018	Journal of Educational Psychology	https://doi.org/10.1037/edu0000194
Personality Psychology	Association of the polygenic scores for personality traits and response to selective serotonin reuptake inhibitors in patients with major depressive disorder	Amare, Azmeraw T.; Schubert, Klaus Oliver; Tekola-Ayele, Fasil; Hsu, Yi-Hsiang; Sangkuhl, Katrin; Jenkins, Gregory; Whaley, Ryan M.; Barman, Poulami; Batzler, Anthony; Altman, Russ B.; Arolt, Volker; Brockm<U+FFFD>ller, J<U+FFFD>rgen; Chen, Chia-Hui; Domschke, Katharina; Hall-Flavin, Daniel K.; Hong, Chen-Jee; Illi, Ari; Ji, Yuan; Kampman, Olli; Kinoshita, Toshihiko; Leinonen, Esa; Liou, Ying-Jay…	2018	Frontiers in Psychiatry, 2018	https://doi.org/10.3389/fpsyt.2018.00065
Personality Psychology	How do different ways of measuring individual differences in zero-acquaintance personality judgment accuracy correlate with each other?	Hall, Judith A.; Back, Mitja D.; Nestler, Steffen; Frauendorfer, Denise; Mast, Marianne Schmid; Ruben, Mollie A.	2018	Journal of Personality	https://doi.org/10.1111/jopy.12307
Personality Psychology	Narcissism and social networking behavior: A meta-analysis	Gnambs, Timo; Appel, Markus	2018	Journal of Personality	https://doi.org/10.1111/jopy.12305
Personality Psychology	Towards a human self-regulation system: Common and distinct neural signatures of emotional and behavioural control	Langner, Robert; Leiberg, Susanne; Hoffstaedter, Felix; Eickhoff, Simon B.	2018	Neuroscience and Biobehavioral Reviews	https://doi.org/10.1016/j.neubiorev.2018.04.022
Personality Psychology	Individual differences in risk taking and endogeneous levels of testosterone, estradiol, and cortisol: A systematic literature search and three independent meta-analyses	Kurath, Jennifer; Mata, Rui	2018	Neuroscience and Biobehavioral Reviews	https://doi.org/10.1016/j.neubiorev.2018.05.003
Personality Psychology	Association of schizotypy with dimensions of cognitive control: A meta-analysis	Steffens, Maria; Meyh<U+FFFD>fer, Inga; Fassbender, Kaja; Ettinger, Ulrich; Kambeitz, Joseph	2018	Schizophrenia Bulletin, 2018	https://doi.org/10.1093/schbul/sby030
Personality Psychology	Indirect (implicit) and direct (explicit) self-esteem measures are virtually unrelated: A meta-analysis of the initial preference task	Pietschnig, Jakob; Gittler, Georg; Stieger, Stefan; Forster, Michael; Gadek, Natalia; Gartus, Andreas; Kocsis-Bogar, Krisztina; Kubicek, Bettina; L<U+FFFD>ftenegger, Marko; Olsen, Jerome; Prem, Roman; Ruiz, Nina; Serfas, Benjamin G.; Voracek, Martin	2018	PLoS ONE, 2018	https://doi.org/10.1371/journal.pone.0202873
Personality Psychology	Meta-analytic investigations of the HEXACO Personality Inventory(-Revised). Reliability generalization, self-observer agreement, intercorrelations, and relations to demographic variables	Moshagen, Morten; Thielmann, Isabel; Hilbig, Benjamin E.; Zettler, Ingo	2019	Zeitschrift f<U+FFFD>r Psychologie	https://www.hogrefe.de/produkte/zeitschriften/zfp
Personality Psychology	Anger rumination partly accounts for the association between trait self-control and aggression	Li, Jian-Bin; Dou, Kai; Situ, Qiao-Min; Salcuni, Silvia; Wang, Yu-Jie; Friese, Malte	2019	Journal of Research in Personality	https://doi.org/10.1016/j.jrp.2019.06.011
Personality Psychology	Personal belief in a just world and conscientiousness: A meta-analysis, facet-level examination, and mediation model	Nudelman, Gabriel; Otto, Kathleen	2019	British Journal of Psychology	https://doi.org/10.1111/bjop.12438
Personality Psychology	The stability and change of loneliness across the life span: A meta-analysis of longitudinal studies	Mund, Marcus; Freuding, Maren M.; M<U+FFFD>bius, Kathrin; Horn, Nicole; Neyer, Franz J.	2020	Personality and Social Psychology Review	https://doi.org/10.1177/1088868319850738
Personality Psychology	Loneliness and the Big Five personality traits: A meta-analysis	Buecker, Susanne; Maes, Marlies; Denissen, Jaap J. A.; Luhmann, Maike	2020	European Journal of Personality	https://doi.org/10.1002/per.2229
Personality Psychology	Meta-analytic evidence for ambivalence resolution as a key process in effortless self-control	Schneider, Iris K.; Gillebaart, Marleen; Mattes, Andr<U+FFFD>	2019	Journal of Experimental Social Psychology, 2019	https://doi.org/10.1016/j.jesp.2019.103846
Personality Psychology	Effect declines are systematic, strong, and ubiquitous: A meta-meta-analysis of the decline effect in intelligence research	Pietschnig, Jakob; Siegel, Magdalena; Eder, Junia Sophia Nur; Gittler, Georg	2019	Frontiers in Psychology, 2019	https://doi.org/10.3389/fpsyg.2019.02874
Personality Psychology	Is healthy neuroticism associated with health behaviors? A coordinated integrative data analysis	Graham, Eileen K.; Weston, Sara J.; Turiano, Nicholas A.; Ashwanden, Damaris; Booth, Tom; Harrison, Fleur; James, Bryan D.; Lewis, Nathan A.; Makkar, Steven R.; Mueller, Swantje; Wisniewski, Kristi M.; Yoneda, Tomiko; Zhaoyang, Ruixue; Spiro, Avron; Willis, Sherry; Schaie, K. Warner; Sliwinski, Martin; Lipton, Richard A.; Katz, Mindy J.; Deary, Ian J.; Zelinski, Elizabeth M.; Bennett, David A.; S…	2020	Collabra: Psychology, 2020	https://doi.org/10.1525/collabra.266
Personality Psychology	Is healthy neuroticism associated with chronic conditions? A coordinated integrative data analysis	Weston, Sara J.; Graham, Eileen K.; Turiano, Nicholas A.; Aschwanden, Damaris; Booth, Tom; Harrison, Fleur; James, Bryan D.; Lewis, Nathan A.; Makkar, Steven R.; Mueller, Swantje; Wisniewski, Kristi M.; Yoneda, Tomiko; Zhaoyang, Ruixue; Spiro, Avron; Drewelies, Johanna; Wagner, Gert G.; Steinhagen-Thiessen, Elisabeth; Demuth, Ilja; Willis, Sherry; Schaie, K. Warner; Sliwinski, Martin; Lipton, Ric…	2020	Collabra: Psychology, 2020	https://doi.org/10.1525/collabra.267
Personality Psychology	The structure of the Rosenberg Self-Esteem Scale. A cross-cultural meta-analysis	Gnambs, Timo; Scharl, Anna; Schroeders, Ulrich	2018	Zeitschrift f<U+FFFD>r Psychologie	https://doi.org/10.1027/2151-2604/a000317
Personality Psychology	The truth about lies: A meta-analysis on dishonest behavior	Gerlach, Philipp; Teodorescu, Kinneret; Hertwig, Ralph	2019	Psychological Bulletin	https://doi.org/10.1037/bul0000174
Personality Psychology	A meta-analysis of gender differences in character strengths and age, nation, and measure as moderators	Heintz, Sonja; Kramm, Christoph; Ruch, Willibald	2019	Journal of Positive Psychology	https://doi.org/10.1080/17439760.2017.1414297
Personality Psychology	Is the Flynn effect related to migration? Meta-analytic evidence for correlates of stagnation and reversal of generational IQ test score changes	Pietschnig, Jakob; Voracek, Martin; Gittler, Georg	2018	Politische Psychologie	http://www.psychologie-aktuell.com/index.php?id=288
Personality Psychology	Four-branch model of ability emotional intelligence with fluid and crystallized intelligence: A meta-analysis of relations	Olderbak, Sally; Semmler, Martin; Doebler, Philipp	2019	Emotion Review	https://doi.org/10.1177/1754073918776776
Personality Psychology	Shyness and social media use: A meta-analytic summary of moderating and mediating effects	Appel, Markus; Gnambs, Timo	2019	Computers in Human Behavior	https://doi.org/10.1016/j.chb.2019.04.018
Personality Psychology	A meta-analysis of the relationship between emotion recognition ability and intelligence	Schlegel, Katja; Palese, Tristan; Mast, Marianne Schmid; Rammsayer, Thomas H.; Hall, Judith A.; Murphy, Nora A.	2020	Cognition and Emotion	https://doi.org/10.1080/02699931.2019.1632801
Personality Psychology	Intellectual giftedness and multidimensional perfectionism: A meta-analytic review	Stricker, Johannes; Buecker, Susanne; Schneider, Michael; Preckel, Franzis	2020	Educational Psychology Review	https://doi.org/10.1007/s10648-019-09504-1
Personality Psychology	Self-enhancement and psychological adjustment: A meta-analytic review	Dufner, Michael; Gebauer, Jochen E.; Sedikides, Constantine; Denissen, Jaap J. A.	2019	Personality and Social Psychology Review	https://doi.org/10.1177/1088868318756467
Personality Psychology	A systematic review and meta-analysis of psychological research on conspiracy beliefs: Field characteristics, measurement instruments, and associations with personality traits	Goreis, Andreas; Voracek, Martin	2019	Frontiers in Psychology, 2019	https://doi.org/10.3389/fpsyg.2019.00205
Personality Psychology	The relationship between sense of coherence and post-traumatic stress: A meta-analysis	Sch<U+FFFD>fer, S. K.; Becker, N.; King, L.; Horsch, A.; Michael, T.	2019	European Journal of Psychotraumatology, 2019	https://doi.org/10.1080/20008198.2018.1562839
Personality Psychology	Mindfulness and sustainability: Correlation or causation?	Geiger, Sonja M.; Grossman, Paul; Schrader, Ulf	2019	Current Opinion in Psychology	https://doi.org/10.1016/j.copsyc.2018.09.010
Personality Psychology	Goal orientation and performance adaptation: A meta-analysis	Stasielowicz, Lukasz	2019	Journal of Research in Personality, 2019	https://doi.org/10.1016/j.jrp.2019.103847
Sexuality and Relationships	Neuroelectric correlates of human sexuality: A review and meta-analysis	Ziogas, Anastasios; Habermeyer, Elmar; Santtila, Pekka; Poeppl, Timm B.; Mokros, Andreas	2020	Archives of Sexual Behavior	https://doi.org/10.1007/s10508-019-01547-3
Sexuality and Relationships	The link between masculinity ideologies and posttraumatic stress: A systematic review and meta-analysis	Kaiser, Julia; Hanschmidt, Franz; Kersting, Anette	2020	Psychological Trauma: Theory, Research, Practice, and Policy	https://doi.org/10.1037/tra0000578
Sexuality and Relationships	Literatur<U+FFFD>bersicht zur pr<U+FFFD>diktiven Validit<U+FFFD>t des Static-99 im deutschsprachigen Raum	Kube, Silvia; Banse, Rainer	2020	Forensische Psychiatrie, Psychologie, Kriminologie	https://doi.org/10.1007/s11757-020-00616-x
Sexuality and Relationships	Being trans without medical transition: Exploring characteristics of trans individuals from Germany not seeking gender-affirmative medical interventions	Nieder, Timo O.; Eyssel, Jana; K<U+FFFD>hler, Andreas	2020	Archives of Sexual Behavior	https://doi.org/10.1007/s10508-019-01559-z
Sexuality and Relationships	Autismus-Spektrum-St<U+FFFD>rungen und Geschlechtsdysphorie bei Kindern und Jugendlichen: Systematisches Review zur gemeinsamen Pr<U+FFFD>valenz	Herrmann, Lena; Bindt, Carola; Schweizer, Katinka; Micheel, Jan; Nieder, Timo Ole; Haa<U+FFFD>, Judith; Sch<U+FFFD>ttle, Daniel; Becker-Hebly, Inga	2020	Psychiatrische Praxis	https://doi.org/10.1055/a-1148-4873
Sexuality and Relationships	Gender differences in humor-related traits, humor appreciation, production, comprehension, (neural) responses, use, and correlates: A systematic review	Hofmann, Jennifer; Platt, Tracey; Lau, Chlo<U+FFFD>; Torres-Mar<U+FFFD>n, Jorge	2020	Current Psychology	https://doi.org/10.1007/s12144-020-00724-1
Sexuality and Relationships	Sexualizing media use and self-objectification: A meta-analysis	Karsay, Kathrin; Knoll, Johannes; Matthes, Joerg	2018	Psychology of Women Quarterly	https://doi.org/10.1177/0361684317743019
Sexuality and Relationships	A demonstration of the Collaborative Replication and Education Project: Replication attempts of the red-romance effect	Wagge, Jordan R.; Baciu, Cristina; Banas, Kasia; Nadler, Joel T.; Schwarz, Sascha; Weisberg, Yanna; IJzerman, Hans; Legate, Nicole; Grahe, Jon	2019	Collabra: Psychology, 2019	https://doi.org/10.1525/collabra.177
Sexuality and Relationships	The impact of maternal eating disorders on dietary intake and eating patterns during pregnancy: A systematic review	D<U+FFFD>rsam, Annica F.; Prei<U+FFFD>l, Hubert; Micali, Nadia; L<U+FFFD>rcher, Sophia B.; Zipfel, Stephan; Giel, Katrin E.	2019	Nutrients, 2019	https://doi.org/10.3390/nu11040840
Sexuality and Relationships	Women's psychological experiences of physiological childbirth: A meta-synthesis	Olza, Ibone; Leahy-Warren, Patricia; Benyamini, Yael; Kazmierczak, Maria; Karlsdottir, Sigfridur Inga; Spyridou, Andria; Crespo-Mirasol, Esther; Tak<U+FFFD>cs, Lea; Hall, Priscilla J.; Murphy, Margaret; Jonsdottir, Sigridur Sia; Downe, Soo; Nieuwenhuijze, Marianne J.	2018	BMJ Open, 2018	https://doi.org/10.1136/bmjopen-2017-020347
Sexuality and Relationships	Gender stereotypes have changed: A cross-temporal meta-analysis of US public opinion polls from 1946 to 2018	Eagly, Alice H.; Nater, Christa; Miller, David I.; Kaufmann, Mich<U+FFFD>le; Sczesny, Sabine	2020	American Psychologist	https://doi.org/10.1037/amp0000494
Sexuality and Relationships	The effects of relationship education in low-income couples: A meta-analysis of randomized-controlled evaluation studies	Arnold, Louisa S.; Beelmann, Andreas	2019	Family Relations	https://doi.org/10.1111/fare.12325
Sexuality and Relationships	Machine learning uncovers the most robust self-report predictors of relationship quality across 43 longitudinal couples studies	Joel, Samantha; Eastwick, Paul W.; Allison, Colleen J.; Arriaga, Ximena B.; Baker, Zachary G.; Bar-Kalifa, Eran; Bergeron, Sophie; Birnbaum, Gurit E.; Brock, Rebecca L.; Brumbaugh, Claudia C.; Carmichael, Cheryl L.; Chen, Serena; Clarke, Jennifer; Cobb, Rebecca J.; Coolsen, Michael K.; Davis, Jody; de Jong, David C.; Debrot, Anik; DeHaas, Eva C.; Derrick, Jaye L.; Eller, Jami; Estrada, Marie-Joel…	2020	Proceedings of the National Academy of Sciences of the United States of America	https://doi.org/10.1073/pnas.1917036117
Sexuality and Relationships	The efficacy of emotionally focused couples therapy and behavioral couples therapy: A meta-analysis	Rathgeber, Maren; B<U+FFFD>rkner, Paul-Christian; Schiller, Eva-Maria; Holling, Heinz	2019	Journal of Marital and Family Therapy	https://doi.org/10.1111/jmft.12336
Sexuality and Relationships	Quality matters: A meta-analysis on components of healthy family meals	Dallacker, Mattea; Hertwig, Ralph; Mata, Jutta	2019	Psychology and Health	https://doi.org/10.1037/hea0000801
Society_Climate	The role of trust for climate change mitigation and adaptation behaviour: A meta-analysis	Cologna, Viktoria; Siegrist, Michael	2020	Journal of Environmental Psychology, 2020	https://doi.org/10.1016/j.jenvp.2020.101428
Society_Climate	Wetter und Suizid. Assoziation zwischen meteorologischen Variablen und suizidalem Verhalten - eine qualitative systematische <U+FFFD>bersichtsarbeit	Pervilhac, Charlotte; Schoilew, Kyrill; Znoj, Hansj<U+FFFD>rg; M<U+FFFD>ller, Thomas J.	2020	Der Nervenarzt	https://doi.org/10.1007/s00115-019-00795-x
Society_Corona	Psychische Belastungen, Resilienz, Risiko- und protektive Faktoren w<U+FFFD>hrend der SARS-CoV-2-Pandemie. Systematische Literaturanalyse und Studienergebnisse aus dem deutschen COSMO-Panel	Gilan, Donya; R<U+FFFD>thke, Nikolaus; Blessin, Manpreet; Kunzler, Angela; Stoffers-Winterling, Jutta; M<U+FFFD>ssig, Markus; Yuen, Kenneth S. L.; T<U+FFFD>scher, Oliver; Thrul, Johannes; Kreuter, Frauke; Sprengholz, Philipp; Betsch, Cornelia; Stieglitz, Rolf Dieter; Lieb, Klaus	2020	Deutsches <U+FFFD>rzteblatt	https://doi.org/10.3238/arztebl.2020.0625
Society_Migration	Migration and schizophrenia: Meta-analysis and explanatory framework	Henssler, Jonathan; Brandt, Lasse; M<U+FFFD>ller, Martin; Liu, Shuyan; Montag, Christiane; Sterzer, Philipp; Heinz, Andreas	2020	European Archives of Psychiatry and Clinical Neuroscience	https://doi.org/10.1007/s00406-019-01028-7
Society_Migration	Prevalence of mental disorders in young refugees and asylum seekers in European countries: A systematic review	Kien, Christina; Sommer, Isolde; Faustmann, Anna; Gibson, Lacey; Schneider, Martha; Krczal, Eva; Jank, Robert; Klerings, Irma; Szelag, Monika; Kerschner, Bernd; Brattstr<U+FFFD>m, Petter; Gartlehner, Gerald	2019	European Child & Adolescent Psychiatry	https://doi.org/10.1007/s00787-018-1215-z
Society_Migration	Sleep disorders in migrants and refugees: A systematic review with implications for personalized medical approach	Richter, Kneginja; Baumg<U+FFFD>rtner, Lisa; Niklewski, G<U+FFFD>nter; Peter, Lukas; K<U+FFFD>ck, Melanie; Kellner, Stefanie; Hillemacher, Thomas; B<U+FFFD>ttner-Teleaga, Antje	2020	EPMA Journal	https://doi.org/10.1007/s13167-020-00205-2
Society_Migration	Is the Flynn effect related to migration? Meta-analytic evidence for correlates of stagnation and reversal of generational IQ test score changes	Pietschnig, Jakob; Voracek, Martin; Gittler, Georg	2018	Politische Psychologie	http://www.psychologie-aktuell.com/index.php?id=288
Society_Migration	Wirksamkeit von Sprachf<U+FFFD>rderung bei Kindern und Jugendlichen mit Migrationshintergrund - eine Meta-Analyse	Beelmann, Andreas; Lutterbach, Sebastian; Schulz, Angelika; Schulz, Sebastian	2018	Politische Psychologie	http://www.psychologie-aktuell.com/index.php?id=288
Society_Migration	Psychological interventions for posttraumatic stress disorder and depression in refugees: A meta-analysis of randomized controlled trials	Kip, Ahlke; Priebe, Stefan; Holling, Heinz; Morina, Nexhmedin	2020	Clinical Psychology and Psychotherapy	https://doi.org/10.1002/cpp.2446
Society_Migration	Revisiting culture. A review of a neglected dimension in media psychology	Oda^D&; g, <U+FFFD>zen; Hanke, Katja	2019	Journal of Media Psychology	https://doi.org/10.1027/1864-1105/a000244
Society_Migration	Qualification programmes for immigrant health professionals: A systematic review	Khan-G<U+FFFD>kkaya, Sidra; Higgen, Sanna; M<U+FFFD>sko, Mike	2019	PLoS ONE, 2019	https://doi.org/10.1371/journal.pone.0224933
Society_Migration	Lack of evidence for the efficacy of psychotherapies for PTSD and depression in child and adolescent refugees	Morina, Nexhmedin; Sterr, Tim Nicolai	2019	World Psychiatry	https://doi.org/10.1002/wps.20596
Society_Migration	The cultural identity of first-generation immigrant children and youth: Insights from a meta-analysis	Maehler, D<U+FFFD>bora B.; Daikeler, Jessica; Ramos, Howard; Husson, Clara; Nguyen, Thuy An	2020	Self and Identity	https://doi.org/10.1080/15298868.2020.1765857
Society_Migration	Past-focused temporal communication overcomes conservatives' resistance to liberal political ideas	Lammers, Joris; Baldwin, Matt	2018	Journal of Personality and Social Psychology	https://doi.org/10.1037/pspi0000121
